# Supplementary material for: Pathogen-induced biosynthetic pathways encode defense-related molecules in bread wheat
Source: PubMed Central journal article supplement (PMC9169793; doi:10.1073/pnas.2123299119), 2022-04-11
Supplement: pnas.2123299119.sapp.pdf [file pnas.2123299119.sapp.pdf]

**Supplementary Information for:**

**Pathogen-Induced Biosynthetic Pathways Encode Defense-Related Molecules in  
Bread Wheat**

Guy Polturak<sup>1\*</sup>, Martin Dippe<sup>1,2</sup>, Michael J. Stephenson<sup>1</sup>, Rajesh Chandra Misra<sup>1</sup>, Charlotte Owen<sup>1</sup>, Ricardo H. Ramirez-Gonzalez<sup>3</sup>, John F. Haidoulis<sup>3</sup>, Henk-Jan Schoonbeek<sup>3</sup>, Laetitia Chartrain<sup>3</sup>, Philippa Borrill<sup>1</sup>, David R. Nelson<sup>4</sup>, James K.M. Brown<sup>3</sup>, Paul Nicholson<sup>3</sup>, Cristobal Uauy<sup>3</sup> and Anne Osbourn<sup>1\*</sup>

<sup>1</sup>Department of Biochemistry and Metabolism, John Innes Centre, Norwich NR4 7UH, United Kingdom

<sup>2</sup>Current address: Department of Bioorganic Chemistry, Leibniz Institute of Plant Biochemistry, D-06120 Halle (Saale), Germany

<sup>3</sup>Department of Crop Genetics, John Innes Centre, Norwich NR4 7UH, United Kingdom

<sup>4</sup>Department of Microbiology, Immunology and Biochemistry, University of Tennessee Health Science Center, Memphis, TN 38163

\*To whom correspondence should be addressed: Email: [guy.polturak@jic.ac.uk](mailto:guy.polturak@jic.ac.uk);

[anne.osbourn@jic.ac.uk](mailto:anne.osbourn@jic.ac.uk)

**SI Materials and Methods.** Coding sequences of genes used in this study. Synthesized genes are asterisked.

>TaCHS1\* (TraesCS5D02G488700; GenBank ON108659)

ATGGCCGCGCTGTTACCGTAGACGAAGTAATGAAGATGCAGAGAGCGCAGGGCCCCGCAACTGTGTTAGCAATA  
GGTACGGCCACTCCACATAACTGCGTTTACCAAGCAGACTACGCTGACTACTACTTTAGGATCACCAATAGTGAA  
CATCTGACAGATCTAAAAGACAAATTCCAAAGAATGTGTGACCGAAGTATGATCAGAAAAGCGTTACATGCATGTG  
ACCGAGGAGATTCTCAAAGAGAACCCCAACGTTTGCCTTACATGGCGCCTAGCCTAGATGCTCGCAAGACATG  
GTGCTTGGTGAGGTTCCCAAGCTGGGGAAAAGAGGCTGCTCATAAGGCAATCAAGGAATGGGGACAGCCTCTCTCC  
AAGATCACTCACCTCGTTTTCTGCACAACGAGTGGAGTGGACATGCCAGGTGCCGACTATCAGCTGACTAAGATG  
CTTGGTCTGCACCCATCTGTAAGAAGGGTGATGTTATACCAGCAAGGTTGCTTTGCTGGTGGTACAGTGCTACGT  
GTGGCTAAGGACTTAGCCGAGAACAACAGAGGAGCTCGTGTGCTTGTAGTGTGCTCCGAGATAACAGCAGTTACT  
TTTCGAGGCCCGTGTGACACCCAGTTGGATTCCATGGTCCGACAGGCTTTGTTTGGCGATGGCGCAGCTGCAGTC  
GTTGTGGGCGCTGACCCCGACGTATTGGTGGAAACGGCCCTTATTCAACTTGTATCTGCTTCCAGACCATATTA  
CCAGACACAGATGGTTTCATCAAGGGCCACCTTCGAGAGGTTGGACTTACATTCCACCTTACAAGGATGTACCT  
GTTGCGATATCAAAGAACATAACAACAAGCACTTGAGGACGCGTTCGCACCACTCGGCATCGATGACTGGAACCTCT  
ATATTTTGGGTAGCCCACCCGGGTGGCCAGCCATTTTGGACATGGTCGAGGCTGAGGCTAAGCTTGACAAACGA  
AGAATGAGGGCAACTAGGCACATATTGTCTGAGTACGGGAACATGTCCAGCGCTTGTGTGTTGTTTCATCTTAGAC  
GAGATGAGGAAGAGGCTGTCAGAGGACGGCCACGCTACCACAGGCGAGGGTCTAGACTGGGGCGTCTCTGTTTGG  
TTCGGACCCGGTCTTACGGTAGAGACAGTTGTCTACACAGTGTGAGGACAACAGCCGCTTGA

>chi-D1\* (TraesCS5D02G489000; GenBank JN039039)

ATGGCAGTTTCCGAAGTAGAAGTTGATGGTGTGTTGATTTCCACCCTTAGCAAGACCACCAGGAAGCGAACATGCG  
CATTTCTTGGCTGGTGCCGGTGTAGAGGCATGGAAATTTGGTGGGAATTTTATTAAATTTACAGCTATAGGAGTT  
TATTTGCAAGCTGATGCTGCTGTTAGTGCTCTTTCGGCTAAAATGGGCTGGAAAACCTGCAGCGGATTTAGCATCA  
GATGCAGCTTTCTTTTCGTGATGTAGTTACTGGAGAATTTGAAAAGTTTACTCGGGTTACTATGATTTTGGCACTT  
ACTGGTGTCTCAATATTCTGATAAAGTCAACGAAAATTTGTGTTGCGTATTGGAAAGCAACAGGGGTCTATACTGAT  
GCTGAAGCAGCTGCTGTTGATAAATTTAAAGAAGCATTTGGCCCTCATAGTTTGTCTCTGGGGCTTCTATTTTA  
TTTACTCATTACCTGCTGGACTTCTGACAGTGGCTTTTAGCAAAGATTCCTCAGTTCCAGAATCTGGTGGTGT  
GCTATTGATAATGCTAGGTTGTGTGAAGCAGTACTTGAATCTATTATAGGTGAACATGGTGTCTCTCCGCAGCT  
AAACTTTTCTTAGCAACACGTGTTGCAGAACTTCTTGAAGGTGCTGCACTGGCAGGTGGTGAACCTGCTGCTGAA  
GCAGTCAGTGTCTCAGTATGA

>TaCYP71C164\_5D (TraesCS5D02G488500; GenBank ON108660)

ATGGAAGATCTCGTGAAGAAACCCATGCCAGAGACACCTCCGCGGGCATTGTTTCTGTTCCCTATTCTTCCTCTTC  
CTCTTGTGTTGTAAGCTGGTTCACTGGAAAGACAAGAAAAATGCAGCATCAGCAGCGAGAAAACAACCACCTCCCG  
CTCCCGCCTTCGCCCGCCGCACTGCCCATCATTGGTCACCTGCACCTCGTCGGCTCCCTCCCGCAGCTCTCTCTC  
CGCAGCCTTGCCAGGAAGTATGGTCCCGACATGATGCTTCTGCGCTGGGCGCCGCGGACCCCTCGTGGTGTGCG  
TCGCTGCGTGGCGCAGAGGACAGTGTGCGCACCCACGACCACATCTTGGCGTCGCGGCCAGCTCCGTAGTCTCC  
GACATCCTCACGTACGGCTCGTCTGATATGGCCTTCGCGCCATACGGCGAGTACTGGCGGACAGGTGAGGAAGCTG  
GTCACCACCCACATGTTGAGCGTTAAGAAGGTGCAGTCTTTCGCGAGCGTGCCATGGAGGAGGTGAGCTTGGTG  
ATGGCCAAGATTAATGAGGTGGCCACAACCGATGGTACGGTGGACATGAGAGAGCTTCTCAGCTTATTCGCGAAT  
GACATGGGGTGGCGCATCGTATCGGGAAAGTTCTTCTAAAAGATGGACAGAGCAAGTTGTTCCGGGACCTCACC  
AACGATACCTCACGGCTGTTAGGAGGGTTCAACGTGGAGGAGTACTTCCAGGATTTGGCAAGGGTAGGAGTGT  
AAGAGGGCAGTTTGTGCCAAGCCGAGAGAGTGAAGAAATAGATGGGCTGATCTGCTAGACAAGGTGATCGACGAT  
CATGTGAGCAAGGATAAGTCAACGTTTGTATCACGAGGATGGTGTATTTGTAGATATTCTGTTGACTTTTTCAGCAC  
GAGTATGATCTCACAAGAGAGCACATGAAAGCTATCCTGATAGATGTATTTGCCGGTGAACAGACACATCAGCT  
AACGCCCTCGAATTCACCTTGGCCGAGCTCATGAGGAAGCCACGTGTGATGGGGAAGCTACAAGCTGAGGTGAGG  
AGTAACGTACCCAGGGACAAGAAATTTGTCAGTGAATCAACGTGAACAATATGGCATAACCTAAGAGCAGTCATA  
AAGGAGTGCCTTCGACTGTATCCTATTGCGCCTCTCCTTGGCTCCACACCTTGCCATGGATGACTGCAATATTGAT  
GGATATATGGTTCCTGCTGGGACGCGTGTGATGGTCAATGCATGGGCCATTGCTAGGGACTCGAGCTTGTGGGAG  
GACGCAGAAGAGTTTCATACCTGAAAGATTTACAGATGAAGGCAGCGCTATGCATGTCAATTTCAAGGGGAATGAT  
TTCCAGTTCTTGGCATTTCGGGGCAGGACGAAGGATGTGCCCGGTATGAACCTCGGAATCGCTAATGTTGAGCTT  
ATGTTGGCAAACCTCATGTACCATTTTACTGGGAACTTCCGCTTGGAGTTGAGAGAGAAGACATTTGATATGACA  
GCGGTGTTTGGGCTAACCATGCGCCGGAAGGAGAAAATATTGTTAATTCAAAAATCCTGGATGTAG

>TaCYP71F53\_5D (TraesCS5D02G487900; GenBank ON108661)

ATGGAGGGTTGGTTAACCTTATGTTTCATAGCCGTATCGACGTTAGTGGCCGTTTGGTTTTCCGGTGGCAAGAGC  
AAGCCCAAGAAGCATCTGCCTCCTGGGCCATGGACTCTCCCGGTATCGGCAGCCTCCACCACGTCCTCAGTGTG  
CTCCACACCCGACCATCACGGAGCTGTGTGCCGGCATGGGCCACTGATGCTCCTCAAGCTAGGTGAGGTTCCA  
ACCGTGGTAGTCTCGAGCGCCGAGGCGGTGGAGCAGGTGATGAAGACCAATGACATCGCCTTCTCGTACCGGCGG  
ACCACCGAGTTGCAGGACATCGTCGGCTTCGGCGCAAGGGCATCATCTTCGCCCCCTACGACAACCGCTGGCGC  
CAGATGCGCAAGGTCTGCATCATGGAGCTCCTCAATTCCAAGCAGGTGAAGCGCATGGAAGACATCAGGGCCGAG  
GAGGTGGGCCGCTCCTCCGCTCAATCATCACGGCCACAGCTGTGGGCGTACCGTCAACATCAGCCAGAAGGCT  
GCGGCGCTCAGCAATGCCGTGGTGACGCGGGCGGTGTTTCGGCGGCAAGTTCGCACGGCAGGAGGAGTACCTTCGC  
GAGATCAACCAACTCCTAGAGCTGTTGGGAGGATTCTGCCTTGTTCGACCTCTTCCCGTCGTCGCGGCTGGTGCGG  
TGTTTACGACTTTCGAGCGCCGCACAAAGAAGAGCTGCGACCTCATCCAGCACATCATCACCGGGGTGCTTGAC  
GAGCGCAAGGTGGTGCGAGCTGCCGGTGACGGCGCTGCAGCACCAGCATGAGGACCTACTGGACGTGCTGCTC  
AGGCTGCAGGAAGAGGACTCGTTGGCATAACCTCTAACGACAGAGAATATAACTACCGTCTTGTGTTGACATCTTT  
GCAGCTGGCACGGATACTACAGGAACCGCTTTGGAGTGGGCTATGTCAGAACTCATATGTCATCCTGAAGCTATG  
GCTAAGGCACAATTAGAGGTTTCGAGAGGTAAGTGGGTCATGGCCGAGCTATCATTTGGCAATAGCGATCTTGCAAAA  
CTCCACTACTTTCGGATGGTTCATCAAGGAGGTTCTTAGATTGCATCCACCTGGTGTCTACTTCCCGCAAGACT  
AGAGAGGACTGCAAAAATTATGGGTTATGACATGCTTAAAGATACAAAATATATACATTAATGTCTTCGCAATTTCC  
CGAGATCCTCGATATTGGAACAATCCTGAAGAGTTTAAATCCAGGAAGGTTTGAGAACAATAACGTGGATTATAAT  
GGGAATTTCTTTGAATTCACTCCTTTTCGGAGGTGGGCGACGGCAA  
TGCCCTGGGATAGCATTTCGCCACGTCACTTTTGGAGATCACTTTAGCAAATTTTATATCACTTCAACTGGATG  
CTTCTGGCGAAGCCAGCTCAGCGTCACTGGATATGTCTGAGAAATTTGGGTTCCACCATAGGTAGAACATCTAAT  
CTGCACCTCAAGGCTATTCCATATGTACGCTCCACTATATAG

>TaOMT3 (TraesCS5D02G488800; GenBank ON108662)

ATGGGCTCCACTGCCGTGGAGAAGGTGCTGTCGCCACTGGCGACGAGGAGGCGTGCATGTACGCGGTGAAGCTT  
GCAGCGGCATCTATCCTTCCAATGACCCTCAAGAACGCCATCGAGCTGGGCATGCTCGAGATCCTCGTGGGTGCC  
GGCGGGAAGATGTTGTACCTTCAGAGGTGGCAGCGCAGCTTCCGTGCAAGGCCAACCCGGAGGCACCGGTTATG  
GTGGACCGCATGCTGCGGCTGCTGGCATTGCAACAACGTGCTGTCATGCGAGGTGGAGGAAGGTAAGGACGGCCTC  
CTCGCCCGTCGATACGGCCCCGCGCCCGTGTGTAAGTGCTCACACCCAACGAGGACGGCGCATCCATGGCTGGG  
CTGCTCCTCATGACCCACGACAAGGTCACTATGGAGAGCTGGTATTTATTTGAAGGACGTGGCCCTTGAAGGCGGC  
CAACCATTCCACAGGGCGCACGGGATGACGGCGTACGAGTACAACAGCACAGACCCACGCGTAACTGCTTGTTC  
AACGAGGCCATGCTTAACCACTCCACCATCATACCAAGAAGCTCCTCGAGTTCTACAGGGGCTTCGACAACGTC  
GAGACCCTCGTGGATGTCGCCGGTGGCGTTGGTGCCACAGCCACGCCATCACCTCAAAGTACCCGCACATCAAG  
GGGGTAAACTTCGATCTCCCGCATGTCATATCCGAGGCGCCGCTTACCCTGGCGTGCAGCACATCGCCGGTGAC  
ATGTTCAAGAAGGTGCCCTCCGGCGATGCTATCCTCCTGAAGTGGATCCTCCACAACCTGGACCGACGATTACTGT  
ATGACTCTTCTGAGGAAGTCTACGATGCGTTGCCATGAATGGCAAGGTGGTTCATCGTGGAGGGCATCCTGCCG  
GTGAAACCAGATGCAATGCCAGCACGCAGACGATGTTCCAGGTGACATGATGATGCTGCTGCACACCGCAGGC  
GGCAAGGAGAGGGAAGTGAAGAGCTAGCGAAGGGCGCTGGGTTTCAGCACAGTCAAGACCAGCTAC  
ATCTACAGCACCGCATGGGTCATTGAGTTTCGTCAAATAG

>TaOMT6 (TraesCS5D02G488300; GenBank ON108663)

ATGGCGCCACCCAAGGCAAGCAGAGTTCTCAGGATTTGCTCGAGGCTCAAGTTGACCTTTGGCACCATTTCATTG  
GGATTTGTCAAGTCCATGGCACTCAAATGTGCAATGGAAGTCAAAATCCCTAACACCATCCAACACCATGGTGGG  
GCTATGACTCTTTCTGAGCTGGCCACAAAGACAGGGATCCATCCGTCTAAGCTTCCCCCTTAGGGCGACTCATG  
CGTGTACTCACCGTATCAGGCATCTTTGTTGTCCATGACTCAGCCTCGGGAGACAACAAGGAGGCTGTGTATGGA  
CTTACCCCAAGCACGTCCTCCTCGTCAGCGATGAAGTTAAATCAAACCTATTTCCCATTTCTGTCTTTGTTCCCTT  
GATTCAACTGCCATTACACCTTTTTTCGGCATGCACTCATGGTTCTTAGATGAGCATTCCACGTCCCTGTTCAAA  
AAGGCTCACGGCCTTAACGTTTTGGGAGATGGCTGACCAGAACAATGCTTGCAACGAGCAAATCAATAACGCGATG  
GTTTTCTGATAGTAACTTTTTTCATCAATATCCTCTTGGAGGAGTGTGGTGATGATTTCTTGGCATAAACTCACTT  
ATTGATGTTGCGGGAGGACACGGTGGAGCTGCTAGGGCAATTGCTATGTGCTTCCCCAGATGAAATGCACTGTG  
TTGGATCTCCCTCATGTGGTTGCTGGAGCTCCCAGTGTGATGCCCATGTGTCATTTATTTCTGGCGATATGTTAAG  
TACATTCACCGCGGATGCTCTTTTTCTGAAGTGCATTTTTTCAGATGGTGTGATGAAGACTGTGTCAAGCTA  
CTGAAGAATTGCAAGGAAGCTATCCCTCCCAGAGATGCTGGTGGAAAGGTGATAATCGTTGATATGGTGGTTGGA  
TCTGGGCCAGATGACATTGTAACAAGAGAGACACAGTTTTCTATGATCTCTTTATCATGGGTGCTGAGGGGATT  
GAGCGAGAGGAATTTGAGTGAAGAAGATATTTATGGAAGCTGGGTTTCAGCAATTACAAAATTTCTATCAGTGTG  
GGAGTTAGATCTGTTATTGAGCTCTACCCCTTGA

>TaOMT8 (TraesCS5D02G488900; GenBank ON108664)

ATGGGTTCTATCTCCGACGACGAGGCGGCTTGCATCTACGCGATGCAGCTGGCAGCGGCAGCTGTCTTGCCGATG  
ACGCTCAAGAACGCCATCGAGCTGGGCATGATCGAGATCCTCGTTGGCGCTGGCGGGAAGATGCTTTGCGCGTCT  
GAGGTGGCCGCCAGCTGCCGTCGACGGCCAACGCGGAAGCACCGGCCATCGTCGACCGCATGCTGCGGCTGCTG  
GCATCGACAACGTTGTGTCGTCGAGGTGGAGGAAGGTAAGGACGGCCGCTCGCACGCCGGTACGGCACCGCG  
CCGGTGTGCAAGTGGCTCAGCCCCGACGAGGACGGCGTGTCTTGGCCCCGATGGTCTCTTGAACGACAAGGTC  
ATGCTGGAGAGCTGGTACCATTTGAAGGACACTGTCTTAAACGGTGGCCTGCCATTCGAAAAAGCGTACGGAATG  
ACAGCGTTTGATTACCAAGGAACGGACCCGCGCTTAAATCGCGTCTTCAATGAGGCCATGAAGACCCACTCCATG  
ATCATACCAAGAAGCTCCTGGAGTTCTACAAGGGCTTCGATGGTGTGGGCACCCCTCGTGGACGTCGGTGGCGGT  
GTGGGCGCCACCATCCACACCATCCTTTGCAGGTACCCAAGCATCGAGGGGGTCAACTTCGACCTCCCTCACGTC  
ATCTCCGAGGCACCATCCTTTGCAGGTGTGCACCACATAGGTGGTGACATGTTCAAGAAGGTTCCCTCTGGGGAC  
GCAATCCTCATGAAGTGGATACTCCACGACTGGAACGATGAGCATTGCACAACGCTGCTGAGCAACTGCTACGAT  
GCACTACCCGCGCATGGCAAGGTGGTCATAGTGGAAATACATCCTGCCAGTGAAGCCCGACGAAACGGCCACAGCA  
CAGAGGTCCTTCGAAGCCGACATGATTATGCTCACACACACACCCGGCGGCAAGGAGAGGTACCTGAGGGAGTAC  
GAAGAGCTCGCCAGGAGCGCCGGGTTTGCCAGCGTCAAGGCCACCTACGTCTACAGCAACATATGGGTCAATTGAG  
TTGAACAAATAG

>TaCPS-D2 (truncated)\* (TraesCS2D02G029600; GenBank ON108665)

ATGATTAGCAAATCCCCATCCTATCCGGAGGTAGATGTGGGTGAATGGAAAGCTGATGAGTACAGACAACGCACG  
GATGAACCGAGCGAGATGCGACAGATGATCGATGCCATAAGAACGGCCCTGGCGTCATTGGGTGATGATGAGACT  
TCAATGAGTGTTCAGCCTACGACACAGCGTTGGTCGCCCTTGTCAAGAACCTTGACGGAGGCGATGGACCGCAA  
TTTCCCTCATGCATCGACTGGATTGTTCAAAAATCAACTACCAGATGGTTCGTGGGGTATCCGGCTTTCTTCATG  
GTCCAAGATCGGATGATCAGCACCCCTGGCATGTGTGTCGTGGCAGTGAAGTCTTGAACATTGACAGCGACAACCTG  
TGTGACAGGGGTGTGTTATTTATCAAAGAAAATATGAGCAGGTTGGTAGAAGAGGAACAGGACTGGATGCCATGC  
GGCTTTGAGATTAACCTCCCAGCACTCCTAGAGAAGGCCAAGGACCTGGACTTGGACATCCCTTATGATGACCCT  
GTTTTGGAAGAGATATATGCCAAGAGGAATCTGAAGCTCTCTAAGATACTCTGGATGTGCTGCACGCCATACCA  
ACGACCCTACTCTTCAGCGTCGAGGGAATGGTAGATTTACCATTGGACTGGGAAACGCTACTCAGATTGCGGTGT  
CCGGATGGCTCCTTCCATTCCCTCACCTGCTGCCACAGCTGCTGCCCTCAGTCACACCGGTGACAAGGAATGCCAT  
GCGTTCCCTGGATAGGCTCATCCAAAAGTTTCGAGGGGGGAGTGCCATGTAGCCACTCAATGGACACTTTTGTAGCAA  
TTATGGGTGGTCGATCGGCTGATGCGTCTGGGGATATCAAGGCACTTCACAAGTAAAATTCAGCAGTGTCTAGAG  
TTTATTTACAGGCGCTGGACTCAAAAAGGACTGGCTCACAACATGCACTGCCAATCCCGGATATTGATGACACA  
GCCATGGGTTTCCGTCTTCTCCGTACGATGGCTACGACGTCCTCCATCTGTGTTAAGCACTTTGAGAAGGAT  
GGCAAGTTCGTCTGCTTCCCAATGGAGACTAACCACGCTTCTGTACCCTAATGCACAACACTTACCCTGCATCT  
CAGTTCATGTTTCCGTGAGCAGCAGCTCCTGGCTAGGGCCGGCCGCTATTGCCGTGAATTCCTTCAAGAGAGA  
CAATCCTCCAACAAGCTGTACGACAAGTGGATCATACCAAGGACCTGCCGGGCGAGGTCGGGTACACGCTAAAC  
TTCCCATGGAAAGCAAGTTTTCGCGCAATTGAAACAAGGATGTATCTGGATCAGTACGGTGGCAACAACGATGTT  
TGGATTGCCAAGGTCCTTTACAGAATGAATCTTGTGAGCAACGACCTGTACCTTAAAATGGCTAAGGCTGATTTT  
AGAGAATATCAAAGACTCTCCCGAATTGAATGGAATGGCTCAGAAAAGTGGTATTTTTCAGGAACCATCTGCAGAGG  
TATGGTGGCAGCTCCAAAGAGCGCGCTGAAGGCTTACTTCTTAGCTTCAGCAAATATCTTCGAACCCGGCCGAGCA  
GCAGAACGTCTAGCATGGGCTCGCATGGCGGTGCTTGTGAGGCGGTTACAACCTCACTTCCGACACATTTGGGGGT  
CCATGCTATTCAACAGAGAATCTTGAAGAGCTTATCGACCTTGTTCGTTTGTGATGATGTTTCCGGCGGCCCTTCGT  
GAAGCGTGAAGCAGTGGCTTATGGCATGGACTGCAAAAGGAGAGCCATGGCTCCGTTGATGGAGATACAGCATTG  
TTGTTTCGTCCGACCATCGAGATCTGCTCAGGAAGGATTGTTTTCAGCCGAGCAGAAACCGAACCTTTGGGATTAT  
TCTCAGCTCGAGCAGCTCACCTCTTCCATCTGCCACAAGCTTGCCACAATAGGTCTTTCTCAGAATGAGGCAAGT  
ATGGAGAACACAGAGGACTTACACCGCAAGTGGATTTGGAGATGCAAGAATACTGGGCGTGTTCATCAGGGT  
TGCCATGGCATCAGTAGAGAGACTAGACAGACATTTCTCAACGTGGTGAAAAGCTTCTATTACTCGGCTCATTCG  
TCACATGAAAACAGTTGATAGCCACATCGCAAAGGTCATATTTTTCAGGATGTCATTTAG

>TaKSL-D1 (truncated)\* (TraesCS2D02G030100; GenBank ON108666)

ATGGCAATGTTGGCAGAAGAAACCATAGGACCGCGCAGTGATGTGGAACGGGATGCTAGAAATACGAAAGCATCTC  
AAAAACCTGAACTCTCGCCGTCTGCGTATGACACGGCATGGGTGGCTATGGTGCCATTGCCGGACTTCGATCCG  
CAGGCTCCATGCTTCCCTCAGTGTGTTGAATGGATATTGCAAAAATCAACACTCTAGTGGGTCTTGGGGAATCAAT  
GAATTTGGCTTATTAGCCAACAAGGATATTATGTTATCCACATTTGGCCTGTATCATTGCACTTCATAAGTGGAAC  
GTTGGCTCCGACCACATAAGGAGAGGATTAGAATTTATTGGAAGGAATTTCTCCACTGTCATGGATGATCAAAT  
GTTTCTCCAGTAGGCTTCAATCTCATTTCCTTGGTATGCTTAAACCATGCTTTCGGGATGGGTTTGATAATTCCA  
GTCACAGAAGCTGATATCAATGGGATACTTCACTCCGTGAGATGGAGCTGACAAGATTAAGTGGAGAGAAATCG  
TGTGGGAAAGATGCATATTTGGCCTATGTTGCTGAAGAAGGTTAGTAAACCTGCTGGACTACAATCAAGTGATG  
AAGTTCAGCGAAAGAATGGGTCGTTGTTCAACTCTCTGCCGCAACTGCTGCTGCATTAGTGCCTACTATGAT  
AATAAAGCTCTCCAGTACCTCGACTCCATTGTGAGTATATTTGGTGGTGCAGTACCAACAGCGTACCCACAGAAT  
ATATATTATCAGCTCTCAATGGTGGATATGCTCGAAAAGATCGGAATATCTCGCCATTTTTCGAGTGACACAAAC  
AGCATCCTGGACAAGGCATACATTTCTGGTTACAGAGAGACGAGGAGATCATGCAAGATGTAGAAACATGTGCA

ATGGCGTTTCGCCTTTTACGGATGAATGGTTATGATGTGTCGTCAGATGACTTGTCCCATGTTGCTGAAGCCTCC  
ACTTTCCATAGCTCACTTGAAGGATATTTAAATCATACAAAATCTTTATTGGAGTTATAACAAGCCTTCAAAAGTA  
TGTTTGTGAGAAAATGAATTGATCCTGGAGAACATAAGCAACTGGTCAGGCCACTTATTGGCAGAGAAAATTGCGC  
TGTGATGGGACACAAAGAATGCCAATTTTTGGAGAGGTAGAATATACTCTTAAATTTCCCTTTTATGCGACAGTA  
GAACCTCTAGACCATAAGAGGAACATTGAACATTTTATTCTAGGGTACTCAGCAGCTAAAGAGAAAAAACATG  
CCATGTCATGTCAATCAAGATCTTCTAGATTTTGGCGTTGAAGATTTTCTAGTTTTCTCAATCTATATAACCAGGAT  
GAACTCTGCCACCTCGAGAGTTGGGAGAAAAGAAAACAGGCTGGAACAGCTTAAATTTCTACGCAAGGGGAGTCTG  
ATAAATTGTTATCTCTCTGCTGCTGCCACCCTATCCACTCATGAACTCTCTGATGCTCGCATTGCATGTGCGAAA  
ACTATTGCGCTCGTACTTGTACTGATGACTTCTTTGATGTTGGAGCATCGAAAAGAACAAGAAAACCTCATA  
GCATTAGTAGAGAAGTGGGATCACCATGACGAAGTTGAGTTCTGCTCTGAGCAAGTAGAAAATAGTATTTTCTGCT  
TTTTATAGTACAGTTAAGCACATTGGAGAAAATGGCTTCCGCGAGTCAAAAAGCGCGATGTTACAAAACACCTGAAT  
GAAACATGGCTACATTACTTGGAGTCTGCAGCGACTGAGGCGGAATGGCAACGGAATCAATATGTCCAACAGTT  
GAGGAATACATGATAGAAGCGGTTAACTCATTGCGAGAGGGGCCATTATGCTAACATCACTATATTTTGTCCAA  
CAAAAACCTCGAGGAGTACATAATCAAAGACCCGGAGTACCATGAGTTGCTTAGAATAAAGGGCAACTGTGGCCGT  
CTCCTGAATGATACTAGGGGCTTCCGAGAGGGAGTCCAGTGAAGGAAAACCTGAACATCATCTCACTGCTTGTCTT  
CAGAGTGGAGGTTCCATGTCCATAGAAGCTGCTCAAGAGGCGGTACAGGAGTCTATAGCCTCATGTGCGGAGAGAC  
CTGCTAAGGATGGTTGTTAGAGAAGACCGTGTAGTTCTAGGGTATGCAAGGAGGTGTTCTGGAGGTTTTGCAGG  
ACAGTTCACCTGTTCTACTGTGACTGACGGATTTTCTCGCCCAAGGAAATGCTCCGCACGATGAACGCAATA  
TTCCGAGAGCCACTCAAACCTCAACATACCAGTCCTTTGGATGCTCAGTCAGAACAATAA

>TcGGPPS (truncated)\* (GenBank AF081514)

ATGGCTTCCCTATCAAGAATGCAATAGTATGAGGAGTTGTTTTAAATGACACCTTTTAAAAGTTTTTCATGGAGTG  
AATTTCAATGTTCCCTCACTGGGTGCTGCTAATTGTGAGATTATGGGTCACCTGAAACTTGGGTGATTGCCATAT  
AAACAATGTTCCGGTGTCTATAAATCCACAAAAACAATGGCCAGTTGGTTGATTTGGCTGAAACAGAGAAGGCG  
GAGGGAAAGGATATTGAATTTGATTTCAACGAGTATATGAAGTCCAAGGCTGTGGCAGTGGATGCGGCACCTGGAT  
AAGGCAATCCCACTTGAATATCCTGAAAAAATACATGAATCAATGAGTATTCCTTCTAGCAGGAGGTAAGCGC  
GTCAGGCCTGCTCTGTGCATTGCAGCATGTGAGCTTGTAGGAGGAGTCAAGGACCTTGCCATGCCAAGTGCCTGT  
GCAATGGAGATGATTACATACCATGTCTCTGATTGATGACTTGGCGTGCATGGATAATGATGATTTTCAAGA  
GGGAAGCCAACAATCACAAGGTCTTTGGAGAGGACACTGCTGTCTTGCAGGGGACGCCCTGCTTTTCAATTTGCA  
TTTTGAGCATATTGCTGTGGCTACAAGCAAGACTGTGCTTAGTATAGGACTTTAAGGGTGATATCTGAATTTGGGT  
AAGACAATAGGCTCTCAAGGGCTTGTAGGGGGCAGGTGGTTGATATTACATCCGAGGGGGATGCTAATGTGGAC  
CTGAAAACCTGGAATGGATTACATATAACAAGACTGCTGTGCTCTTGAATGTTTCAAGTTGTGAGTGGAGGGATC  
CTTGGTGGTGCTACAGAGGACGAGATTGCGAGAATTCGGCGGTACGCCCGGTGTGTGGGGCTTCTGTTTTCAGGTT  
GTGGATGACATACTTATGATGCTACTAAATCTTCTGAAGAATTTGGGAAAGACTGCAGGAAAGGATTTGCTTACTGAT  
AAGGCTACTTATCCCAAGTTGATGGGCTGGAGAAAAGCAAAAAGAAATTTGCCGCTGAATTTGGCGACGAGAGCCAAG  
GAAGAGCTGTATCCTTTGATCAGATAAAGGCTGCACCTTTGTTGGGTCTTGCAGATTACATTGCATTTCAGGCAA  
AACTGA

>TaOSC (5D)\* (TraesCS5D02G011800; GenBank ON108667)

ATGTGGAGGCTAAAGATCGCGGAGGGCAGCGGCAACCCACTGCTGCGCACCACCAACGGCCACGTCGGCCGGCAG  
GTATGGGAGTTTCGATCCTGCCGCGGATGACCCCGACGAGGTGCGCCCGCTTGATGCCGCCCGCCGCGACTTCACC  
AGCCGCCGGCACCAGATGAAGAACAGCTCCGACCTCCTCATGCGCATGCAGCTCTCTAAGTCAAACAATCTCAAG  
ATGAACCTTCCCTCCATCAAGCTGGAACAACATGGGTATCACACAGAAGAAGACGATGCTTGTATCTTTGAGG  
AGGGCAATCAACCGATGTTCCACTCTCCAGGCACATGATGGCCATTGGCCGGGGGATTACGCTGGCAGTTTATTT  
CTCTTGGCCAGCTTGATTGTAGCACTGCATGTGACTGGAGCACTAACTACTGTGTTGACATCTGAACATCAGAAA  
GAGATTCGGCGGTATCTCTACAATCATCAGAATGAAGACGGGGGTTGGGGACTGCATATCGAGGGAACAAGCACA  
ATGTTCTGTACTGTGATGAACATGTTGCTTTGAGATTGCTTGGGGAGGGGCTGGATTTCATGCGGAGCCATGCTA  
CAAGCTCGGAGTTGGATCTTGGATCATGGAGGAGCAACTTTAACACCATCGTGGGGAAAATTTCTTTCTTTCCGTC  
CTTGGGGTATATGACTGGTCCGGGAACAACCCATTGCCACCAGAATATGGATGATGCCTTATTTCTTGCCTATT  
CATCCAGGGCGCATGTGGTGTAAATGTGCGGTTGGTATATTTGCCCATGTCATACCTATACGGGAAGAGGTTTGTG  
GGTGCTACTACATCGATTGTAAGTACTGAGACTTGGAGAAAAGAGCTCTACAATGTCCCGTATAATGAGATTGACTGGGAC  
AAGGCTCGCAATGGGTGTGCAAAGGAAGATCTCTATTATCCCCATTACCCTACAGAATATTGTATGGGCCACT  
CTCAAGAAAATTTGGTGAACCGGTTCTTATGCACTGGCCTGGCAGCAATTTGCGAAAAGAAAGCTCTGGACATTGTC  
ATGAACATATAAAGTATGAGGATGAAACAACCTCAATATATATGCAATTGCTCCTCTCAATAAGATGTTGAATATG  
ATTTGTTGCTGGGTAGAAGATCCAAAGTCAGAGGCATTCAAACTCCATATTGAAAGAGTATATGATTTCTTATGG  
GTTGCAGAAGACGGCATGAAGATGAAGTCTTACAATGGCAGCCAGCTATGGGATACAGCTTTGACAGTTTCAGGCT  
ATATTTGCTACCGGCCTCACAAAAGAGTTTGGCCATACAATTAAGTTCGCTCATGACTATATCAAACATTTCCAG  
ATTCGTGCGGACTGCCCTGGAGACCAAAGCAAGTGGTATCGCCATCTATCAAAGGTGGATGGACACATTTCAACT  
GCTGACCAAGGGTGGCCTGTATCAGATTGTAAGTACTGCAGAAGCAATTAAGGTTTTGTTGTTGTTAACTAAGGTTCCCT  
GAACTGGTTGATGAGCCTATAGAAAACAAGCAGACTTGTGATGTCAGTCAACATTTCTACTGCTTTTGTGATGAATGAC

GATGGCAGTTTTGGTGCATATGAGCTAACAAAGATCTTATGAATGGCTTGAGTTGTTGAATCCTTCTGAGAGCTTT  
GGCGGCATAATGATCGAGTATCCGTATGTTGAGTGTACATCATCAGTAATTCAGGGTCTGGTGTATTTTAGAGAA  
ATGTACCCCAAACACATTCGCTTGAAGAGATAGACAGTTGTATCCAAAAGGCTGCAGACTACATTGAGAGCATC  
CAATGGAGTGATGGATCATGGTATGGTTGTTGGGCTATCTGTTTCACATATGGTACTTGGTTTTGGGGTGAGAGGA  
TTGGTTGCTGCAGGGAGGACGTATGTAAATAGCCTAGCAATCAGAAAAGCGTGTGAATTTCTTTTGTCCAAGGAG  
CTTCTCCCATCTGGAGGGTGGGGAGAAAAGTTACCTTTCCAGTCAAGACAAGGTTTACACCAATCTTGAAGGAAAC  
AGGGCTCATGCAGTTAACTAGTTGGGCCATGTTGGCCCTAATTGATGCCGGGCAGGGTCAAAGAGATCCTGCA  
TGTCTACATAGAGCAGCAAGATTCTGATGAACTTCCAATCAGAGGATGGAGAGTTCCCTCAGCAAGACATTATT  
GGAGCTACCAACCACAACCTTATGCTCACTTATGCCAGTTCAGGAACATATCCCTATCTGGGCTCTTGGAGAG  
TACTACCAGAGAGTGCTTCCGGTAGCTTAA

>TaHSD(5D)\* (TraesCS5D02G011900; GenBank ON108668)

ATGGATATGTGCCCGGTTGGCGGCTGCGACCGCCGGGAACCACGTCGTTTTGTGCGCGGTGACCGGTGGGCGGGGA  
TTCATGGCGAGTCACTGGTGACGGCGCTGCTCGGCTCGGGAGATTGGTGTGTGCGGATCACCGACCTTGGCCCC  
CAGGCTGCCCTGTCTCCTGCCGAGAGTGATGGACTCCTGGGCGCTGCCCTCCGCGATGGCCGCGCCGCTACTTC  
TCTGTGACGCTCTGCGAATTAGCCAGCTTACAAAAGCTTTGGAAGGGGTAGATACTGTTTTCCACACTGCTGCG  
GCGGATCATACCAACAACAACCTTCCAACCTTCAATTACAAGGTTAATGTGCGAGGGTACAAGGAATGTCATCGAGGCT  
TGTAACACATGCAAGGTTAAAACACTCATATATACTAGTTCCAGTGGAGTTGTATTTCGATGGAGTTCATGGCCTC  
TTTGGCGTAGACGAATCTACACCGTATCCAGATAAGTTTCCCAGCAGATACACAGAGACAAAGGCAGAAGCAGAA  
AAGATGGTGATAAAGTCCAACCGGAAGAAATGAGCTTCTCACTTGCTGTATACGTCCTGGCAGCATTTTTGGTCCCT  
GGAGACACGATAGTGCCAATTTTGTATCTTATGGAGGAATGATGATCATTTGTTGGTGTGCAAGAAATTTGTGAT  
GATTTTGTATATGTTGAGAATGTAGCGCATGGTTCATGTATGTGCTGAGAAAACCTTTTCTACCATAGACGGTGCA  
AAGAGAAGTGGAGGCAAAGCCTATTTTATAACAAATATGGAGCCTGTAATATGTGGGACTTTGTTTTATATGATT  
TTGGAAGAAGTGGATACAAAAGCCGATTCAAGATTAAGAATACCTTCATATTTTCTCAAGCCAATAACATATCTG  
GTAGATTGGAGCTACCATAATATATTCTCTCACTATGGAATGCGTCAACCTGGCATGCTAACCTCCGCAAGCATT  
AAGTATGCGACGCTGAATAGAACATTCAACTGCAACAATGCTGCTCAACAACCTGGTTACAAACCAATAGTGTCA  
CTCAAGGAGGGAGTAAAGATGACTACTGATTTCTACAGGCGATTAAGAGCATGA

>TaCYP51H35 (TraesCS5D02G012300; GenBank ON108669)

ATGGACTTAGCAAGTCTCACCGCAGTGTGGTGGGCTGTGGCTCTTCTTTTCATCACCGTGTAGTCACCAAGATT  
TCAAGAGCAAGAGTCAACACCGTTGATCTACATCGTACAACAGGTCAACTTCCCTCCCTGGTGAATGGAGTTGCT  
CTCCTAAAACCTATTACCTACCCTTTTGAACAAGGGTCTACCGCAATGGTGAATGATCTATATGTCAAATATGGC  
AGTGTATTCATGGTAAGTTCATTTGGAGTGAAGGTAACACTCTTGATCGGGCCAGAGGTGACGGCTCATTCTTC  
CAAGGTCTGGAGTCCGAGATTAGCCACGGTAATCTGTTTGGTTCAGTGTGCCATGTTTTGGTGAAGCAGTGGGT  
TATGGCAGAGATACCGCCACCCGAACCTGAACAAATGCGCTTCCATATCGAAGCACTGAGACCATCAAGTTGAGG  
AGCCATGTTTTATCCCATGCTTCAAGAAGTGGAGGGTACTTTGCAAAAATGGGGAGAGGAAGGCATTGTTGATCTA  
AAGCTTGAGTTCGAGAAGTACTCATGTTGATCTCAAGCAGATGTTTGGTTCGAAAAGAGGTTCCGGGAGAACATG  
TTTGATGAAGTCTACACACTTTTTTACGAGATTGAAGATAATGGTGTGACCTTGATTAGCTTCTTGTTCATAT  
CTCCCAACTCCAGCAAATCGGAAGCGAGATAAAGCGCGCATCAGGCTAACACAAATCCTTTCTGATGTGCTCGAT  
TCCCCTAAGAAGTCCGGCAGAGTTGAGGATGATACATTGCAGAAATGATCGACTCTAAGTACAAAGATGGTGC  
CCTACAACGGTAGAAGAGGTAGTCCGGCTAATCATTTGGCTGTTGTTTGTGAAAACACACCAGCTCTCACACT  
AGTACTTGACTGCAGCTTGTTTACTCAGCCATCCAACCTTTCTTGGAGCTGCCATTGAGGAGCAACAACAATC  
AGTAGCAAATACAAGGACATGGGGCTAGACTACAATGCATTTATAGAGATGGATACACTACATAGTTGCATCAAG  
GAGGCGCTAAGGAAGCACCCCTCCAACACCAATGCTGGTCCGACGGGCACATAAGCAATTCATGGTGAAGACGAAA  
GAGGGCAAAGAATATGACATCCCGCAAGACCACATCGTAGCAACTCCTACTATAGTACTAATAACATCTCTTAT  
ATCTATAAGGACCCCTCAGGTATATGATCCATGCCGGTTTGGCCCCGAAAAGAGAGAGGACAAAGTTGGTGGCAAG  
TTCTCTTACACGTCATTTAGTGGTGGAAAGACACATTTGACCCGGGGAGGCCTATGCTTACATGCAACTTAAAGTG  
ATATGGAGCCATTTGCTGAGGAACTTTGAGCTCGAATTGATCTCCCTTTCCCAAGACAGACTGGGGCAAGTTCT  
TTGCCAGAGCCACAAGGAAAACCTACTCGTAAAATATAAGAGGAATGGCATTTTGTAG

>TaCYP51H37 (TraesCS5D02G012000; GenBank ON108670)

ATGGAGATGGCAAGTAGCGCCAAGTGGTTTTGCTGTGGCTCTTGTTTTCATCACTGTGATCCTACTCAGGGTCATA  
AGAGGAAGGAGGATGGCCGCTGCTCCAGCCAGTGAGAAACCCTCCACCTGTGGTGAATGGTTTTGCGTTACTA  
GGACTTCTACCTAGGCTTCTTACAATGGACCTTCGAACCTAAGATAAAATGCTTGCACGATAAGTATGGCAGTGTG  
TTCACAGTTAGTCTTTTTGGACTAACTAATGTAACCTTTCTGATCGGCCCGGAGGTCCAATCCCATTTCTTTCAA  
GGGTTGGAGTCAGAGATTAACCATGGCAATCTTCTTGGATTCCTTGTGCCGATGTTTGGACAAGAGATAGGTCAA  
GGTGTGATGCAGCCACTCGGACTGAGCAGTCCCCTTTATCTCGATGCATTAAGCAATCCAAGTTGAGGAGA  
CATCTTGTATCCGATGCTTCAAGAGGTGAGAGCTACTTCGGCAAATGGGGCTGGAAGGAGTAGTTGATTTAAAA

CATGAGTTTGAAGAGTTGCTCATGTTGATATCAAGCCGGTGTCTACTAGGAAAAGAGTTCCGGGAGAAGATGTTT  
GATGAGTTCTATAAACTTTTTTCGTGATGTGCGAAAATGGAGTGAACATGATCAGTGTCTTCTTCCCATATATTCCA  
ATTCCTGCAAACCGTAGGCGTGACAAAGCACGTCTTAAGCTCATCGAATTACTTTCTGGAACGTGTGAGGTCACGT  
AAGAGCTCCCCCTCAGTGGAGGAAGATGTGCTACAAAGATTGATAGATTCCAAGTATAAAAGACGGCCGCTCCACA  
ACGGAAACAGAGGTAACCGGGATGATCATTGCATTGATCTTTGGTGGAAAAGCACACAAGTTCCCTCGCTAGTACC  
TGGACCGGAGCTTGCTACTCACTCATCCAAAGTTCTTAGCGGCTGCATCCCAGGAGCAAAGGAAATCATGATG  
AAATACAAGGACAAAATAGAATATGATGCCTTGTAGAGATGAATACCCTTCATAAATTGTATCAAAGAGGCACTT  
AGGCTGAACCCACCAACAACAATGTTGGTTCGCAAGGCACTTAAACATTTACAGTGCAGGACAAGACAAGGCCAA  
GAGTATGGCATTCCCAAGGGCATACTCTTGCAAGTCCATAATACAAAACAATTACTTGCCTTACATTTATAAG  
GACCCCGAGGTATATGATCCAGATCGGTTTGGTCCCCTAAGGCAGGAGGACATAGTTGGCGGCAAGTTTTCTTAT  
ACATCCTTTGGTGGTGAAGGCATTTTTGCAGTGGGGATGCCTATGCTTACATGCAAGTTAAAGTTATATGGAGC  
CACTTGCTCAACAACCTTTGATCTCAAATTATTATCTCCTTATCCCAAGACTGACTGGAGTAAGTTAATCCCAGAG  
CCTCAAGGGAATATGATGGTCAGCTACAAGAGACGCCAGCTGCTAGGCTAG

>TaCYP51H13\_5A (TraesCS5A02G004600; GenBank ON108671)

ATGGACTTGACAAGTCTCACTACGATGTGGTGGGCCATAGCTCTTCTTTCCATTACTGTATTGGCCACCAAGATC  
ACAAGAGCAAGAATCAAAAACATTGATCCACAGCGTACAACAGGCCAACTTCCACCCATGGTGAATGGACTTGCT  
CTCCTAGGATTATTACCTACCCTTCTGAAGAAGGGTCTACCACCTATGTTCAATTATCTATATGTTAACTATGGC  
AGTGTCTTCACTGTAAGTTGCTTTGGAGTGATCAAGGTAACACTCTTGATCGGGCCAGAGGCGACGACTCATTTT  
TTCCAAGGTTTGGAGTCAGAGATTAGCCATGGTAATCTGCTTGAGTTTACAGTACCCATGTTTGGCAAGGCAGTT  
GGTTATGGTAGAGATACCGCCACCCGAATGGAACAAATGCGCTTCCACAGTGAAGCACTGAGGGCATCCAGGTTA  
AGGAGCCATGTTTCTCCAATGCTTCAAGAAGTGGAGGATTTCTTTGCAAAGTGGGGAGAGGAAGGCGTAGTTGAT  
CTAAAGCTTGAGTTCGAGCAGCTACTTATGTTGATATCAGGCCGATGTTTGTGTTGGAAAAGAGTCCGGGAGAAT  
ATGTTTGTATGAAGTCTACACACTTTTTTCGCGAGATCGAAAAGGGTGTGACCTTGATCAGCTTCTTGTTCATAT  
CTCCCAACTCCAGCAAACCGGCAGCGTGATAGGGCACGTATAAGGCTAACAGAGATCCTCTCTAATGTTGTGCGAG  
TCCCCTAAGAGCTCCGGGCGAGTGGAGGAGGACACGCTGCAGAACTGATTGACTCCAAGTACAAAGATGGTTCG  
CCTACAACAGTAGAAGAGGTAGCCGGGTTGATCATTGGCTTGCTGTTTGTGTTGGAAAACACACCAGCTCTCATACT  
AGTACTTGGACTGGAGCTTGTCTTCTCAGCCATCCAGCCTTCTTAAGAGCTGCCATTGAGGAGCAACATCAAGTC  
GCCAAGAAATACAAGGACGGACCAGAATACAATGCCTTCTTAGAGATGGATACGCTGCATAATTGCATCAAGGAG  
GCGCTGCGGAAGAACCCTGCAACACCCTGCTGGTTCGCAAGGTTCCATAAGCGCTTACGGTGCAGACGAAAGAA  
GGCCAACAATATGACATCCCGCAGGACTACATCGTAGCAACTCTACTATAGTAAACAATTATATCCCTTACATT  
TATACGGACCCTCAGGTGTATGATCCAAATCGGTTTGGCCAGAAAAGAGAGGACAAAGTGGGTGGCAAGTTC  
TCTTACACATCATTTGGTGGTGAAGGCACGTTTGCAGTGGAGAGGCTTATGCTTACATGCAACTCAAAGTGATA  
TGGAGCCATTTGCTGAGGAACTTTGATCTCGAATTGGTCTCTCCCTTCCCTAACACAGACTGGAGCAAGTTCTTG  
CCAGATCCAAAGGAAAAATTACTCGTGAGATATACGAGAAATGGAATTTAA

>TaCYP51H13P (TraesCS5D02G012100/200; GenBank ON108672)

ATGGACTTGACAAGTCTCACTGCCATGTGGTGGGCCATAGCTCTTCTTTTCATTACTGTATTGGCCACCAAGATC  
ACAAGAGCAAGAATCACCAACATTGATCCACAGCGTACAACAGGCCAACTTCCACCCATGGTGAATGGACTTGCT  
CTCCTAGGATTATTACCTACCCTTCTGAAGAAGGGTCTACCACCTATGGTCAATTATCTATATGTTAACTATGGC  
AGTGTCTTCACTGTAAGTTGCTTTGGAGTGATCAAGGTAACACTCTTGATCGGGCCAGAGGCGACGACTCATTTT  
TTCCAAGGTTTGGAGTCAGAGATTAGCCATGGTAATCTGCTTGAGTTTACAGTACCCATGTTTGGCAAGGCAGTT  
GGTTATGGTAGAGATACCGCCACCCGAATGGAACAAATGCGCTTCCACAGTGAAGCACTGAGGGCATCCAGGTTA  
AGGAGCCATGTTTCTCCAATGCTTCAAGAAGTGGAGGATTTCTTTGCAAAGTGGGGAGAGGAAGGCGTAGTTGAT  
CTAAAGCTTGAGTTCAGCAGCTACTTATGTTGATATCAGGCTGATGTTTGTGTTGGAAAAGAGTCCGGGAGAAT  
ATGTTTGTATGAAGTCTACACACTTTTTTCGCGAGATCGAAAAGGGTGTGACCTTGATCAGCTTCTTGTTCATAT  
CTCCCAACTCCAGCAAACCTGGCAGCGTGATAGGGCGGTATAAGGCTAACAGAGATCCTCTCTAATGTTGTGCGAA  
TCCCCTAAGAGCTCCGGGCGAGTGGAGGAGGACACGCTGCAGAACTGATTGACTCCAAGTACAAAGATGGTTCG  
CCTACAACAGTAGAAGAGGTAGTCGGGTTGATCATTGGCTTGCTGTTTGTGTTGGAAAACACACCAGCTCTCATACT  
AGTACTTGGACTGGAGCTTGTCTTCTCAGCCATCCAGCCTTCTTAAGAGCTGCCATTGAGGAGCAACATCAAGTC  
GCCAAGAAATACAAGGACGGACTAGAATACAATGCCTTCTTAGAGATGGATACGCTGCATAATTGCATCAAGGAG  
GCGCTGCGGAAGAACCCTGCGACACCCTGCTGGTTCGCAAGGTTCCATAAGCGCTTACGGTGCAGACGAAAGAA  
GGCCAACAATATGACATCCAGCAGGACTACATCGTAGCAACTCTACTATAGTAAACAACAATATCCCTTACATT  
TATACGGACCCTCAGGTGTATGATCCAAATCGGTTTGGCCCCGAAAAGAGAGGACAAAGTGGGTGGCAAGTTC  
TCTTACACATCATTTGGTGGTGAAGGCACGTTTGCACCGGAGAGGCTTATGCTTACATGCAACTCAAAGTGATA  
TGGAGCCATTTGCTGAGGAACTTTGATCTCGAATTGGTCTCTCCCTTCCCTAACACAGACTGGAGCAAGTTCTTG  
CCAGATCCACAGGAAAAATTACTCGTGAGATATACGAGAAATGGAATTTAA

>AtCYP51H35 (AET5Gv20012700; GenBank ON108673)

ATGGACTTAGCAAGTCTCACCGCAGTGTGGTGGGCTGTGGCTCTTCTTTTCATCACCGTGTAGTCACCAAGATT  
TCAAGAGCAAGAGTACCACCGTTGATCTACATCGTACAACAGGTCAACTTCCTCCCCTGGTGAATGGAGTTGCT  
CTCCTAAAACCTATTACCTACCCTTTTGAACAAGGGTCTACCGCAATGGTGAATGATCTATATGTCAAATATGGC  
AGTGTATTTCATGGTAAGTTTCATTTGGAGTGAAGGTAACACTCTTGATCGGGCCAGAGGTGACGGCTCATTTCCTC  
CAAGGTCTGGAGTCGGAGATTAGCCACGGTAATCTGTTTGGAGTTCCTGTGCCATGTTTGGTGAAGCAGTGGGT  
TATGGCAGAGATAACCGCCACCCGAACCTGAACAAATGCGCTTCCATATCGAAGCACTGAGACCATCAAGGTTGAGG  
AGCCATGTTTATCCCATGCTTCAAGAAGTGGAGGGTACTTTGCAAAAATGGGGAGAGGAAGGCATTGTTGATCTA  
AAGCTTGAGTTCGAGAAGTTACTCATGTTGATCTCAAGCAGATGTTTGTGCTCGGAAAAGAGGTTCCGGGAGAACATG  
TTTGATGAAGTCTACACACTTTTTTACGAGATTGAAGATAATGGTGTGACCTTGATTAGCTTCTTGTTCATAT  
CTCCCAACTCCAGCAAACCGGAAGCGAGATAAAGCACGCATCAGGCTAACACAAATCCTTTCTGATGTCGTCGAT  
TCCCGTAAGAACTCCGGCAGAGTTGAGGATGATACATTGCAGAAAATGATCGACTCTAAGTACAAAGATGGTCGC  
CCTACAACGGTAGAAGAGGTAGTCGGGCTAATCATTGGCCTGTTGTTTGTGCTGGAAAACACACCAGCTCTCACACT  
AGTACTTGACTGCAGCTTGTTTACTCAGCCATCCAACCTTTCTTGAGAGCTGCCATTGAGGAGCAACAACAAATC  
AGTAGCAAATACAAGGACATGGGGCTAGACTACAATGCATTTATAGAGATGGATACACTACATAGATGCATCAAG  
GAGGCGCTAAGGAAGCATCCTCCAACACCAATGCTGGTCCGCAGGGCACATAAGCAATTCATGGTGAAGACGAAA  
GAGGGCAAAGAATATGACATCCCGCAAGACCACATCGTAGCAACTCCTACTATAGTGACTAATAACATCTCTTAT  
ATCTATAAGGACCTCAGGTATATGATCCATGCCGGTTTGGCCCCGAAAGAAGAGAGGACAAAGTTGGTGGCAAG  
TTCTCTTACACGTCATTTAGTGGTGGAAAGACACATTTGCACCGGGGAGGCCTATGCTTACATGCAACTTAAAGTG  
ATATGGAGCCATTTGCTGAGGAACCTTTGAGCTCGAATTGATCTCCCCTTTCCCAAGACAGACTGGAGCAAGTTC  
TTGCCAGAGCCACAAGGAAAACCTACTCGTAAAATATAAGAGGAATGGCATTTTGTAG

>AsOSC1\* (AS01G014480; GenBank ON108674)

ATGTGGAGGCTGAAGATCGCGGAGGGCGGGCAACCCGCTGCTGCGCACCACCAACGGCCACGTTGGGCGGCAG  
GTGTGGGAGTTTCGATCCTGCCGCTCCGACGATGACCCCGACGAGATCGCGGCCGTAGACGCCGCGCGCCGCGAG  
TTCACCGGCCGCGCCATCAGATTAAGAACAGCTCCGACCTCCTCATGCGCATGCAGTTCTCCAAGACAAACGCT  
CTCAAGATTAACCTTCCCTCATGTCAAGCTGGCAGAGCATGAATATGCAACAGAAGAGGATGTCCCTCATATCTTTG  
AAGAGGGCAATTAGCCGCTATTCCACTCTCCAGGCACATGATGGGCACTGGCCGGGGGATTATGCAGGCACTTTA  
TTTCTCTTGGCCAGCTTGATTGTAGCATTGCACGTGACTGGCGCACTGACTACAGTCTTGACATCTGAACATCAG  
AAAGAGATCCGGCGATATCTCTACAATCATCAGAATGAAGATGGAGGCTGGGGACTGCACATTGAGGGAACAAGC  
ACAATGTTCTGTTCTGTCATGAACATATGTTGCTTTGAGATTGCTTGGGGAAGGGCTGGATTTCAGGTGGAGCCATG  
CTGCAAGCTCGTAGTTGGATCTTGGACCATGGAGGAGCAACTTAAACACCATCTTGGGGCAAATTTCTTTCTATCG  
GTCCTCGGGGTATATGACTGGTCTGGAAACAACCCATTGCCACCAGAAAATATGGATGCTTCCCTATTTCTTGCCT  
ATTCATCCAGGACGATATGTGGTGAATTTGCCGACTAGTATATTTGCCAATGTCGTACTTATATGGGAAGAGTTT  
GTGGGTTCTATGACATCAATTGTCCTAGACTTGGAGAAAGAGCTGTACAATGTCCCATACGATGAGATTGACTGG  
GACAAGGCTCGCAATGGATGTGCCAAGGAAGATCTCTATTTATCCCCATTCACCGCTGCAGGATATCGTGTGGGCT  
ACTCTCAAGAAAATTTGGTGAACCAGTTCTCATGCACTGGCCTGGCAGCAAATTCGGGGAGAAAGCTCTGGACATT  
GTGATGAAACATATTGAGTACGAGGATGAAACAACAATATATATGCATTGCTCCTATGAATAAGATGTTGAAT  
ATGATTTGCCGTTGGGTAGAAGATCCGAACCTCAGTGGCATTCAAACCTCCATATTGAAAGAGTATATGATTTCTTA  
TGGGTCGCTGAAGACGGCATGAAGATGAAGTCTTATAATGGCAGCCAGCTGTGGGATACAGCTTTGACTGTTCAA  
GCTATATTTGCTGCCGACTCACAGAAGAGTTTGGCCAGACAGTTAAACTTGCAGCATGACTATATCAAGCGTTCC  
CAGATTCGATGGACTGTCTGGAGATCAAAGTAAATGGTATCGTCATATATCTAAAGGTGGATGGACACATTC  
ACAGCTGACGAAGGGTGGCCTGTATCAGACTGTAAGTGCAGCACTGAAGGTTTTATTGCTGTTAACTAAGTTT  
CCTCCTGAATTTGGTGGTGAATCTATAGAAGCAAGCAGGCTTGTGATACAGTCAACATTTTGTGCTGCTTTGATG  
AACGACGATGGTAGTTTTGGTGCATATGAGCTAACAAGATCTTATGAATGGCTTGAGTTGCTCAATCCTTCTGAG  
AGCTTTGGGGCATAATGATCGAGTATCCATATGTTGAGTGTACGTCATCAGTAATTCAGGCTTGTGTTATTC  
AGAGAAACCTACCGTAAACATTTATCGCAGGGAAAGAGATAGACCATTGTATCCGAAAGGCTGCAGACTACATTGAG  
AGCATCCAACGAAGTATGGATCATGGTATGGCTGTTGGGCAATTTGTTTACCTATGGTACATGGTTCCGGGGTG  
AGAGGATTGGTTGCTGCCGTTAGGACGTACAAAAACAGCCAAGCAATCAGAAAAGCGTGTGAATTTCTGCTATCT  
AAGGAGCTTCTTCCGTCAGGAGGATGGGGAGAAAAGCTACCTCTCTAGTCAAGACAAGGTTTTACACCAATCTTGAA  
GGCAGCAAGGCTCATGCAGTTAACACCAGTTGGGCCATGTTGGCCCTGATTGATGCTGGGCAGGGTAAAAGGGAC  
CCTGCATGTCTACATAGAGCAGCCAAGGTTCTGATCAATTTCCAATCCGTTGGATGGAGAGTTCCCTCAGCAAGAC  
ATTATCGGAGCTACCAACCACAACCTCATGCTCACTTACGCCAGTTTCCAGGAACATCTTCCCTATCTGGGCTCTT  
GGGGAGTATTATCGCAGAGTGTGATAGCACAAAGGCTCTAA

>CYP51H73\* (AS01\_002578\_0375348; GenBank ON108675)

ATGGACATGACAAGTGGCGCCCTGTGGTTTACCTTGCTCTTGTTTTCATCACTCTCCTACTGAGGCTTATACAA  
CGAAGGATTGCCGTTGCTCCAACCAGTAGAAACCCACTTCCACCAGTGGTGAATGTTTTGCTTTGCTGCGAATT  
TTACCTAGCCTTTTTGGAAAGGATCTTCCAACGAAGATAAATTTTCTATATAAGAAGTATGGCAGTGTGTTTACA  
ATTAGTCTATTTGGACGTCATGTAACCATTCTGATCGGACCGGAGGTATCAGCTCATTCTTTCAAGGGTTGGAT  
TCAGATATTAGCCATGGCAACTTTCTTGTGTTTACTGTACCCATGTTTGGGCAAGAGGTTGCTTATGGCCTTGT



ACGGCAACTCGGAATGAGCAGTCTCGTTTCTATCTTGAAGCATTAAAGCAATCAAAGTTGAGGGGACATTTCCAT  
CCCATGCTTCAAGAGGTGGAGGAATACTTTGGCAAATGGGGCGAGGAAGGCATTGTTGATTTAAAACATGAATTT  
GAAGAGATACTCATGTTGATCTCAAGCCGTTGTCTACTAGGAAAAGAGGTCCGGGAGAATATGTTTGAGGATTTT  
TATGCACTGTTCCGTGATATCGAAAATGGAGTGAACCTGGCCAGTGTCTTTTCCCATACATCCCAATTCAGCA  
AACCGCAGGCGTGACAAGGCACGTATGAAGCTAATAGAAAATATCTCTCAAATTATGAGATCACGTGAGAGCTCT  
AGCAGGGTTGAGGAGGACGTGCTACAGAAATTGATGGATTCTAAGTATAAAGACGGGGCTCCACAACCAAAACA  
GAGGTAACAGGACTGATAATTGGGTTGATCTTTGCTGGAAAGCACACAACCTCTCAAGCTATAACCTGGACTGGG  
GCTGACCTACTTAGCCATGAAAAATTCTTAGCAGCTGCATCCGAGGAGCAAAAAGGAAATCATGATGAAATACAAG  
GGCAAATAGAAATATGATGCCTTGCTAGAGATGAGTACCCTTCATAGGTGTATCAAAGAGGCACCTCGGATGCAC  
CCACCAGGACCAATGTTGATTTCGCAAGGCACATAAAAAATTTACGGTCCGAACAAAAGAAGGACAAGAGTATGAT  
ATTCCGAAAGGGCATAGCATTGCAAGTCTATAGTGCAAAAACAATAGGATGCCTTACATTTATAAGGATCCTCAT  
TTGTATGACCCAGATAGGTTTGGTCCGGCAAGACGAGAGGACGTAGTTGGCGGCAAGTTCTCTTACACATCTTTT  
GGCGCTGGAAGGCATTCTTGCGTTGGGGAGGCCTATTCTTATGTGCAAATTAAGTCAATATGGAGCCATCTACTG  
AACAACTTTGATCTCAAATATTGTCCAGTTATCCTAAAACTAATTGGAATAAGCTAATCCCAGAGCCTCAAGGA  
AGTATGATGGTCAGCTACAAGAGACGTCCGGCTACCGGGCTAG

>BdOSC2 (Bradi3g22802; GenBank ON108676)

ATGTGGAAGCTAAAGATCGCAGAGGGGTGCGGCAACCCGCTGCTGCGCACCACCAACGATCACACTGGCAGGCAG  
GTATGGGAGTTTCGACCCTGACGACTCCGTCGACGAGTCTCCAGCCGTGGAAGCCGCCCGCAGTTCTCCAGC  
CGCCGGAATCAGACCAAGAACAGTTCTGACCTCGTCATGCGCATGCAGTTCTCCAAGTCTAACCCTCTCAAGATG  
AACCTTCTGCCATCAAGCTGGATGAGCGTGCATTGCCACGGAAGAGGATGTCTTGATATCTTTGAAGAGGGCA  
ATCGGCCGCTATTCCGCACTCCAGGCACATGATGGGCACTGGCCGGGAGATTACGCAGGAACCTCTGTTTCTCTTG  
CCTAGCTTGATTGTAGCATTGCATGTGACTGAATCACTCAATACTGTGTTGTTCATCTGAACATCAGAAAGAGATG  
CGGAGATATCTCTACAATCATCAGAATGAAGATGGGGGCTGGGGACTGCACATTGAGGGAACAAGCACAATGTTT  
TGTTCTGTTCATGAACACTACGTCGCTTGAGATTGCTTGGGGAAGGGCTGGATTCTGTGTGGAGCCATGCTGCAAGCT  
AGGAGTTGGATCTTGGACCATGGGGGGGCAACTTTAACACCATCTTGGGGGAAATCTTCTCTTTCGGTCTTGGG  
GTATATGAATGGTCTGGCAACAACCCATTGCCACCAGAAATATGGATGATGCCTTATTTCTTGCCTATTCATCCA  
GGGCGCATGTGGTGTAAATGCCGCTGGTATATTTGCCCATGTCATACCTATATGGAAAGAGGTTCTGTGGGAGCT  
ATTACATCATCAGTTGTAAGTACTGACTTGGAGAAAGAACTTTACATTTGTGCCATACGATGAGATTGACTGGGACAAG  
GCTCGCAATGGCTGTGCAAAGGAAGATCTCTATTATCTCATTACCGCTGCAGGATGTGGTATGGGCTACTCTG  
AAGAAAGTTGGCGAGCCACTTCTTATGCACTGGCCTGGCAGCAAATGCGGCAGAGAGCTCTGGACGTTGTTCATG  
GAACATATCCGTTACGAGGATGAAACAACCTCAATATATCTGCATTGCTCCTCTGAACAAGATGTTGAATATGATT  
TGTCGCTGGGTAGAAGATCCAAACTCAGAGGCATTCAAGCTCCATATTGAAAGAGTCTACGATTTCTTATGGGTC  
GCTGAAGACGGCATGAAAATGAAGTCATACAATGGCAGCCAGTTGTGGGATACGGCTTTAACAGTCCAGGCTATT  
TTTGCTACCGGCTCACAGAAGAGTTTGGCCCCACAATTAAGTACTAGCCATGACTACATCAAACGTTCCAGATT  
CGTGTGACTGTCTGGAGACCAGAGCAAGTGGTATCGCCATATATCCAAAGGTGGCTGGACGCACCTCAACTGCT  
GACCAAGGGTGGCCTGTATCAGATTGACTGCAGAAGCATTGAAGGTTCTGTTGCTGTTAACTAAGGTTCTCTCT  
GAATTGGCTGGTGGCCTATGGAAGCCAGCAGGCTTGATGATAGTGTCAACCTTCTGTTATCTCTGATGAACGAG  
GATGGCAGTTTTGGTGCATATGAGCTGACAAGATCTTATGAGTGGCTTGAGTTGCTCAATCCTTCTGAGAGCTTT  
GGGGGAATAATGATCGAGTATCCGTATGTTGAGTGTACATCATCAGTAATTCAGGGGCTGGTGTATTCAGAGAA  
ACATAACCTAAACACTGTGCGAGGGAAGAGATAGACAACCTGTATCCGGAAGGCTGCAGATTACACAGAGAGCATC  
CAACGTGCCGATGGATCATGGTACGGCTGTTGGGCTATCTGTTTACCTATGGTACATGGTTTGGGGTGAGAGGA  
TTGATTGCTGCCGTTAGGACTTACAAGAACAGCCAATCAATCAGAAAAGGCGTGCGAATTTTTGCTGTCCAAGGAG  
CTCCCATCAGGAGGATGGGGGAAAGCTACCTCTCCAGTCAAGATAAGGTTTACACCAATCTTGAAGGCAACAAG  
GCTCATGCAGTTAACACCAGTTGGGCCATGTTGGCCCTGATTGATGCTGGACAGGGTAAAAGAGATCCTGCATGT  
CTGCATAGAGCAGCCAAGGTTCTGATCAACTTCCAAATGGAGGATGGAGAGTTCCCTCAGCAAGACATCATCGGA  
GCTACCAACCACAACCTCATGCTCACTTACGCCAGTTTCAGGAACATCTTTCCGATCTGGGCTCTTGGAGAGTAC  
CATCGCAGAGTTCTGCAAGCACAAAAGGCATAA

>BdCYP51H14 (Bradi3g22820; GenBank ON108677)

ATGTTTCATGACAAGTAGCGCCATGTGGTTCACCGTGTCTCTTGTFTTTCATCACCATCGTGCTCATCAGGATCATC  
AGAGGGAAGGCAGCTGGTGGTGTGATCCAACCTCTGGGAAACAACACCCGCTGTGGTGAATGGCTTTGCTTTA  
CTAGGACTTTTACCTAGGCTTTTGAACAAGGATCTTCCAATAAGATAAAATGTCTATATAGTAAGTATGGTAGC  
GTGTTACCGGTAAGTCTGTTTGGACGGAACGTAACCTTCTTGATCGGGCTGAGGTCTCAGCTCATTTCTTTCAA  
GGATTGCACTCAGAGATTAGCCATGGCAATCTTCTTGAGTTCACTGTCCCCATGTTTGGCCATAAAGGTTGAGATC  
GGTGTGATCAGACCCACTCGGAATGAGCAGGCTCCGTTCTATCTTGACGCATTAAGCAATCAAAGTTGAGAAGC  
CATTTTGTATCCCATGCTTCAAGAGGTAGAGGAATACTTTAGCAAATGGGGGCGAGGAAGGCATAGTTGATCTGAAG  
CACGAATTTGAGCAGTTACTTATGTTGATCTCAAGCCGATGTCTACTCGGCAAAGAGGTCCGAGAGAAGATGTTT  
GACGAGTTCTATAACCTGTTTTCGTGACATTGAAAACGGTGTGAACTTGGTCAGTGTCTTCTTCCCATATATCCCA  
ATCCCAGCAAACCGGAGACGCGACAGAGCACGCGTGAAGCTCATTTGAGCTGCTCTCTGAAATCGTGAGGTCACGT

AAGAGCTCAGGCAGAGTGGAGGAGGACGCCCTGCAGAACTGATAGATTCCAAGTACAAAGACGGCCGCTCCACA  
AGCGAAACAGAAGTCAACGGGATGATAATTGGACTGATCTTTGGGGGAAAACACACAAGCTCTCATGCCACTACC  
TGGACCGGAGCCTGCCTACTCAGCCATGAGAAGTTCTTAGCAGCCTCATCCGAAGAGCAAAAGCAAATCATGAAG  
AAATACAAGGGGAGATTAGAATATGAAGCTCTGTTAGAGATGAATACACTCCATAGTTGCATCAAGGAGGCGCTT  
CGGATGCACCCGCCATCGCCGATGCTGGTTCGCAAGGCAAATAAGCATTTCCTACTGTGAAGACAAGAGAGGGCCAG  
GAGTATGATATTCCAAAAGGGAATACTATTGCAAGCCCTATAGTACAAAACAATATCATGCCATACATTTATAAG  
GACCCTCACTTGTATGATCCAGATAGGTTTGGACCCGCGAGGCAGGAGGACGTAGCTGGTGGGAAATTCCTTAC  
ACGTCTTTTGGAGGTGGAAGGCATGTCTGCGTTGGCGAGGGCTATGCTTACATGCAGATTAATAATCATATGGAGC  
CATTTGCTCAAGAACTTTGAGCTCGAGTTGCTGTCTCTTTTCCCAACACCGATTGGAATAAGTTAATCCCAGAG  
CCTCAAGGGAATATGATGGTTAGCTATAAGAGACATCGGCTGTTGGGCTAG

>BdCYP51H15 (Bradi3g22840; GenBank ON108678)

ATGGACTTGGCAAGCACAGCCGCCGTGGGATGGGCGCTCGCTCTTCTTCTCATCACTGCTTTAGCTACCAAGATA  
GCAAGAGCAAGAATCACCATTTGTCGATCCACCGCGTACGACGACGACGACTCAACCTCCACCCGTGGTGAAT  
GGCATCGCTCTCCTAAGACTGTTACCCACCCTTTCCAAGAAGGGTCTGCCGGCCATGGTGAACGATCTGTATCTG  
AAGTTCGGCAGCGTGTTCATGGTAAGCGTGTTTGGGATCAAGGTAACGATCTTGATCGGGCCAGAGGTGACCCCT  
CACTTCTTCCAAGGTCTGGAGTCGGAGATTAGCCACGGTAATCTGCTTGAGTTCACCGTGCCCATGTTTGGCGAA  
GCGGTTGGTTACGGCAGAGATGCCGCCACCCGAATTGAACAGACCCGCTTCCACATCGAGGCGCTGAGGCCATCC  
AGGTTGAAGAACCACGTCTATCCCATGATTCAGAGGTCGAGGACTATTTGCAAAAATGGGGAAACGAGGGCATA  
GTGGACCTAAAGCTTGAGTTCGAGCGGTTACTCATGTTGATCTCAAGCCGAGTTTACTCGGAAAAGAAGTTAGA  
GAAACCATGTTTGATGAGGTCTACACACTGTTTCGTGAAATCGAAAACGGTGTGACCGTATCAGTTTCTTATTT  
CCATATCTCCCGATTCCAGCAAACCACCGGCGAGATAGAGCGCGCACCAGGCTCACAGAAATACTCTCCGATGTC  
GTCAAGTCGCGTAAGAACTCAGGCAGGGTTGAGGAGGACACACTCCAAAAATGATAGACTCCAAGTATAAAGAT  
GGCCGCTCCACAACCGTACCAGAGGTTGTCGGGTTGATCATCGGTCCTATTTGCTGGAAAACATAACCAGCTCT  
CACACCAGCACCTGGACTGGAGCCTGTTGCTTAGCCACCCAATGTTCTTAAGAGCTGCCATTGAGGAGCAAAAA  
CAAATCGGTAGGAAATATAAGGATGGGCTCGGCTACGATGCTATGTTAGAGATGGATACCCTGCATAGTTGCATC  
AAGGAGGCGCTAAGGATGCACCCCTCCAACGCCAATGCTGGTTCGCAAGGCACATAAGCACTTTACGGTGCAGACG  
AAACAAGGCAAACAATATGACATCCCAGAAGGGCACACCGTAGCGAGTCTTATGTTAGTCAACAATAATATCCCC  
TATATTTATAAAGACCCAGAGGTTTATGATCCAGACCGGTTTGGTCCCAAAGACAAGAGGACAAGGTAGGTGGC  
AAGTTCCTTATACGTCCTTCAGTGGTGAAGGCACACTTGCCTGGTGGAGGCTATGCTTACATGCAAATTAAG  
GTGATATGGAGTCATTTGCTAAGTAACTTTGAACTCAAATGATCTCACCTTTCCCAAGACAGATTGGAGCAA  
TTCTTACCAGAGCCAGAAGGAACATTTGTTTGAAGATATAAGAGAAATGGCTGCCGTGCTAGCACTTAG

>BdCYP51H16 (Bradi3g22850; GenBank ON108679)

ATGGAATTTACAAGTGGCGACGTGTGGTTCGCCGTAGCTGTTCTCTTAATTGCTACGGTCGTCACCAAGATTGCA  
ATTGCAAGAGCTACCGTTGATCCAACGTGCACAAGACCACTTCCACCTGTGGTGAAGGGCGTTGCTCTCCTTGGGA  
CTTCTACACGCCCTTGTTACCAAGGATCTACCAACTGTGATACATGATCTGTATGAAAAATTTGGCAGTGTGTTT  
ACAGTAAGCTTGCTTGACAAAAGGTGACCTTCTTGGTTCGGGCCAGAGGTGTCGGGCCATTTCTTCAAAGGGTTG  
GAGTCAGAAATTAACATCGGCAATCTGCTGAATTTACCGTGCCCATATTTGGTCAAGAGGTGGGTTACGGCGTG  
GATCTCGCAACTCGGAATGAGCAGGCCCGATTCTGCCTTGATGCACTGAAGCCGTCCAAGTTGAGGAGCCATGTT  
GACCCCATGCTTCAAGAAGTAGAGGACTTTGCAAAAGTGGGGACAACATGGGATAGTTGATTTAAAACATGAG  
TTTGAGGTGTTACTCATGTTGATCTCAAGCCGGGTTCTACTCGGTAAAAGAGGTCCGGGAGAAGATGTTTCGATGAG  
TTCTGCACATTATTTGGTCAGATCGAAAACGGGGTGAACCTTGTGAGTGTCTTCTTCCCATACATCCCAATTCCA  
TCAAACCAGAGACGCGACAGAGCACGCGTCAAGCTCACACAGATACTATCTGAAGTTGTGAGTTTCGCGCAAGAGC  
TCCGGCCGAGTTGAAGAGGATACGCTGCAGAGACTCATCGATTCCAGGTATAAAGACGGCCGATCCACAACGGAA  
GCAGAGATCACCGGGATGATAAATTGGCATGCTCTTCGCTGGGAAAACACACGAGCTCTCACACTACTATCTGGACT  
GGAGCATGCCTCCTTAACAGTCCCAAATTCCTGGCTGCTGCTGTCGAGGAGCAAAGGAACCTGTTGTGAAATAC  
AAAGACCAGATCGACTACAATACCTTGGCAGAGATGGATGCCCTCCATTGCTGCATCAAAGAGGCACCTCCGGATG  
CACCTCCGTCGCCCCTGCTGGTCCGCAAGGCACAGAAGCAGTTTACCCTGAAGACGAAAGAAGGTAACGAGTAT  
GACATCCCAAGGGGGCATAACCATTTGCCAGCCCTACGATAGTTAACAAACAATATGCATTACATTTATAAGGAGCCC  
CAAGTGTATGATCCGGATCGTTTTTGGCCCTGGAAGAGAGGAGGACATAGTTGGTGGCAAGTTCTCTTACACGTCA  
TTTGGCAGCGGAAGACATGCTTGCATTGGCGAGTCATATGCTTACATGCAAATTAATTTGATATGGAGCCATTTG  
CTGAGGAATTTTGGCTTGAAGTGGTTTCTCTCTTTCCCGAGGACAGACTGGAACAAGATTGTGCCAGGACCTCAA  
GGGAAGGTCATGGTAAGTTATAAGAGATCGAGGATGTCAGCCTAG

>BdACT\* (Bradi3g22830; GenBank ON108680)

ATGTCTGTTTTCCGTATCTAAATCTTCTCCAGTAGTAGTCAGACCAAGTTCAGAGCCTGCAACTTCTACTGCAGGT  
AATTTGCTTAAGCTCAGCAGTTATGATAAGAACCATATGTGTATCCCTGTTACTATGTTCTTGGTCTTTTGATAAC  
CCAATTAATGAACCTGCTGAAACCATTAAATCTGCGTTGTCTCAAGCATTGGTACCATATTTACCATTTTCTGGG  
AGACTTGCAGCTGAAAATAATGCAGTGCATATAACTTTCCGGTGGAGATGACCAAGGGGTATCTTTTGTGTCAGCA  
GCAGCATCATGTGGCTCAAAGAGGTTGACTTATCAGATAGGTCCAGCCCCCTTAACATCCCATTTGTTAGATGAA

CTGGCAGTCTATTATCCAGCCGCCGCTTGTGGATTTGGTGATCCTCTCCTTCTTATGCAAGTTACAGAATTTACA  
TGTGGCGGATTTGTAGTTGGTGTACATGGAATCATGTAATAGCTGATGCTGCCGGAATGGGTCAATTTCTTAGG  
GCTGTGGGAGAAAGAGCAAGGGCTTGGACTTTGGCTAGCTCAGTAGTACCCGTAAGGTGGGATGCTGCACATAAG  
GCAGCACCACCGGCAGCAGCAGGCTTTGTGCAATTGATGATGGGTCTAAAACCAATGGCTGATGTCGCTATTTTG  
GATGTTACGGTTCTTCTAGGTTAATTGGAAGTGTGAAAGATGCTTTTAGACGTCGTGGTAAATCCCCTTGTACA  
ACTTTTGAAGCAGTGGCAGCAGTACTCTGGCGTTGTAGGACGAGGGCTATTCTTTCTGGTAGTTTCATCCGACAGT  
TCAGAGATCAATCCAGTAGTCGCATTATACTTTACAGTTAATGCAAGGAACTATGCAGGTGCTCGCAAGGTTAT  
TATGGAAATTGTGTTACAGGAAGATTTGTTGTTGCAACAGGTGGCACTGTCGCAATGGGGATTTAGTTGATGTA  
GTTGAAATGATTCGTCGAGCAAAAAGAACAATTCCTGAACAATTTAAAGAGGGTGTGGTATAGGTAATGGTAAT  
GATGGTGTGAGACAACAACAAGTGAACGTGGATGGACTTGTGGGATATACTTATTCATTGTCACCTGTTGGAGA  
AATCTAGGTGTGGATGAAGCAGACTTTGGTGGTGGCAGACCAGCTAGAGTTACATCTCATACAAGACAAGAAGTT  
ACTGCACCTGCTTGTGTCGCTTGTCCACCTTTTCGCGGTAATGATGGAGCTAATGTACTCTCTGGTTGTGTTCCG  
AAAGAACATGCTGATGCCTTCTTAGCTGAGCTCGCTCTTCTAGTAGAACCCTGGCCCTTTTGGACTCATGA

## **SI Materials and Methods.** Sampling and preparation of wheat tissues for RT-PCR analysis

Bread wheat cv. ‘Chinese Spring’ plants grown in hydroponic cultures were used for collection of coleoptile, root and root tip (5 mm terminal sections) tissues. Sterilized seeds were transferred to sterile polyacrylamide beads (Scotts) equilibrated with Hoagland’s medium #2. Tissues were harvested after 5 days of incubation under controlled conditions (16 h/ 8 h light/dark photoperiod, 23°C). Tissues of stem, inflorescence and leaf infected with mildew (*Blumeria graminis f. sp. tritici* isolate FAL92315) were harvested from 9-week-old plants grown in a greenhouse. Leaf and wounded leaf tissues were harvested from 12-day-old plants grown in a controlled environment (16 h/ 8 h light/dark photoperiod, 18°C during daytime, 13°C at night). Wounded leaf tissue was collected 3 h after wounding with forceps. For root tips infected with *Gaeumannomyces graminis* (Take-all), tissues were collected from sterile plants germinated on a fungus-containing substrate. 5 mm terminal root sections were collected 6 d after sowing. For preparation of substrate, fungus was grown in 200 ml PD medium at 22°C/130 rpm for 4 d, mycelium washed 5 times with Hoaglands medium #2 and mixed with 20 ml polyacrylate beads (prepared by addition of 5 gr of cross-linked polyacrylate (Miracle-Gro) to 250 ml of Hoagland’s medium #2, equilibration of hydrated beads with 3 x 250 ml of medium and subsequent autoclaving).

## **SI Materials and Methods.** Quantitative real-time PCR (qRT-PCR) of wheat

RNA was extracted using TRI reagent (Sigma-Aldrich), according to manufacturer’s protocol. Following DNase treatment (RQ1, Promega), RNA was reverse-transcribed with M-MLV reverse-transcriptase (ThermoFisher Scientific) using a 1:1 mix of random hexamers and oligo(dT) primers. All oligonucleotides (SI appendix, Table S10) were designed using Primer3 software (1), with at least one homoeolog-specific oligo per each pair used. qRT-PCR was performed on a CFX96 Touch Real-Time PCR instrument (Bio-Rad) in the following conditions: initial step in the thermal cycler for 3 min at 95°C, followed by PCR amplification for 40 cycles of 10 s at 95°C and 30 s at 59°C, and finally dissociation analysis to confirm the specificity of PCR products with 0.5°C ramping from 55°C to 95°C. Each 10 µl reaction was comprised of 5 µl LightCycler 480 SYBR Green I Master mix (Roche Life Science), 2 µl cDNA template, 2 µl H<sub>2</sub>O and 1 µl primer mix (0.5 µM each primer). Relative transcript levels were calculated according to the Pfaffl method (2), using the housekeeping gene  $\beta$ -tubulin (TUBB) as reference (3).

## **SI Materials and Methods.** Quantitative real-time PCR (qRT-PCR) of *B. distachyon*

*B. distachyon* accession Bd3-1 seeds were soaked, peeled, and placed between three filter paper layers soaked in 5 ml water. The seeds were stratified for 5 days at 5°C in the dark and one day at 22°C (16h/8h - light/dark photoperiod) in a controlled environment growth cabinet. For Fusarium root rot (FRR) material, ten stratified seeds were placed on 9 cm<sup>2</sup> filter square paper on 50 ml 0.8% water agar. All plates were placed in a plant propagator with water-soaked paper towels, angled 20° from the upright position, and stored for 3 days at 22°C (16 h/ 8 h - light/dark photoperiod, variable humidity). *Fusarium graminearum* isolate PH1 was maintained on potato dextrose agar (PDA) at 22°C 16 h/ 8 h - light/dark photoperiod in a controlled environment growth cabinet. One 9 cm diameter Petri-dish of seven-day old *F. graminearum* mycelia was blended to a slurry with 1 ml water and applied to three points on each root (root tip, mid root, and near seed) using a 10 ml syringe. The inoculum slurry was removed once infection was visible at 1 dpi and the roots were rinsed with sterile distilled water. Immediately after and then every two days, ten roots per plate (one biological replicate pool) were cut and flash frozen in liquid nitrogen. For Fusarium Head Blight (FHB) material, seeds were sown in 50% peat/sand and 50% John Innes mix 2 (two seeds per 8 cm<sup>2</sup> pot). Plants were then maintained for six weeks at 22°C (20 h/ 4 h - light/dark photoperiod, 70% humidity) in controlled environment growth cabinet until mid-anthesis. Before the dark period, pots and matting was watered until run-off, spikes were inoculated with 1 x 10<sup>6</sup> spores/cm<sup>2</sup> amended with 0.05% Tween-20, and all plants were enclosed in clear plastic bags to maintain high humidity for three days. Immediately after and then every two days, three spikes from different plants were pooled and flash frozen in liquid nitrogen. For conidial suspension inoculum, Mung Bean (MB) broth (4) with a 1 cm<sup>2</sup> *F. graminearum* PDA mycelial plug was incubated at 23-25°C, 200 rpm for seven days. The inoculum was filtered with cheesecloth and quantified using a haemocytometer.

RNA from FHB, FRR, and control samples was extracted using a QIAGEN RNAeasy plant mini kit as per standard protocol. RNA was then immediately cleaned using Turbo DNA-free kits (Invitrogen) as per standard protocol except for two rounds of Turbo DNase treatment. Subsequently cDNA was prepared using SuperScript III Reverse Transcriptase (Thermo Fisher Scientific), as per standard protocol. All oligonucleotides (SI appendix, Table S10) were designed using Primer3 software (1). Reverse transcriptase qPCR was performed in a Framestar-480/384 well plate containing 5 µl of 2x SYBR Green JumpStart Taq ReadyMix (Sigma-Aldrich), 2 µl cDNA, 0.6 µl of 10 µM per primer, and 1.8 µl water per well. The thermocycling protocol 300 s 95°C, 45x(94°C 10 s, 58°C 10 s, 72°C 10 s, 75°C 2 s (single acquisition)), followed by dissociation analysis by ramping from 65°C to 97°C, was performed on a Roche LightCycler LC480. Cq values and primer efficiency were quantified using the LinRegPCR tool (5). Relative quantification was calculated according to the Pfaffl method (2), using the housekeeping gene GAPDH as reference.

## **SI Materials and Methods.** Generation of DNA constructs

For cloning of *Brachypodium distachyon* and wheat genes, RNA was extracted from mature plant leaves of *B. distachyon* (accession Bd21) or leaves from 10-day-old *Triticum aestivum* plants (Chinese Spring), infected with powdery mildew (*Blumeria graminis* f. sp. *tritici*), using RNeasy plant mini kit (Qiagen). RNA was treated with RQ1 DNase (Promega) and cDNA libraries prepared with Superscript IV or Superscript III reverse transcriptase kits (Thermo Fisher Scientific), using oligo(dT) primers, according to manufacturer's protocols. TaOMT3, TaOMT6, TaOMT8, TaCYP71C164\_5D, TaCYP71F53\_5D, BdOSC2, CYP51H13P/H13\_5A/14/H15/H16/H35/H37 were amplified from cDNA using Phusion DNA polymerase (Thermo Fisher Scientific) or Q5 DNA polymerase (New England Biolabs). TaOSC\_5D, TaHSD, AsOSC1, AsCYP51H73 were synthesized by General Biosystems, Durham, NC, USA. BdACT, BdMeTr, TaCHS1, chi-1D, TaCPS-D2, TaKSL-D1 and *Taxus canadensis* GGPPS were synthesized by Twist Bioscience, San Francisco, CA, USA. TaCPS-D2, TaKSL-D1 and TcGGPPS lack signal sequences, to allow for cytosolic localization in *N. benthamiana* expression (6). *A. tauschii* IAS coding sequence was derived from TaOSC\_5D sequence with site directed mutagenesis (7) to obtain a single mutation (I581S). Synthesized and cDNA-amplified genes from triterpene and diterpene BGCs were cloned into a pCAMBIA-based (8) plant expression vector with Goldenbraid cloning (9), using BsaI and BsmBI (New England Biolabs) and T4 DNA ligase enzymes (New England Biolabs). Gene expression in final vectors is driven by *Solanum lycopersicum* ubiquitin 10 promoter and terminator (10). Synthesized and cDNA-amplified genes from flavonoid cluster were cloned into a pDONR207 Gateway entry vector and subcloned into a pEAQ-HT-DEST1 plasmid (11) using BP and LR clonase enzyme mixes (Thermo Fisher Scientific), respectively.

## **SI Materials and Methods.** GC-MS metabolite extraction and analyses

### **Metabolite extraction from agroinfiltrated *N. benthamiana* leaves for GC-MS analyses**

Diterpenes: for analysis of TaCPS-D2 and TaKSL-D1 transient expression, 5 mg of *N. benthamiana* leaf samples were extracted in 850  $\mu$ l ethyl acetate for 1 h in room temperature, with agitation. Following removal of plant tissue by centrifugation, 750  $\mu$ l from each extract was evaporated and reconstituted in 75  $\mu$ l ethyl acetate. Triterpenes: for analysis of wheat BGC 3(5D) genes expression, 5 mg samples were extracted in 500  $\mu$ l ethyl acetate with 5  $\mu$ g/ml 5 $\alpha$ -cholestan-3 $\beta$ -ol. For analysis of *B. distachyon* brachynacin cluster genes expression, 5 mg samples were extracted in 500  $\mu$ l methanol with 5  $\mu$ g/ml 5 $\alpha$ -cholestan-3 $\beta$ -ol. For analysis of oat and *A. tauschii* OSC and CYP51 genes, 5 mg samples were extracted in 500  $\mu$ l ethyl acetate. For analysis of combined expression of wheat BGC 3(5D) genes and BdACT, 5 mg samples were extracted in 300  $\mu$ l ethyl acetate. For analysis of combined expression of *B. distachyon* brachynacin cluster genes and TaHSD, 5 mg samples were extracted in 500  $\mu$ l ethyl acetate with 5  $\mu$ g/ml 5 $\alpha$ -cholestan-3 $\beta$ -ol. All triterpene extractions from *N. benthamiana* leaves were done in room temperature for 1 hour, with agitation. For all triterpene extractions, following the removal of plant tissue by centrifugation, 200  $\mu$ l were evaporated and reconstituted in 70  $\mu$ l TMS+pyridine (Sigma-Aldrich). Samples were derivatized for 0.5 h in 70°C.

### **Metabolite extraction from MeJA-treated wheat and *B. distachyon* leaves for GC-MS analyses**

MeJA-treated wheat leaf sections were freeze-dried and ground. 25 mg from each sample were extracted in 800  $\mu$ l ethyl acetate containing 5  $\mu$ g/ml 5 $\alpha$ -cholestan-3 $\beta$ -ol, with agitation for 2 h in 40°C. Following removal of tissue by centrifugation and filtration with 0.22  $\mu$ l filter mini columns (Norgen), 700  $\mu$ l from each extract was evaporated and reconstituted in 70  $\mu$ l TMS with pyridine (Sigma-Aldrich). Samples were derivatized for 0.5 h in 70°C. MeJA-treated *B. distachyon* leaf sections were freeze-dried and ground. 25 mg from each ground sample were extracted in 1100  $\mu$ l methanol containing 2.5  $\mu$ g/ml 5 $\alpha$ -cholestan-3 $\beta$ -ol, with agitation for 2 h in 40°C. Following removal of tissue by centrifugation and filtration, 800  $\mu$ l from each extract was evaporated and reconstituted in 70  $\mu$ l TMS with pyridine (Sigma-Aldrich). Samples were derivatized for 0.5 h in 70°C.

### **GC-MS analysis of diterpenes and triterpenes from *N. benthamiana* and grasses leaf extracts**

GC-MS analysis was performed using an Agilent 7890B instrument with a Zebron ZB5-HT Inferno column (Phenomenex). For triterpenes analysis, a previously described method (12) was used: injections were performed in pulsed splitless mode (30 psi pulse pressure). Inlet temperature was set to 250°C. GC oven temperature was initially held at 170°C for 2 mins, subsequently ramped to 300°C at 20°C/min and held at 300°C for an additional 11.5 min (20 min total run time). The GC oven was coupled to an Agilent 5977B MS detector set to scan mode, from 60 to 800 mass units (solvent delay 8 min). For semi-quantification of brachynacin in *B. distachyon* leaves, Selected Ion Monitoring (SIM) mode was used, for detection of brachynacin (m/z 170.1, 340.2, 387.3, 400.3, 445.4, 475.4, 500.4 ions were monitored) and internal standard 5 $\alpha$ -cholestan-3 $\beta$ -ol (m/z 215.1, 355.4, 445.5, 460.5 ions were monitored), with 100 ms dwell time for each ion. Diterpenes analysis was based on a previously described method (6): injections were performed in splitless mode. Inlet temperature was set to 280°C. GC oven temperature was initially held at 130°C for 2 mins, subsequently ramped up to 250°C at 8°C/min, followed by ramping up to 310°C at 10°C/min and held at 310°C for an additional 5 min (28 min total run time). The MS detector was set to scan mode, from 50 to 550 mass units (solvent delay 4 min).

### **SI Materials and Methods. LC-MS analyses**

#### **Metabolite extraction from agroinfiltrated *N. benthamiana* leaves for LC-MS analyses**

For LC-MS analysis of recombinantly expressed wheat BGC 3(5D) genes (including combined expression with BdACT), 25 mg of each sample were extracted in 2 ml methanol in room temperature for 1 h, with agitation. Following removal of plant tissue by centrifugation, extracts were partitioned twice with 2 ml hexane and filtered with 0.22  $\mu$ l filter mini columns (Norgen). Extracts were evaporated and resuspended in 100  $\mu$ l methanol. For analysis of recombinantly expressed *B. distachyon* brachynacin cluster genes (including combined expression with TaHSD), 10 mg of each sample were extracted in 400  $\mu$ l 80% methanol in room temperature for 1 h, with agitation. Following removal of plant tissue by centrifugation, extracts were partitioned with 500  $\mu$ l hexane and filtered. Extracts were evaporated and resuspended in 100  $\mu$ l 80% methanol. For analysis of wheat flavonoid cluster genes,

250 mg freeze-dried and ground samples were extracted with 4 mL methanol at room temperature for 1 h. Extracts were fully evaporated, resuspended in 200  $\mu$ L methanol, and filtrated through a mini column (pore size 0.22  $\mu$ m, Geneflow). Filtered samples were transferred to glass autosampler vials and 20  $\mu$ L of each sample was analyzed by UHPLC-CAD-PDA-MS.

#### **LC-MS analyses of triterpenes from *N. benthamiana* leaf extracts**

Leaf extracts were analyzed by reverse phase HPLC on a Shimadzu LCMS-2020 single quadrupole mass spectrometer coupled with a Dionex Corona Veo RS charged aerosol detector (Thermo Scientific), using a Kinetex 2.6  $\mu$ m XB-C18 100  $\text{Å}$ , 50 x 2.1 mm LC Column (Phenomenex). MS data was collected using combined electrospray ionization (ESI) and atmospheric pressure chemical ionization (APCI) in positive mode. 10  $\mu$ L samples were injected using 12 min, 14.5 min or 30 min mobile phase gradient methods using solvent A- water with 0.1% formic acid and solvent B- methanol with 0.1% formic acid, as follows. 12 min method: 50% B hold from 0 to 0.75 min, 50% to 90% B from 0.75 to 8 min, 90% B hold from 8 to 10 min, 90% to 50% B from 10 to 10.5 min, 50% B hold from 10.5 to 12 min. Flow rate, 0.4 ml/min. MS scan, m/z 250 – 1900. Column oven temperature, 40°C. 14.5 min method: 70% to 95% B from 0 to 10 min, 95% B hold from 10 to 11 min, 95% to 70% B from 11 to 11.1 min, 70% B hold from 11.1 to 14.5 min. Flow rate, 0.5 ml/min. MS scan, m/z 200 – 1200. Column oven temperature, 30°C. 30 min method: 15% B hold from 0 to 0.15 min, 15% to 60% B from 0.15 to 26 min, 60% to 100% B from 26 to 26.5 min, 100% B hold from 26.5 to 28.5 min, 100% to 15% B from 28.5 to 29 min, 15% B hold from 29 to 30 min. Flow rate, 0.3 ml/min. MS scan, m/z 100 – 1500. Column oven temperature, 30°C.

#### **LC-MS analyses of flavonoids from *N. benthamiana* leaf extracts**

Leaf extracts were analyzed by reverse phase HPLC on a Shimadzu LCMS-2020 single quadrupole mass spectrometer coupled with a Dionex Corona Veo RS charged aerosol detector (Thermo Scientific) and a SPD-M20A HPLC Photodiode Array Detector (PDA; Shimadzu), using a Kinetex 2.6  $\mu$ m XB-C18 100  $\text{Å}$ , 50 x 2.1 mm LC Column (Phenomenex), kept at 30°C. Water containing 0.1% formic acid (FA) and acetonitrile containing 0.1% formic acid (FA) were used as mobile phases A and B, respectively, with a flow rate of 0.2 mL/min. A gradient elution program was applied as follows: 0-1.5 min linearly increased from 0% to 10% B, 1.5-26 min linearly increased from 10% to 60% B, 26-26.5 min linearly increased from 60% to 80% B, 26.5-28.5 min linearly increased from 80% to 100% B, 28.5-29 min linearly decreased from 100% to 10% B hold on for another 1 min for re-equilibration, giving a total run time 30 min. MS detection was performed in both positive and negative ESI range of m/z 50–1500 with the following settings: desolvation temperature was 250°C; drying gas flow, 15 L/min; detector voltage was 1.25 kV; and nebulizing gas flow, 1.5 L/min. PDA chromatograms were recorded in a 200–600 nm range using a deuterium (D2) and tungsten (W) light source.

High-resolution mass spectrometry analysis of the metabolites was carried out on a Q Exactive instrument (Thermo Scientific). Chromatography was performed using a Kinetex 2.6  $\mu$ m XB-C18 100  $\text{Å}$ , 50 mm x 2.1 mm (Phenomenex) column kept at 30°C. Water containing 0.1% formic acid (FA) and acetonitrile containing 0.1% formic acid (FA) were used as mobile phases A and B, respectively with a flow rate of 0.4 mL/min. A gradient elution program was applied as follows: 0-0.75 min linearly

increased from 0% to 10% B, 0.75-13 min linearly increased from 10% to 60% B, 13-13.25 min linearly increased from 60% to 80% B, 13.25-14.25 min linearly increased from 80% to 100% B, 14.25-14.5 min linearly decreased from 100% to 10% B hold on for another 2.5 min for re-equilibration, giving a total run time 17 min. MS detection was performed in both positive and negative ESI range of 100–1500 *m/z*. The analysis of the 3D field of the Photodiode-Array Detection (PDA) was recorded in a 200–600 nm range using a vanquish detector (Thermo Scientific).

**SI Materials and Methods.** Purification of compounds from large-scale *N. benthamiana* agroinfiltration

#### **Purification of 19-hydroxy-isoarborinol**

160 6-weeks old *N. benthamiana* plants were manually infiltrated with *Agrobacterium tumefaciens* strains containing pEAQ-HT-DEST1 vectors (11) expressing TaIAS and TaIAH. For infiltration, agrobacteria strains were mixed 1:1 in MMA buffer (10 mM MgCl<sub>2</sub>, 10 mM MES/KOH pH5.6, 150 μM acetosyringone) to a final concentration of O.D.<sub>600</sub> 0.2 per each strain. Infiltrated leaves were harvested 6 days post infiltration and lyophilized. 111 gr of powdered leaf material was extracted twice with 15 ml/gr ethanol, using a Buchi Speed extractor E916 (100°C, 100 bar). The extract was saponified by addition of 35 ml water and 15 gr KOH per 150 ml of extract, and incubation for 2 h at 65°C. Following addition of 50 ml water per 150 ml of extract, the saponification reaction was extracted three times with 100 ml hexane. Solvent was removed by rotary evaporation and residual was applied to a flash chromatography column (35mm diameter) filled with 100 ml of silica (LC60A35-70 μm). 19-hydroxy-isoarborinol was eluted from the column with 1:1 hexane:ethyl acetate. Fractions containing the product were pooled and evaporated. Decolorization with addition of a minimal amount of activated charcoal was followed by recrystallization in an ethanol-H<sub>2</sub>O mix, to give a final yield of 20 mg purified compound.

#### **Purification of ellarinacin**

100 *N. benthamiana* plants were infiltrated by vacuum (13) with *A. tumefaciens* GV3101 strains containing vectors for expression of TaIAS, TaIAH, TaHID, TaHIO and oat tHMGR. For infiltration, agrobacteria strains were mixed in MMA buffer to a final concentration of O.D.<sub>600</sub> 0.2 per each strain. Infiltrated leaves were harvested 8 days post infiltration and lyophilized. 129 gr of powdered leaf material was extracted with ethyl acetate using a Buchi Speed extractor E916, and chlorophylls were removed from the extracts by addition of ion-exchange resin, following the protocol detailed in<sup>2</sup>. Three successive rounds of fractionation were performed on an Isolera Prime flash chromatography system (Biotage), with hexane-ethyl acetate gradients specified in Table S11, to yield 10.3 mg of purified compound.

#### **Purification of brachynacin**

100 *N. benthamiana* plants were infiltrated by vacuum with *A. tumefaciens* GV3101 strains containing vectors for expression of BdIAS, BdIAH, BdHIH, BdTIH, BdACT and oat tHMGR. For infiltration, agrobacteria strains were mixed in MMA buffer to a final concentration of O.D.<sub>600</sub> 0.15 per each strain.



Infiltrated leaves were harvested 9 days post infiltration and lyophilized. 69 gr of powdered leaf material was extracted with methanol using a Buchi Speed extractor E916, following the protocol detailed in<sup>2</sup>. Two successive rounds of fractionation were performed on an Isolera Prime flash chromatography system (Biotage), with hexane-ethyl acetate gradients specified in Table S11. Product-containing fractions from flash chromatography were pooled and evaporated, and resulting product was dissolved in 1 ml 95% MeOH for semi-preparative HPLC purification on an Agilent 1290 Infinity (II) system. A Luna 5  $\mu\text{m}$  C18(2) 100 Å, 250 x 10 mm LC column (Phenomenex) was used, with column oven temperature set at 25°C. A mobile phase gradient was run at 3.5 ml/min with buffers A- 0.1% formic acid in H<sub>2</sub>O, and B- 0.1% formic acid in acetonitrile, as follows: 20-60% B from 0-25 min, 60-100% B from 25 to 25.5 min, 100% B from 25.5 to 28 min, 100-20% B from 28 to 28.5 min, 20% B from 28.5 to 30 min. 0.5 ml of sample was injected in five 100  $\mu\text{l}$  injections. Eluent was monitored by an Evaporative Light Scattering Detector (ELSD). Collected fractions containing brachynacin product were pooled and evaporated, to yield <2 mg of purified compound.

## **SI Materials and Methods.** Computational analyses

### **Regulatory network analysis**

Target gene-transcription factor interactions and GO term enrichment tables were extracted from a GENIE3-generated wheat regulatory network (14), available at <https://doi.org/10.5447/ipk/2018/7>. Network visualization was done with Cytoscape v3.8 (15). Genbank accessions for benzoxazinoid pathway genes were retrieved from (16) and matched with IWGSC gene IDs by BlastN on EnsemblPlants (<http://plants.ensembl.org>). WGCNA and GENIE3-generated regulatory network (14) were generated using IWGSC RefSeq v1.0 gene models. Other analyses described in this manuscript are based on RefSeq v1.1 gene models.

### **Co-expression analysis**

Co-expression within each cluster was assessed by calculation of the Pearson correlation coefficient ( $r$ -val) between the expression of a representative scaffold-forming gene from each cluster (*i.e.*, TPS in clusters 1(2A), 1(2D) and 2(2B), OSC in clusters 3(5A) and 3(5D), and chalcone synthase in cluster 4(5D)), and other genes in the cluster, within an RNA-seq dataset including 68 experiments from the wheat-expression.com website (14, 17).

### **Pairwise alignment with orthologous clusters in wheat ancestral species**

Peptide sequences were extracted from EnsemblPlants (<http://plants.ensembl.org>): *Aegilops tauschii* (Aet\_v4.0) (18), *Triticum turgidum subsp. dicoccoides* (WEWSeq\_v1.0) (19), *Triticum aestivum* (IWGSC) (20). Gene models were manually corrected to obtain full coding sequences, and putative protein sequences were aligned using LALIGN (<http://www.ebi.ac.uk>).

## Microsynteny analyses

To perform microsynteny analysis and generate figures, a python implementation of MCScan (21), [https://github.com/tanghaibao/jcvi/wiki/MCscan-\(Python-version\)](https://github.com/tanghaibao/jcvi/wiki/MCscan-(Python-version)), was used. FASTA and GFF3 files were retrieved from EnsemblPlants (<http://plants.ensembl.org>) for chromosomes 5A, 5B and 5D of *Triticum aestivum* (IWGSC), 5A and 5D of *Triticum turgidum subsp. diccocooides* (WEWSeq\_v.1.0) and 5D of *Aegilops tauschii* (Aet\_v4.0). MCScan ortholog finding and synteny assignment was run with a c-score of 0.99 and a single iteration. For wheat-rice analysis, wheat *Triticum aestivum*\_4.0 (22) and rice IRGSP-1.0 (23) assemblies were used.

## Genomic positioning of wheat BGC homologs in other grasses

Protein sequences of all co-expressed genes from wheat BGCs 1(2D), 2(2B), 3(5D) and 4(5D) were used as BlastP queries against the following genome assemblies: *Zea mays* B73 RefGen\_v4 (24), *Hordeum vulgare* cv. Morex r1 (25), *Brachypodium distachyon* Bd21 v3.1 (26), *Oryza sativa ssp. japonica* cv. Nipponbare v7.0 (27) and *Avena strigosa* S75 v2.0 (28). BlastP searches in all assemblies except *Avena strigosa* were performed in Phytozome13 (<https://phytozome-next.jgi.doe.gov/>) (29), using default parameters. Genomic locations of top BlastP hits in each species were visualized using Circos software v0.69-9 (30).

## SI Materials and Methods. Plant treatment with elicitors and pathogens

### Inoculation of detached wheat leaves with powdery mildew

For gene expression profiling by qRT-PCR, detached leaves from 10-day-old Chinese Spring wheat plants, grown in a growth cabinet (18°C, 16 h day-length under fluorescent lights supplemented with near-UV lights and 12°C for 8 h in the dark), were inoculated with *Blumeria graminis f. sp. tritici* (isolate FAL92315, maintained on the susceptible wheat cv. Cerco), or with *Blumeria graminis f. sp. hordei* (CH4.8 isolate, maintained on the susceptible barley cv. Golden Promise). Non-inoculated detached leaves kept in same conditions were used as controls. Leaf segments of ~4 cm length were placed in boxes containing water with 0.5% agar and 100 mg L<sup>-1</sup> benzimidazole, and were inoculated by blowing fresh spores into settling towers placed over the plant material, according to the method of (31). Following inoculation, plant material was kept in growth cabinet at constant temperature of 15°C and 16 h day-length, and samples collected 12 h and 24 h post-inoculation.

### Treatment of detached wheat leaves with elicitors

2-3 cm leaf sections were cut from 1<sup>st</sup> leaf of 10-day old Chinese Spring seedlings grown in soil. Leaf sections were kept in H<sub>2</sub>O in a Petri dish for 24 hours in a 22°C lighted growth cabinet (16 h/ 8 h light/dark photoperiod), then transferred to Parafilm-sealed Petri dishes containing different solutions and kept in one cabinet under the same conditions as pre-treatment: 150 μM methyl jasmonate (Sigma-Aldrich), 500 μM salicylic acid, pH 6.0 (Sigma-Aldrich), 0.5 mg/ml chitin oligosaccharides (NaCoSy, YSK, Japan) or H<sub>2</sub>O. All solutions also contained 0.02% Tween-20. Samples for qRT-PCR analysis

were collected after 2 h or 12 h. Four biological replicates of MeJa-treated leaves were collected after three days of treatment for GC-MS analyses.

### **Treatment of *B. distachyon* with methyl jasmonate**

Sections were cut from aerial parts of *B. distachyon* Bd21 plants grown in soil for 2.5 weeks. Samples were kept in H<sub>2</sub>O in a Petri dish for 24 h in a 22°C lighted growth cabinet (16 h photoperiod), then transferred to Parafilm-sealed Petri dishes containing 150 µM methyl jasmonate and 0.02% Tween-20, or 0.02% Tween-20 in H<sub>2</sub>O, and kept in one cabinet under the same conditions as pre-treatment. Four biological replicates of samples were collected for GC-MS analysis after three days.

## SI Figures

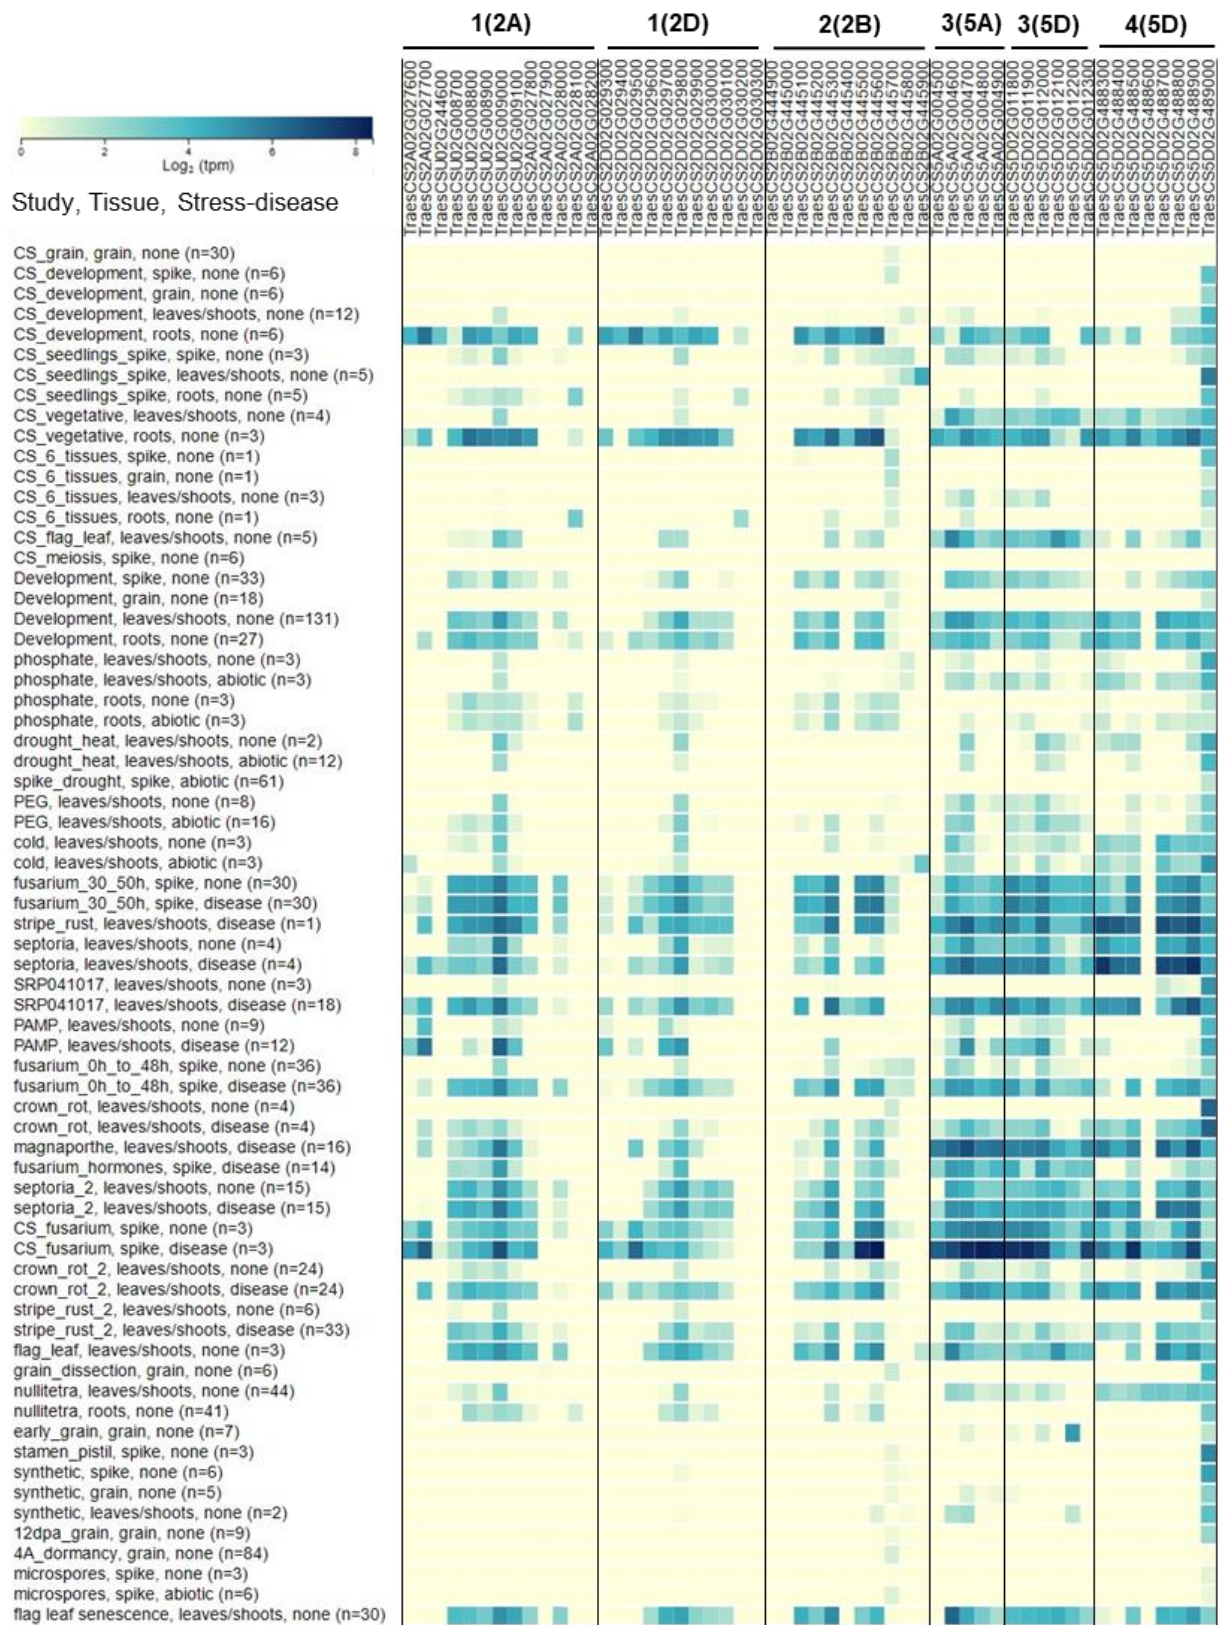

**Fig. S1. Gene expression data of six wheat biosynthetic gene clusters.** Log<sub>2</sub> of normalized values (transcripts per million) are shown, derived from RNA-seq data at <http://www.wheat-expression.com> (14, 17).

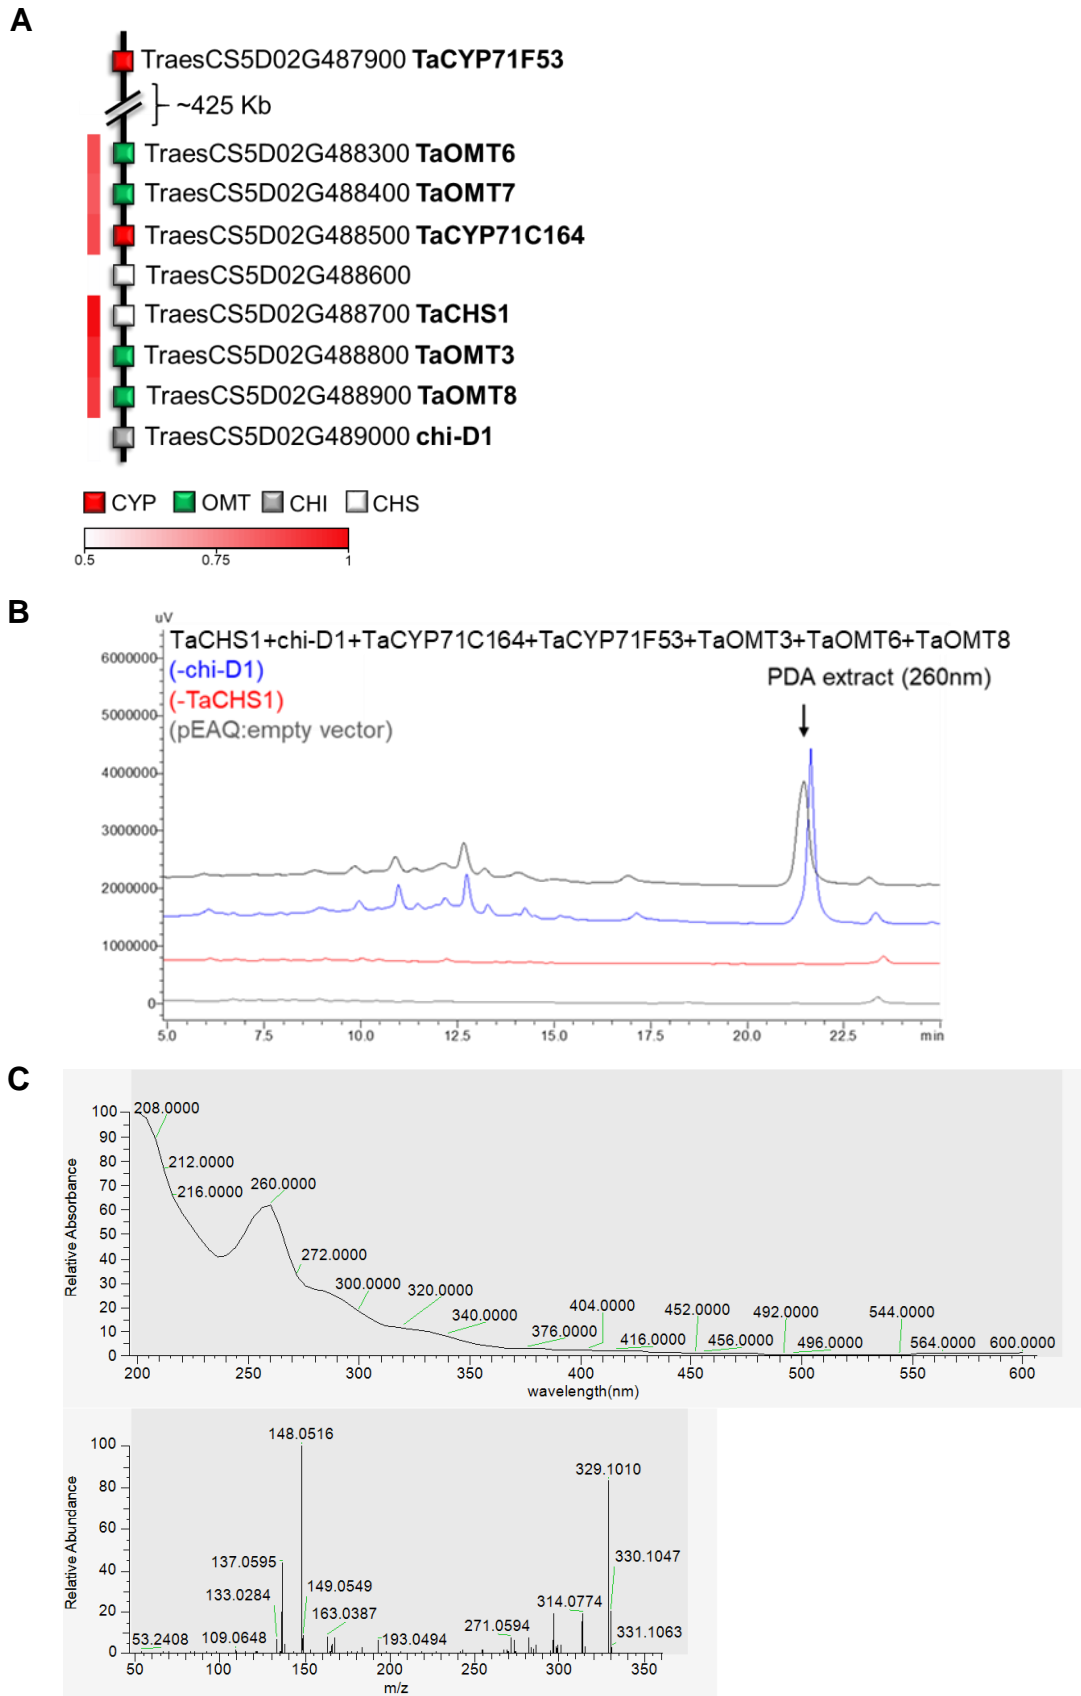

**Fig. S2. Wheat cluster 4(5D).** (A) Names and IWGSC IDs of wheat cluster 4(5D) genes. White to red color-coding denotes Pearson correlation ( $r$ ) values for expression of each gene with TaCHS1. (B) LC-PDA analysis of cluster 4(5D) genes expressed in *N. benthamiana*. The putative end-product of the pathway, marked with an arrow, is formed by expression of the complete cluster or with the absence of chi-D1, but not formed when TaCHS1 is not expressed. (C) UV-VIS and  $m/z$  spectra of the  $[M+H=329.1]$  ion produced by cluster 4(5D).

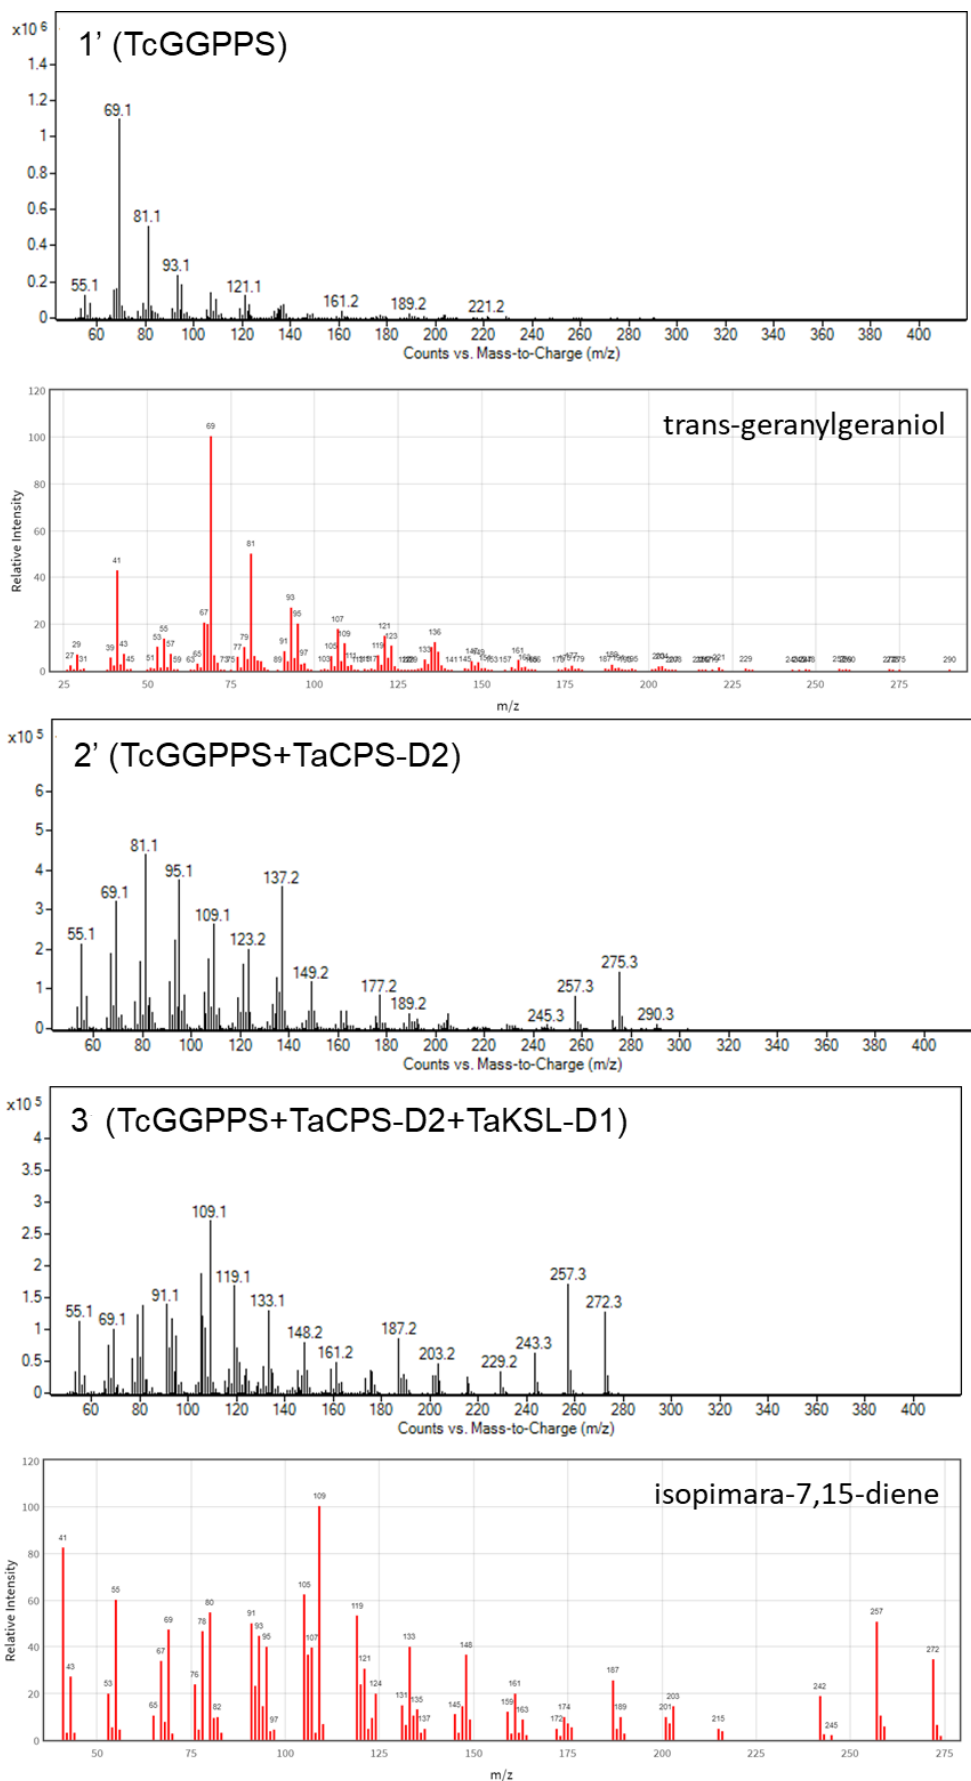

**Fig. S3. Mass spectra of wheat TaKSL-D1 and TaCPS-D2 products in *N. benthamiana* expression.** TaKSL-D1 and TaCPS-D2 were transiently expressed together with *Taxus canadensis* GGPP synthase and oat tHMGR. Mass spectra are shown at retention times of peaks putatively identified as geranylgeraniol (1'), copalol (2') and isopimara-7,15-diene (3), based on comparison to NIST Chemistry WebBook (1', 3) (<https://webbook.nist.gov/chemistry>) and literature (2') (32). tHMGR was included in all combinations of genes.

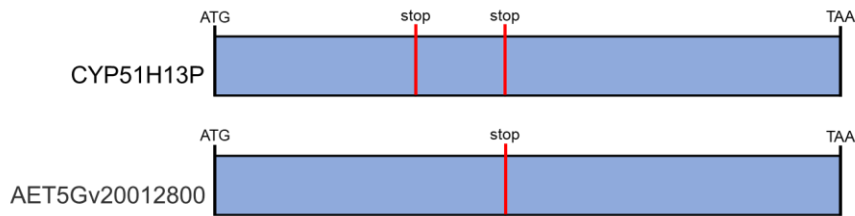

*T. aestivum* CYP51H13P coding sequence (manually corrected)

ATGGACTTGACAAGTCTCACTGCCATGTGGTGGGCCATAGCTCTTCTTTTATTACTGTATTGGCCACCAAGATCACAAGAGCAAGAATCACCAACATTGATCCACAGCG  
TACAACAGGCCAACCTCCACCCATGGTGAATGGACTTGCTCTCCTAGGATTATTACCTACCCTTCTGAAGAAGGGTCTACCACCTATGGTCAATTATCTATATGTTAACTAT  
GGCAGTGTCTTCACTGTAAGTTGCTTTGGAGTGATCAAGGTAACAACCTTTGATCGGGCCAGAGGCGACGACTCATTCTTCCAAGGTTTGGAGTCAGAGATTAGCCAT  
GGTAATCTGCTTGGAGTTCACAGTGCCCATGTTTGGCAAGGCAGTTGGTATGGTAGAGATACCGCCACCCGAATGGAACAAATGCGCTTCCACAGTGAAGCACTGAGG  
GCATCCAGGTTAAGGAGCCATGTTTCTCCAATGCTTCAAGAAGTGAGGATTCTTTGCAAAGTGGGGAGAGGAAGGCGTAGTTGATCTAAAGCTTGAAGTTCTAGCAG  
CTACTTATGTTGATATCAGGCCTGATGTTTGGTGGAAAAGAGGTCGGGGAGAATATGTTGATGAAGTCTACACACTTTTTCGCGAGATCGAAAAGGGTGTGACCTTGAT  
CAGCTTCTTGTCCCATATCTCCCAACTCCAGCAAAGTGGCAGCGTGATAGGGCGCGTATAAGGCTAACAGAGATCCTCTCTAATGTTGTCGAATCCCGTAAGAGCTCC  
GGGCGAGTGGAGGAGGACACGCTGCAGAAACTGATTGACTCCAAGTACAAGATGGTGCCTTACAACAGTAGAAGAGGTAGTCGGGTTGATCATTGGCTTGTGTT  
TGCTGGAAAACACACCCAGCTCTCATACTAGTACTTGGACTGGAGCTTGTCTCTCAGCCATCCAGCCTTCTTAAGAGCTGCCATTGAGGAGCAACATCAAGTCGCCAAG  
AAATACAAGGACGGACTAGAATAACAATGCCCTCTTAGAGATGGATACGCTGCATAATTGCATCAAGGAGGCGCTGCGGAAGAACCCTGCGACACCACTGCTGGTTCCG  
AGGGTCCATAAGCGCTTACAGGTGCAGACGAAAGAAGGCCAACAAATGACATCCAGCAGGACTACATCTAGCAACTCTACTATAGTAAACAACAATATCCCTTACAT  
TTATACGGACCCTCAGGTGTATGATCCAATCGGTTTGGCCCCGAAAGAAGAGAGACAAAGTGGGTGGCAAGTTCTTTACACATCATTGGTGGTGGAAAGGCACGT  
TTGCACCGGAGAGGCTTATGCTTACATGCAACTCAAAGTGATATGGAGCCATTTGCTGAGGAACTTTGATCTCGAATTGGTCTCTCCCTCCCTAACACAGACTGGAGC  
AAGTCTTGGCCAGATCCACAGGAAAATTAATCGTGAGATATACGAGAAATGGAATTTAA

*A. tauschii* AET5Gv20012800 coding sequence (manually corrected)

ATGGACTTGACAAGTCTCACTGCCATGTGGTGGGCCATAGCTCTTCTTTTATTACTGTATTGGCCACCAAGATCACAAGAGCAAGAATCACCAACATTGATCCACAGCG  
TACAACAGGCCAACCTCCACCCATGGTGAATGGACTTGCTCTCCTAGGATTATTACCTACCCTTCTGAAGAAGGGTCTACCACCTATGGTCAATTATCTATATGTTAACTAT  
GGCAGTGTCTTCACTGTAAGTTGCTTTGGAGTGATCAAGGTAACAACCTTTGATCGGGCCAGAGGCGACGACTCATTCTTCCAAGGTTTGGAGTCAGAGATTAGCCAT  
GGTAATCTGCTTGGAGTTCACAGTGCCCATGTTTGGCAAGGCAGTTGGTATGGTAGAGATACCGCCACCCGAATGGAACAAATGCGCTTCCACAGTGAAGCACTGAGG  
GCATCCAGGTTAAGGAGCCATGTTTCTCCAATGCTTCAAGAAGTGAGGATTCTTTGCAAAGTGGGGAGAGGAAGGCGTAGTTGATCTAAAGCTTGAAGTTCTAGCAG  
CTACTTATGTTGATATCAGGCCTGATGTTTGGTGGAAAAGAGGTCGGGGAGAATATGTTGATGAAGTCTACACACTTTTTCGCGAGATCGAAAAGGGTGTGACCTTGAT  
CAGCTTCTTGTCCCATATCTCCCAACTCCAGCAAAGTGGCAGCGTGATAGGGCGCGTATAAGGCTAACAGAGATCCTCTCTAATGTTGTCGAATCCCGTAAGAGCTCC  
GGGCGAGTGGAGGAGGACACGCTGCAGAAACTGATTGACTCCAAGTACAAGATGGTGCCTTACAACAGTAGAAGAGGTAGTCGGGTTGATCATTGGCTTGTGTT  
TGCTGGAAAACACACCCAGCTCTCATACTAGTACTTGGACTGGAGCTGCTCTCTCAGCCATCCAGCCTTCTTAAGAGCTGCCATTGAGGAGCAACATCAAGTCGCCA  
GAAATACAAGGACGGACTAGAATAACAATGCCCTCTTAGAGATGGATACGCTGCATAATTGCATCAAGGAGGCGCTGCGGAAGAACCCTGCGACACCACTGCTGGTTCCG  
CAGGGTCCATAAGCGCTTACAGGTGCAGACGAAAGAAGGCCAACAAATGACATCCAGCAGGACTACATCTAGCAACTCTACTATAGTAAACAACAATATCCCTTACG  
TTTATACGGACCCTCAGGTGTATGATCCAATCGGTTTGGCCCCGAAAGAAGAGAGACAAAGTGGGTGGCAAGTTCTTTACACATCATTGGTGGTGGAAAGGCACG  
TTTGCACCGGAGAGGCTTATGCTTACATGCAACTCAAAGTGATATGGAGCCATTTGCTGAGGAACTTTGATCTCGAATTGGTCTCTCCCTCCCTAACACAGACTGGAG  
CAAGTCTTGGCCAGATCCACAGGAAAATTAATCGTGAGATATACGAGAAATGGAATTTAA

**Fig. S4. Coding sequences of *T. aestivum* *TaCYP51H13P* and its *A. tauschii* ortholog, *AET5Gv20012800*.** Early stop codons are marked in red. *TaCYP51H13P* is the product of two IWGSC annotated genes, *TraesCS5D01G012100* and *TraesCS5D01G012200*. Manual annotation of these genes showed that they represent a single transcript with two premature stop codons and were therefore designated as a single pseudogene. The manual annotation was verified by cloning and sequencing of the full transcript from a cDNA library.

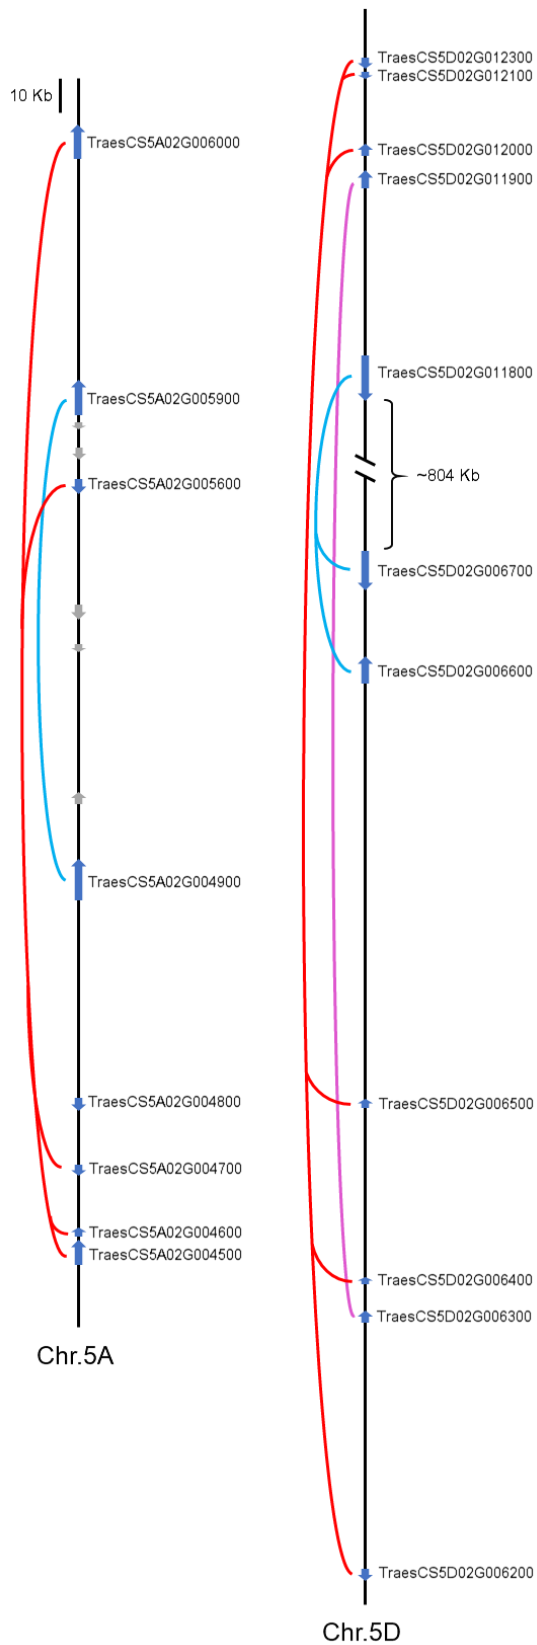

**Fig. S5. Paralogs of the 3-5A and 3-5D cluster genes on wheat chromosomes 5A and 5D.** Blue lines connect paralog OSC genes, red lines CYP51 genes, and pink line HSD genes.



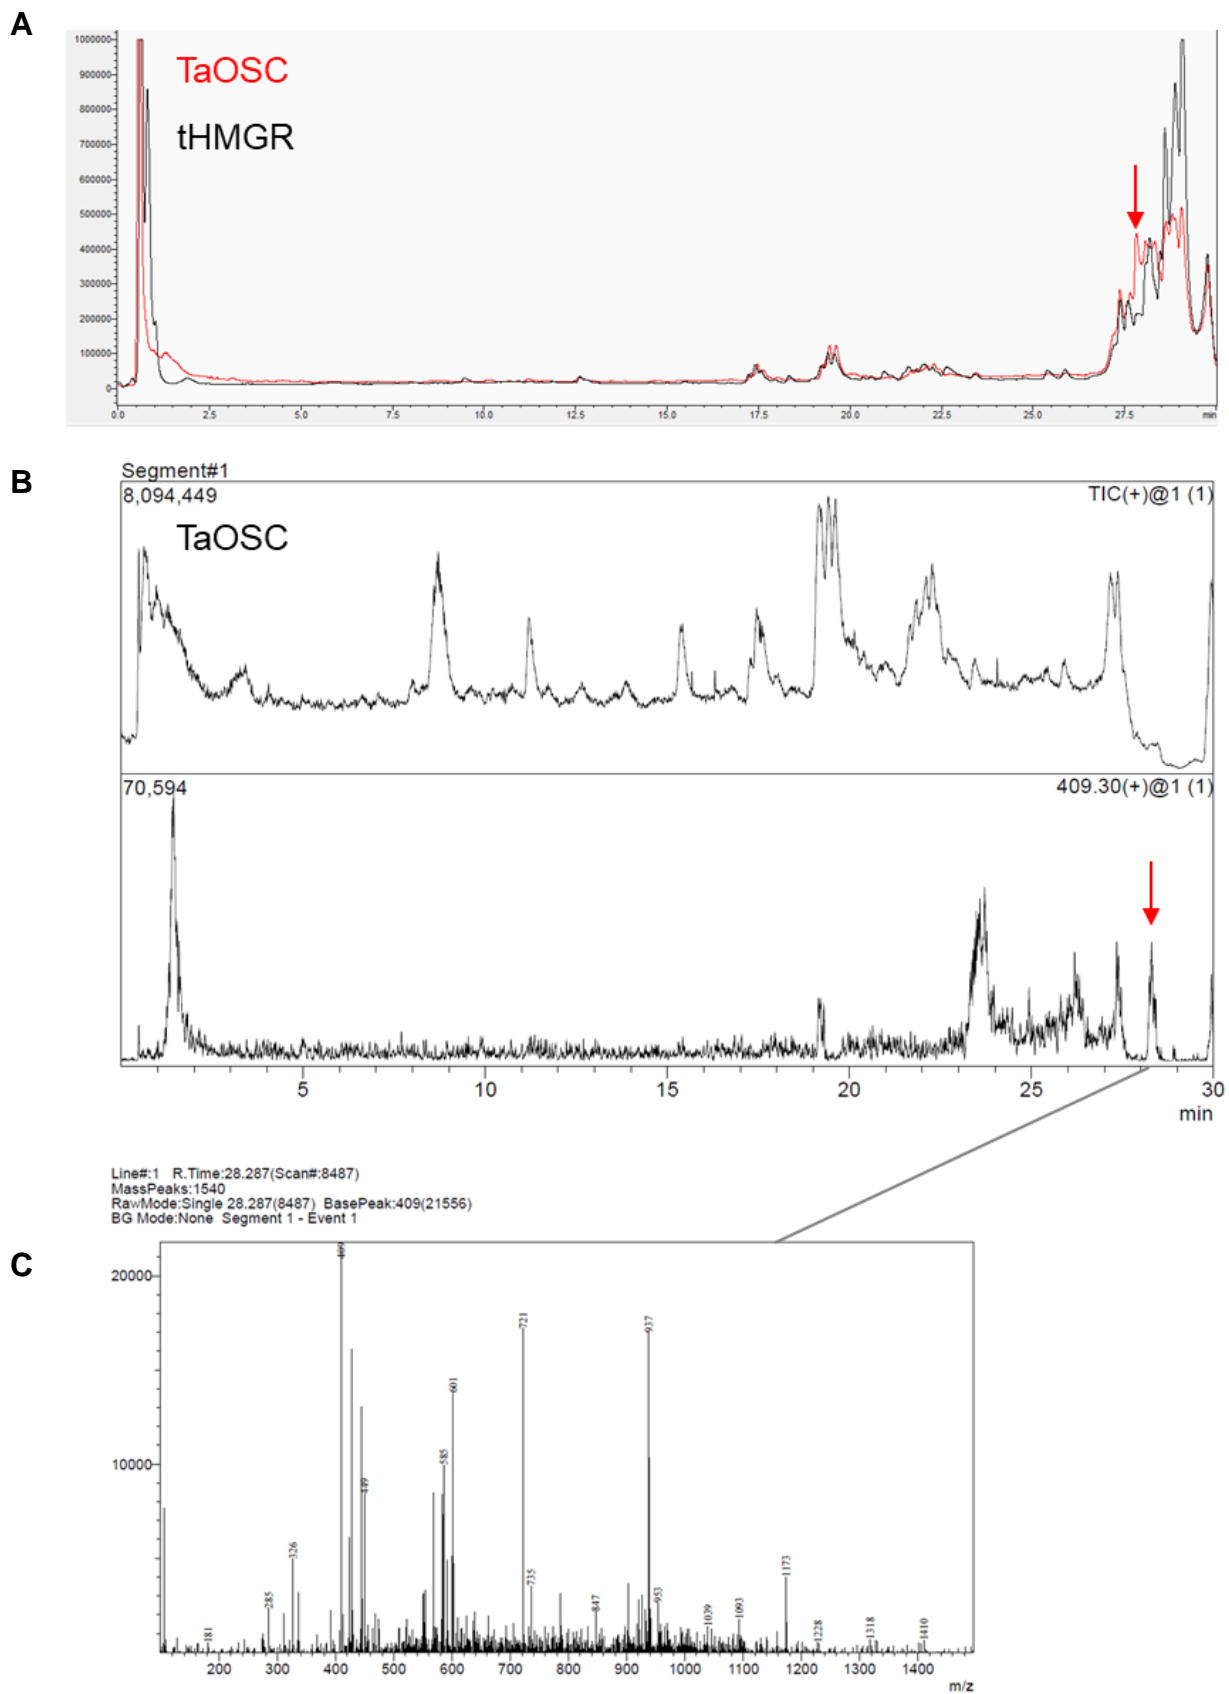

**Fig. S6. LC-MS detection of isoarborinol molecular ion.** (A) CAD chromatogram. (B) MS chromatogram- TIC and EIC of 409.3. (C) Mass spectra at peak retention time.

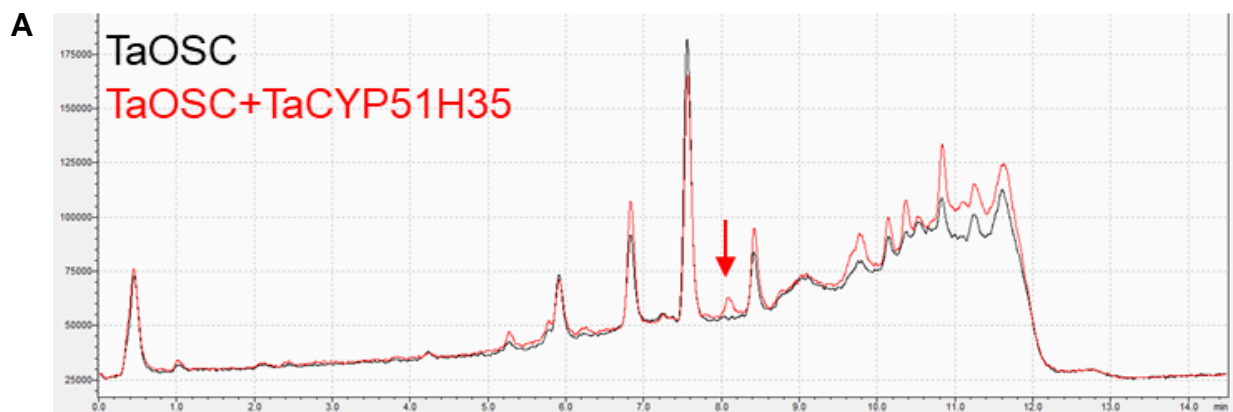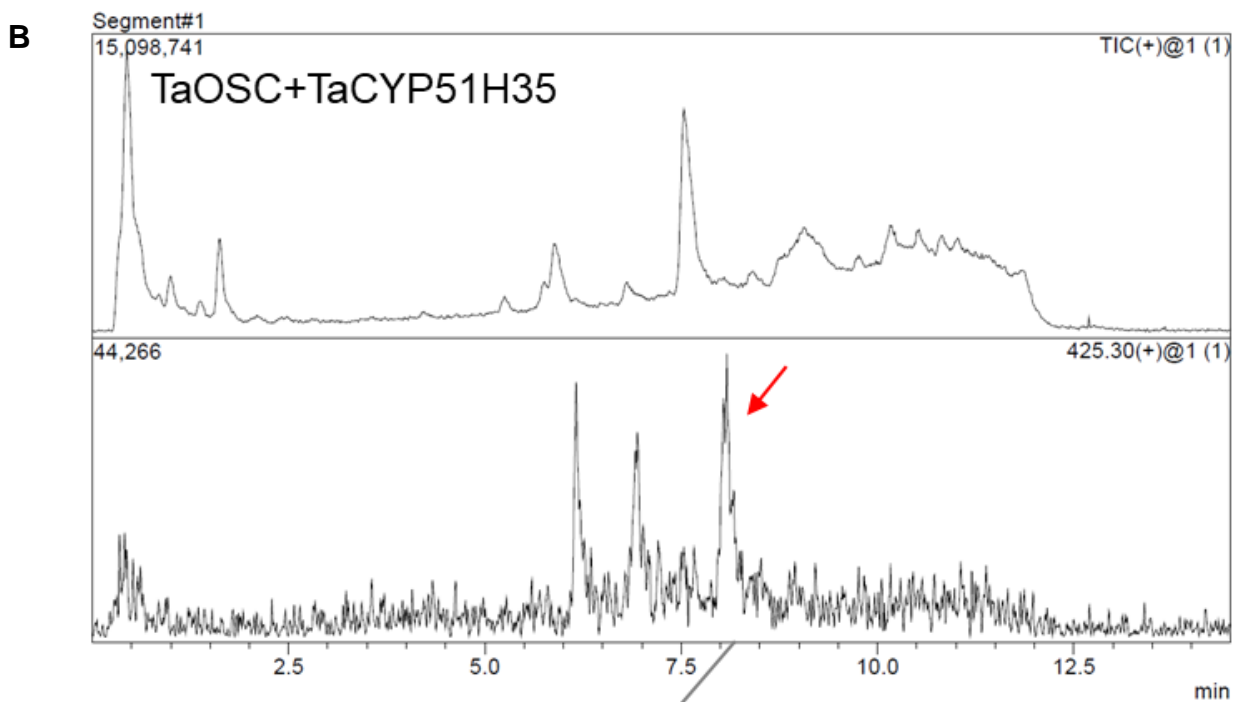

Line#:1 R.Time:8.093(Scan#:2429)  
MassPeaks:1010  
RawMode:Single 8.093(2429) BasePeak:413(120891)  
BG Mode:None Segment 1 - Event 1

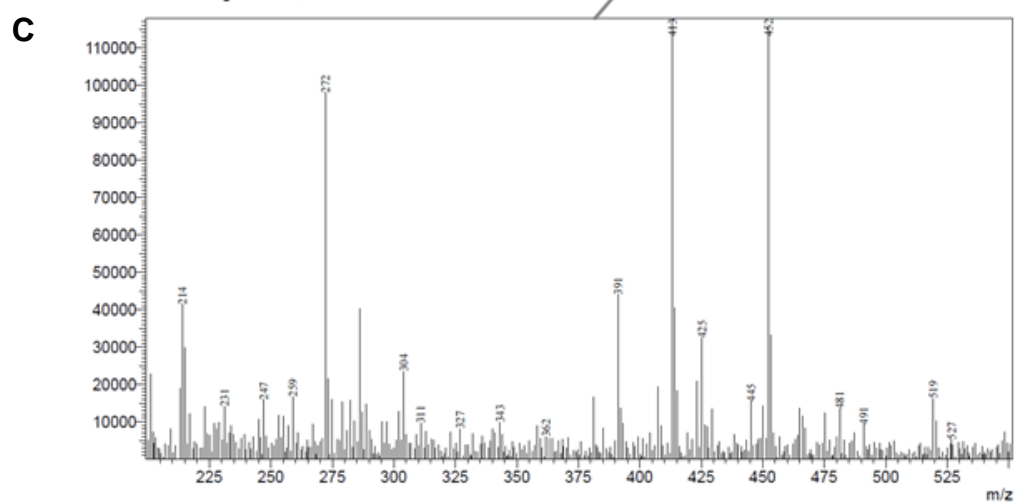

**Fig. S7. LC-MS detection of 19-hydroxy-isoarborinol molecular ion.** (A) CAD chromatogram. (B) MS chromatogram- TIC and EIC of 441.3. (C) Mass spectra at peak retention time.

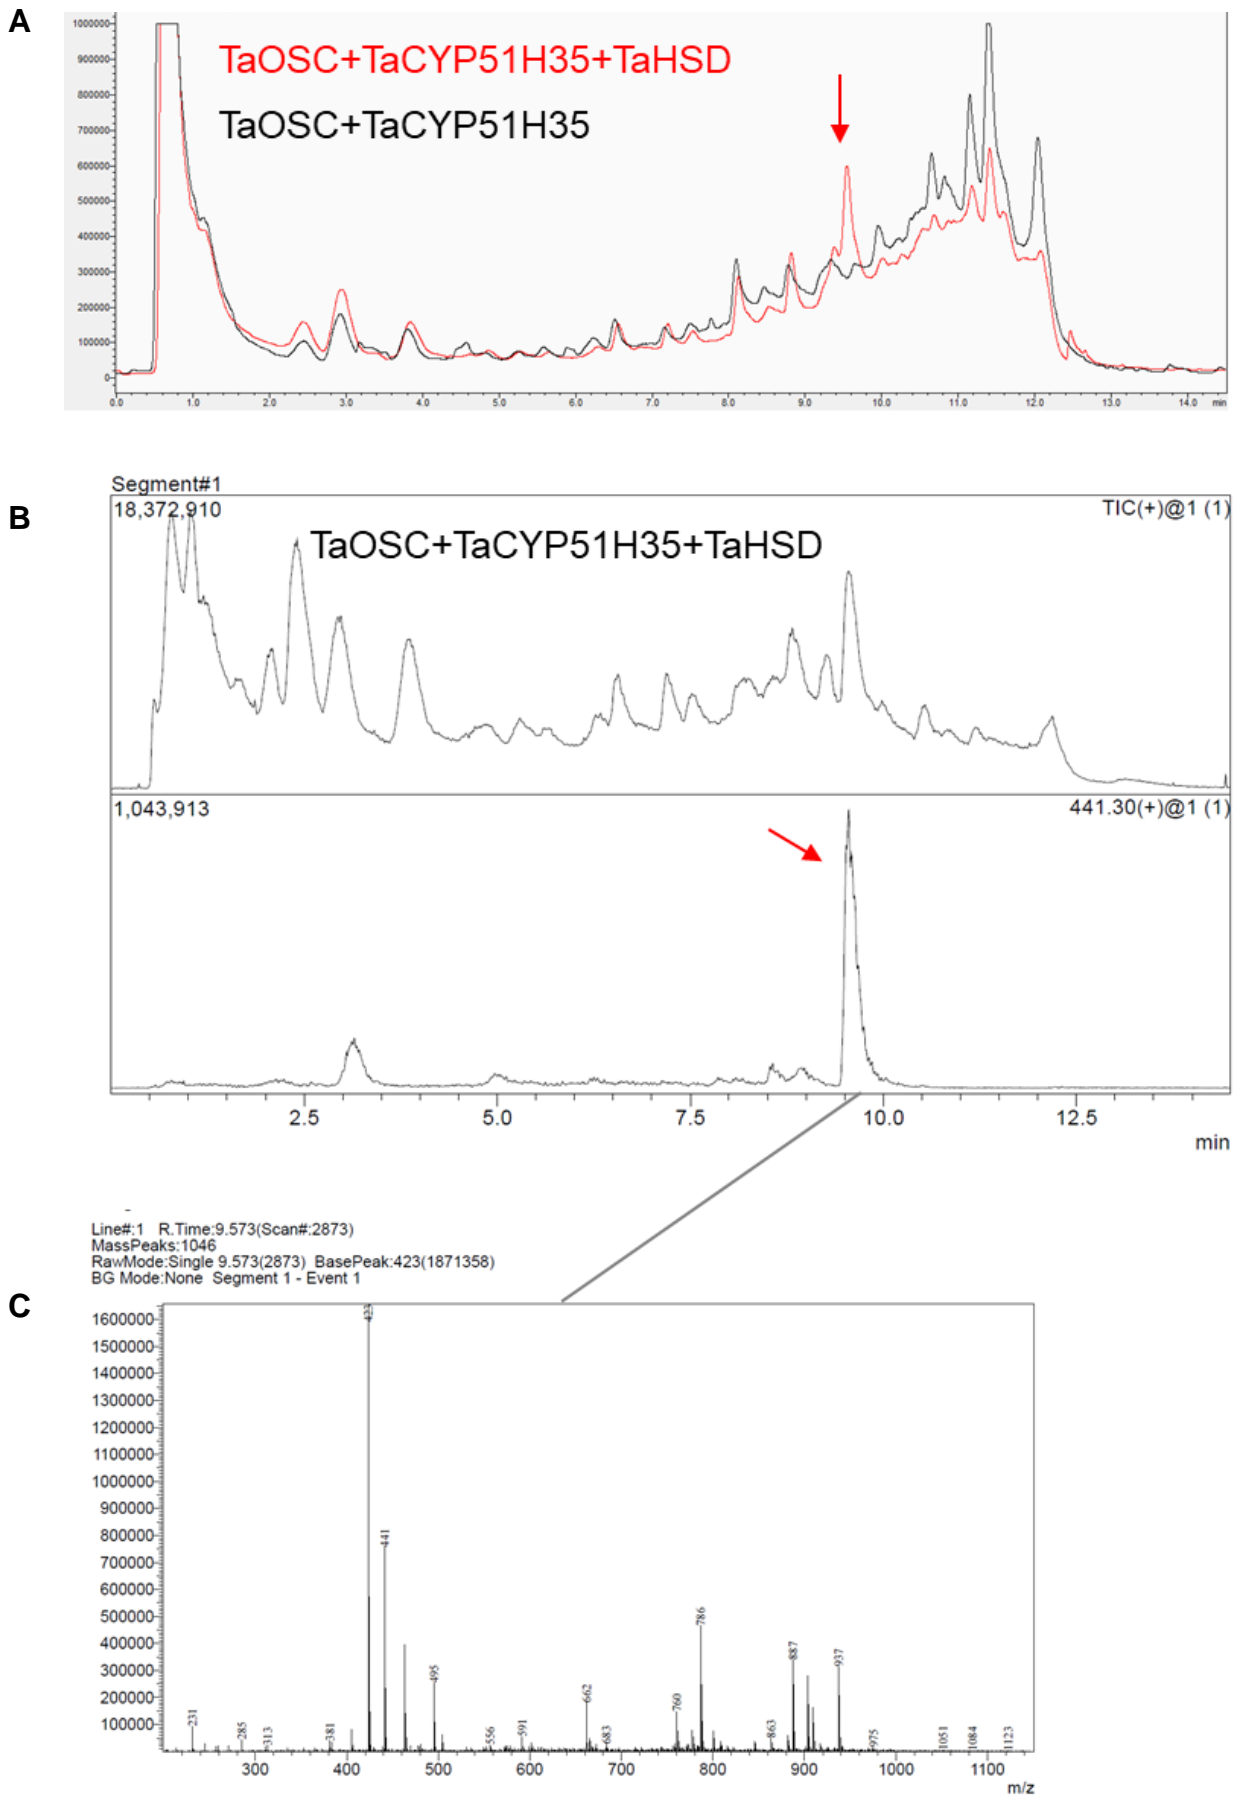

**Fig. S8. LC-MS detection of 19-hydroxy-isoarborinone molecular ion.** (A) CAD chromatogram. (B) MS chromatogram- TIC and EIC of 441.3. (C) Mass spectra at peak retention time.

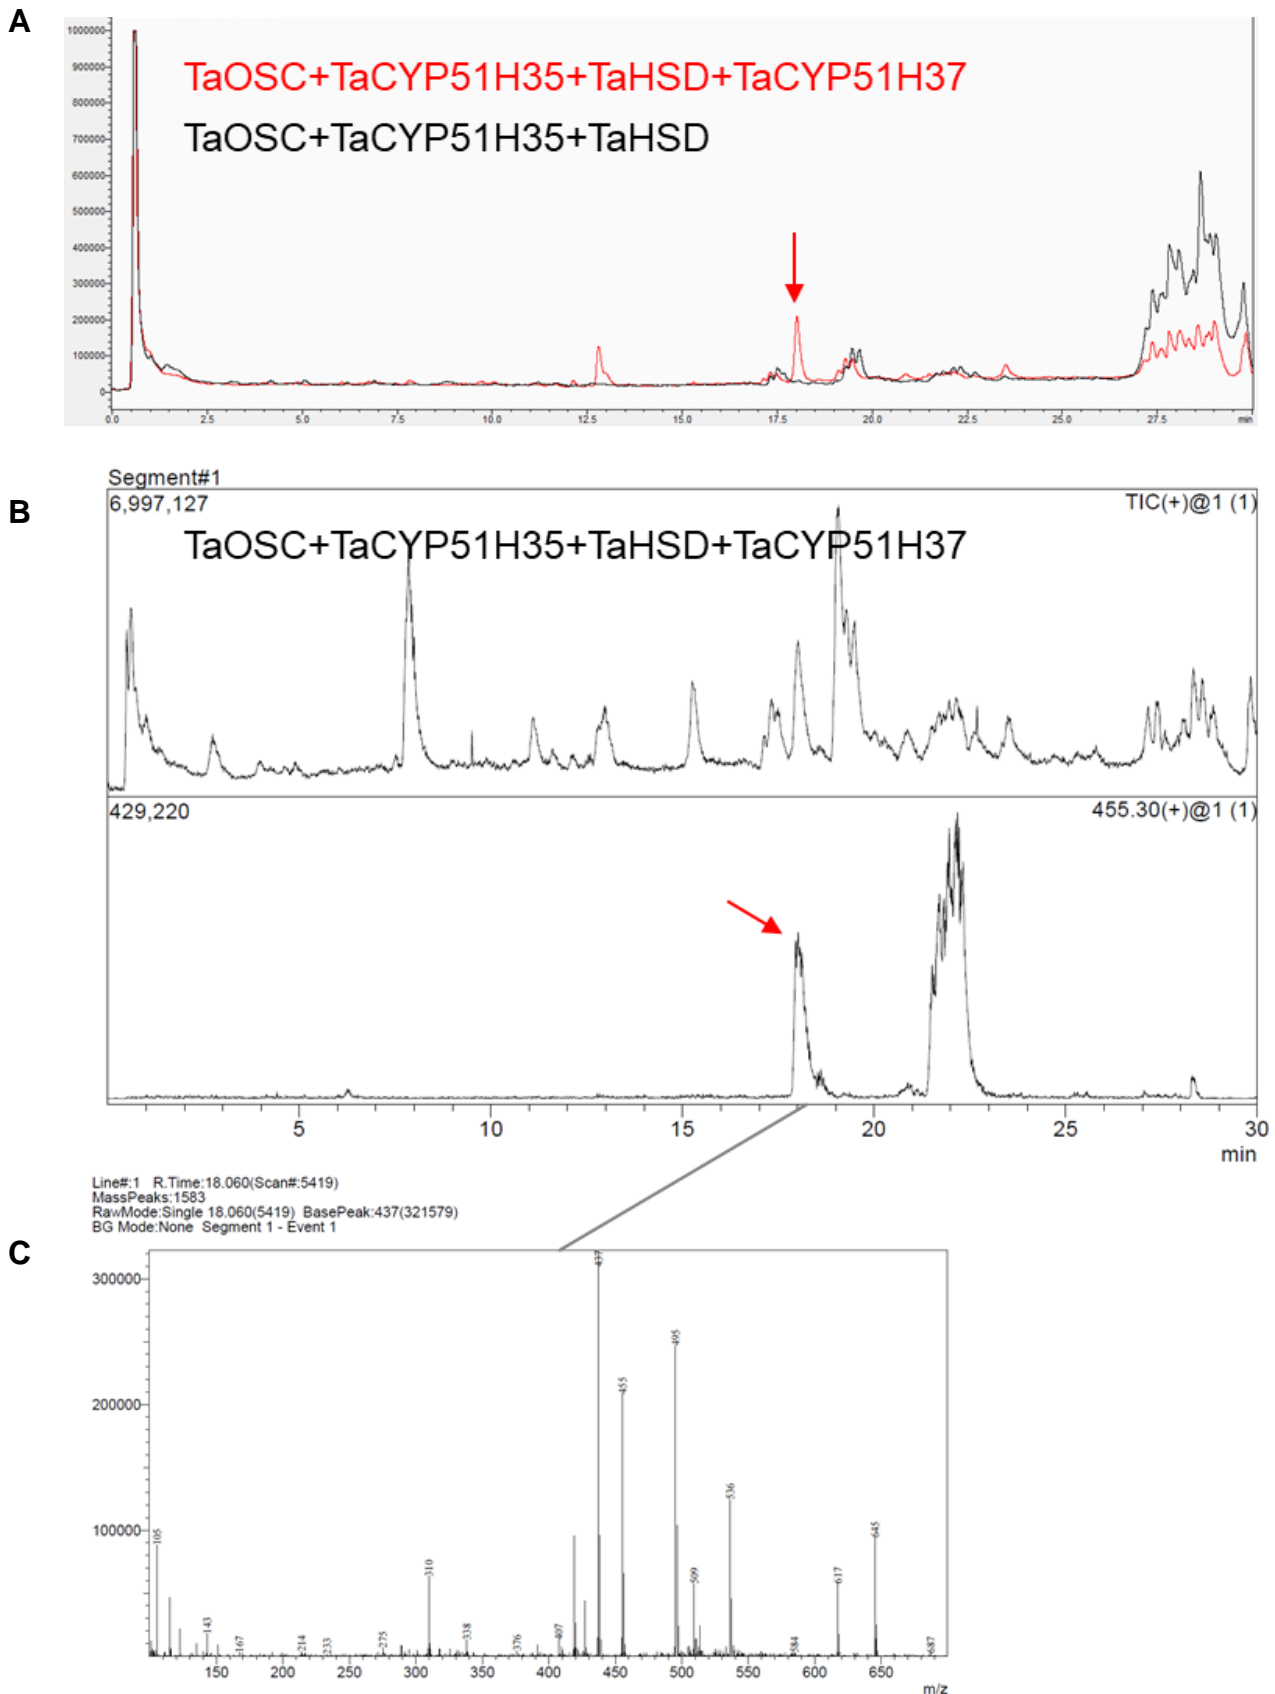

**Fig. S9. LC-MS detection of ellarinacin molecular ion.** (A) CAD chromatogram. (B) MS chromatogram- TIC and EIC of 455.3. (C) Mass spectra at peak retention time.

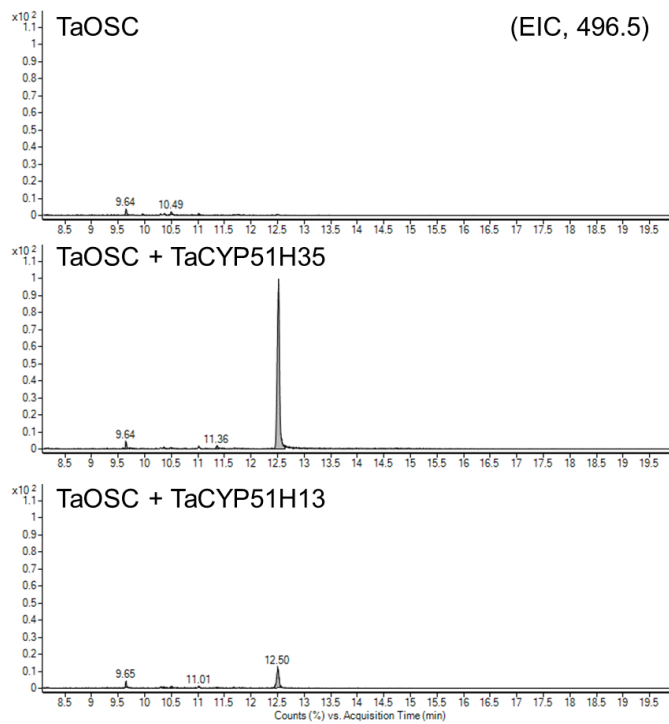

**Fig. S10. GC-MS analysis of wheat TaCYP51H35 and TaCYP51H13 expression in *N. benthamiana*.** EIC, extracted ion chromatogram of fragment ion representing 19-hydroxy-isoarborinol (496.5). Y-axes are linked. Oat tHMGR was included in all combinations of genes.

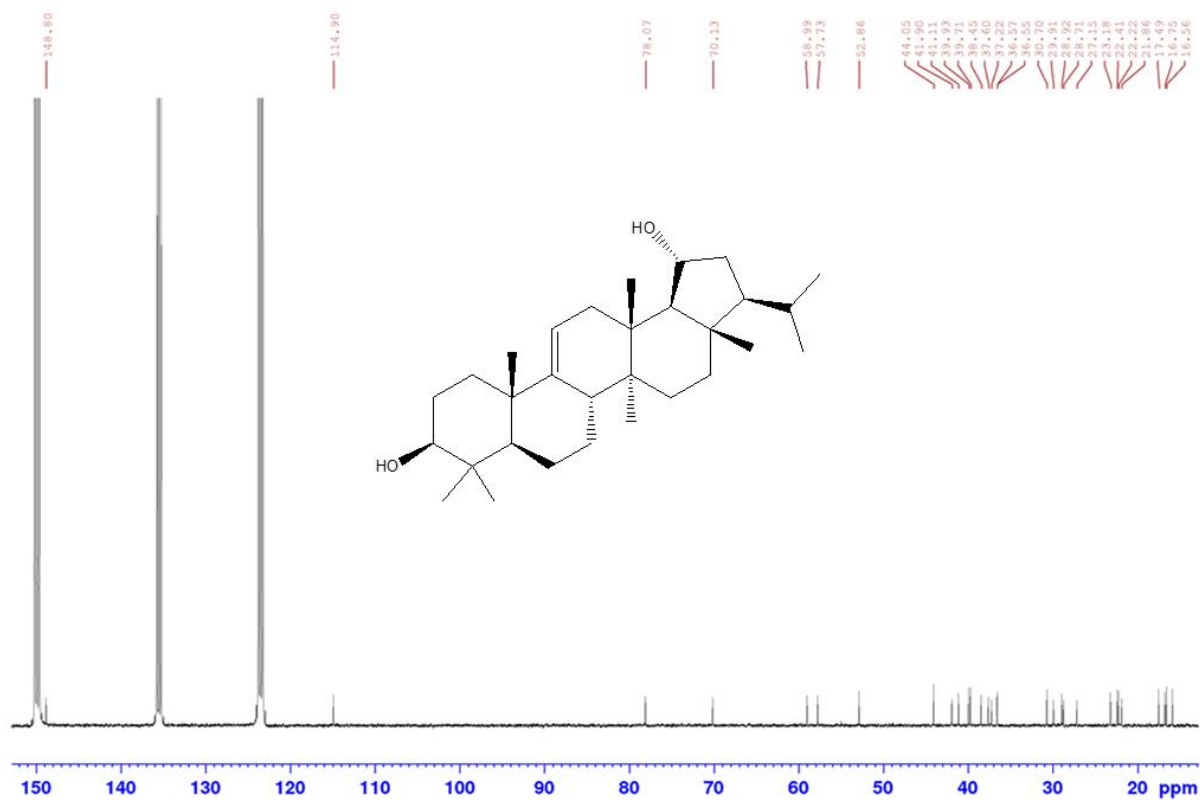

**Fig. S11.**  $^{13}\text{C}$  19-hydroxy-isobarborinol (Pyridine- $\text{d}_5$ ). Referenced to the most downfield peak reported in the literature (33). 400 MHz instrument.

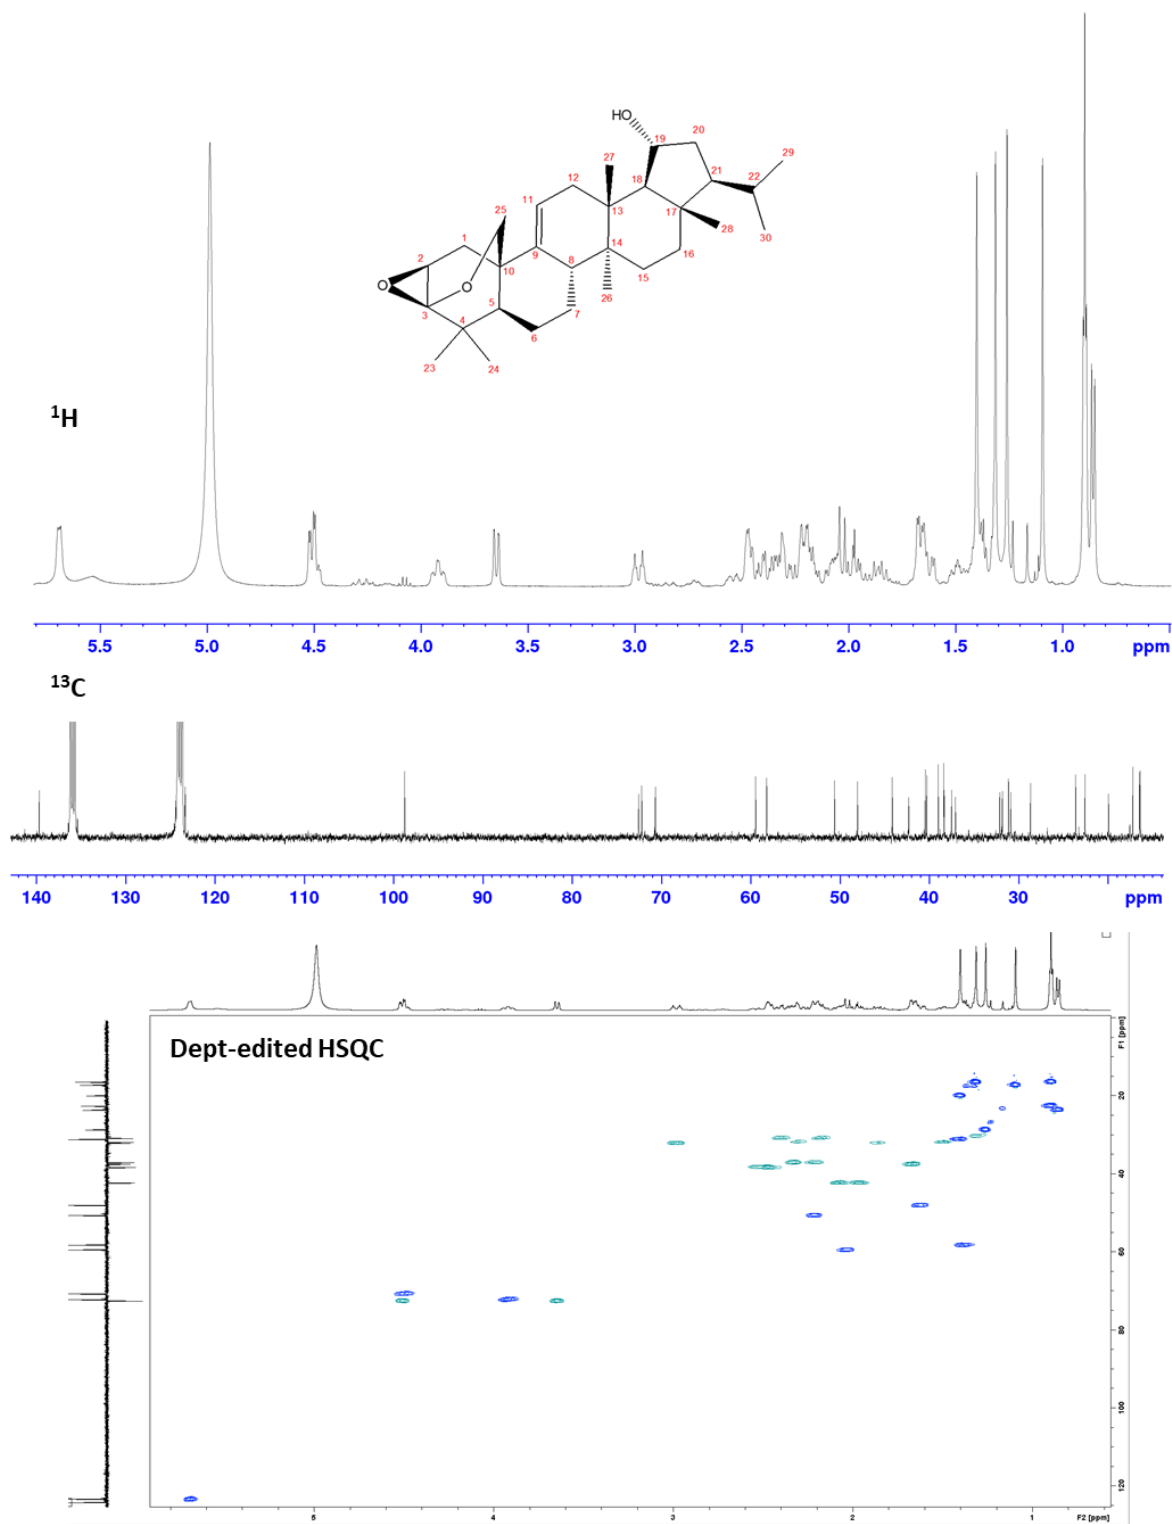

**Fig. S12.**  $^1\text{H}$ ,  $^{13}\text{C}$ , and dept-edited HSQC spectra for ellarinacin, (pyridine- $d_5$ ). Referenced to residual solvent peak ( $^1\text{H}$   $\delta$ : 8.74) ( $^{13}\text{C}$   $\delta$ : 150.3)]. 400 MHz instrument.

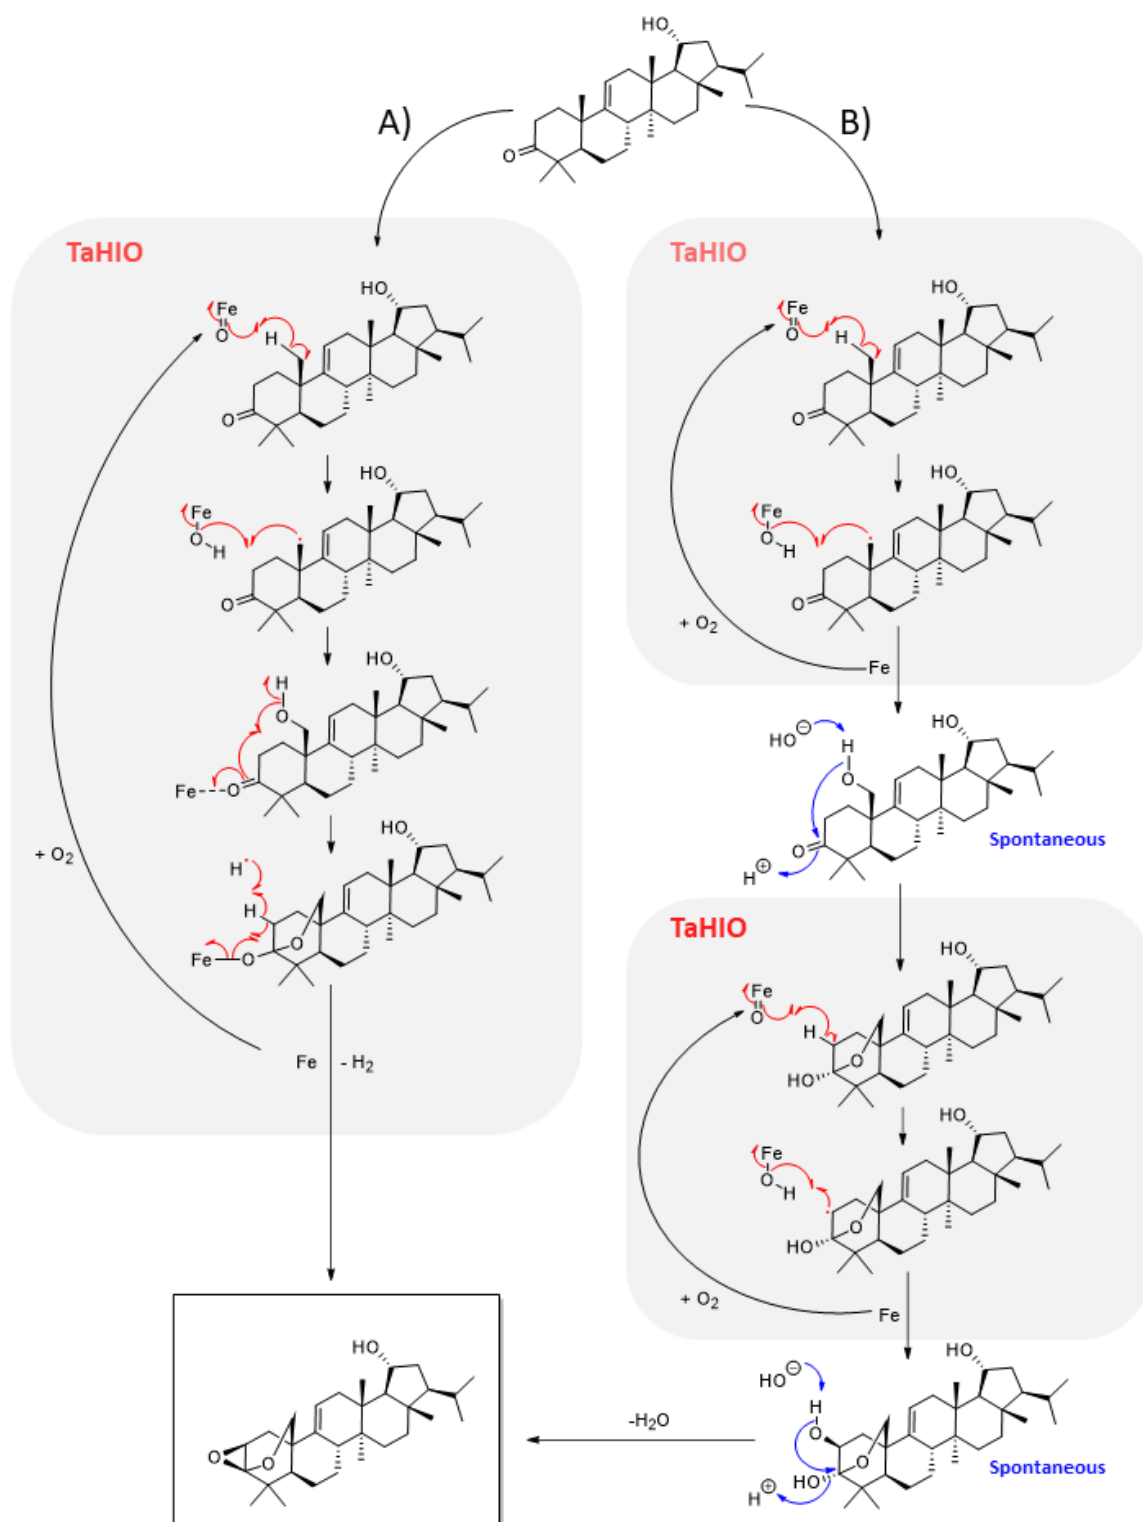

**Fig. S13. Possible reaction mechanisms of TaHIO (TaCYP51H37).** Reaction mechanism may involve one catalytic cycle (A) or alternatively involve two independent catalytic cycles (B).



|     |                                    | 1.   | 2.   | 3.   | 4.   | 5.   | 6.   | 7.   | 8.   | 9.   | 10.  | 11.  | 12.  |
|-----|------------------------------------|------|------|------|------|------|------|------|------|------|------|------|------|
| 1.  | AK067451 O.sativa IAS              | 100  | 62.3 | 63.8 | 49.8 | 56.4 | 56.4 | 56.2 | 54.7 | 54.8 | 56.4 | 56.2 | 55.6 |
| 2.  | AJ311789 A.strigosa bAS            | 62.3 | 100  | 68   | 48.3 | 53.8 | 53.7 | 53.6 | 51.9 | 52.1 | 55.4 | 54.4 | 53.3 |
| 3.  | AK070534 O.sativa ABS              | 63.8 | 68   | 100  | 48.1 | 55.6 | 57.1 | 57.1 | 53.3 | 53.4 | 57.2 | 56.9 | 56.6 |
| 4.  | LOC4344966 O.sativa PTS            | 49.8 | 48.3 | 48.1 | 100  | 56.1 | 55.3 | 55.5 | 53.9 | 53.2 | 56.1 | 54.9 | 54.4 |
| 5.  | Bradi3g22802 B.distachyon IAS      | 56.4 | 53.8 | 55.6 | 56.1 | 100  | 90.4 | 88.3 | 63   | 62.6 | 71.5 | 69.8 | 69.6 |
| 6.  | AS01G014480 A.strigosa IAS         | 56.4 | 53.7 | 57.1 | 55.3 | 90.4 | 100  | 91.3 | 63.5 | 63   | 73.5 | 71.2 | 71.5 |
| 7.  | TraesCS5D02G011800 T.aestivum IAS  | 56.2 | 53.6 | 57.1 | 55.5 | 88.3 | 91.3 | 100  | 62.5 | 62.1 | 71.6 | 69.5 | 69.8 |
| 8.  | AK066327 O.sativa PS               | 54.7 | 51.9 | 53.3 | 53.9 | 63   | 63.5 | 62.5 | 100  | 95.7 | 71.5 | 69   | 67.6 |
| 9.  | AYV65354 O.sativa ORS              | 54.8 | 52.1 | 53.4 | 53.2 | 62.6 | 63   | 62.1 | 95.7 | 100  | 70.3 | 68.1 | 67.1 |
| 10. | AK121211 O.sativa CAS              | 56.4 | 55.4 | 57.2 | 56.1 | 71.5 | 73.5 | 71.6 | 71.5 | 70.3 | 100  | 87.2 | 86.4 |
| 11. | AJ311790 A.strigosa CAS            | 56.2 | 54.4 | 56.9 | 54.9 | 69.8 | 71.2 | 69.5 | 69   | 68.1 | 87.2 | 100  | 92.2 |
| 12. | TraesCS6D02G099400 T.aestivum CAS* | 55.6 | 53.3 | 56.6 | 54.4 | 69.6 | 71.5 | 69.8 | 67.6 | 67.1 | 86.4 | 92.2 | 100  |

**Fig. S14. Percent identity matrix of amino acid sequences of characterised Poaceae cycloartenol- and triterpene- synthases.** Sequence alignment and percent identity matrix was generated with Clustal Omega v2.1. IAS, isoarborinol synthase; bAS, beta-amyrin synthase; ABS, achilleol b synthase; PTS, poaceaetapetol synthase; PS, parkeol synthase; ORS, orysatinol synthase; CAS, cycloartenol synthase. Asterisk denotes a predicted *T. aestivum* CAS annotation, based on phylogeny and a constitutive expression pattern in wheat RNA-seq data.

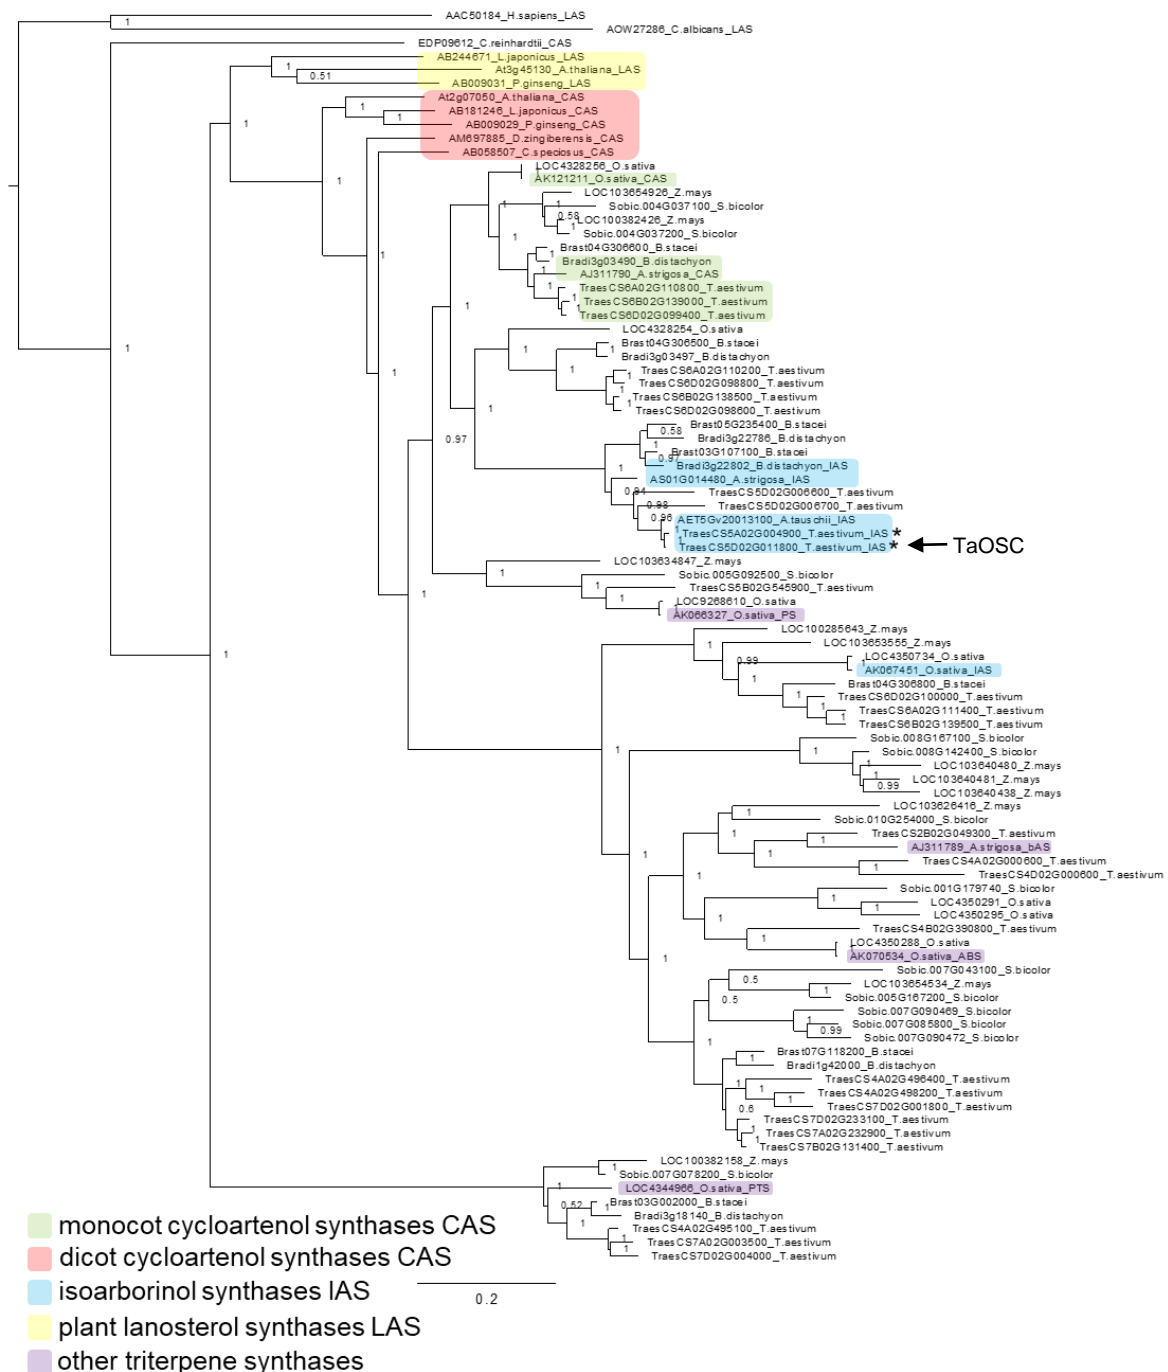

**Fig. S15. phylogeny of predicted oxidosqualene cyclases from wheat, together with selected monocot and dicot OSCs.** Bayesian tree comprised of protein sequences of characterized and non-characterized monocot OSCs and characterized dicot cycloartenol and lanosterol synthases. Cycloartenol synthase from *Chlamydomonas reinhardtii* and lanosterol synthases from *Homo sapiens* and *Candida albicans* are included as outgroups. Sequences were aligned with MUSCLE (with a maximum of 100 iterations) and a phylogenetic tree was generated using MrBayes (34), with a mixed amino acid probability model and default MCMC parameters except 0.7 temperature. TaOSC sequences from 3(5D) and 3(5A) clusters are asterisked. *T. aestivum* and *B. distachyon* CAS annotations are predicted, based on phylogeny and constitutive expression patterns in RNA-seq data. CAS, cycloartenol synthase; IAS, isoarborinol synthase; LAS, lanosterol synthase; bAS, beta-amyrin synthase; PS, parkeol synthase; ABS, achilleol B synthase; PTS, poaceatpetol synthase.

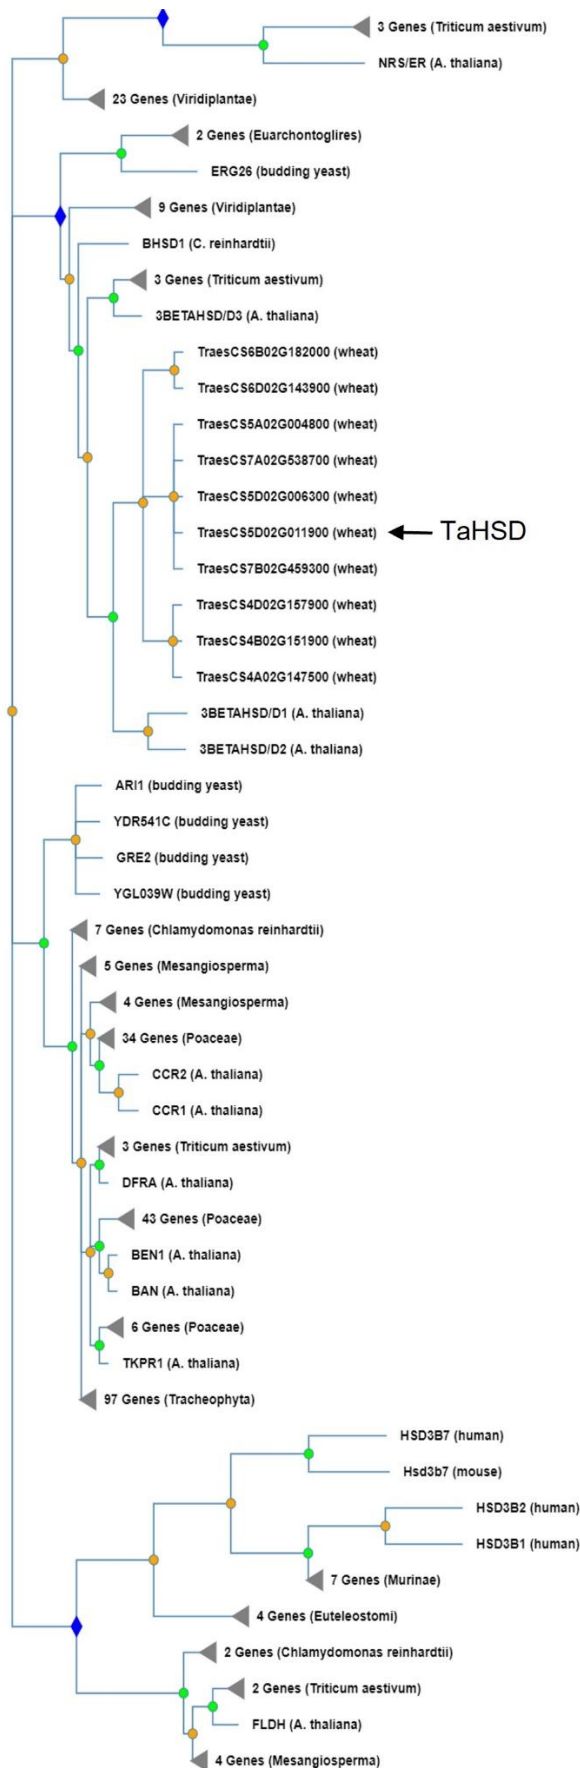

**Fig. S16. Phylogenetic tree of selected members of the NAD dependent epimerase/dehydratase family (Panther family PTHR10366).** The tree was constructed in PhyloGenes v2.0 (<http://www.phylogenes.org/tree/PTHR10366>). TaHSD is clustered with 3βHSD/D1 and 3βHSD/D2 that are take part in sterol biosynthesis in *Arabidopsis thaliana* (35).

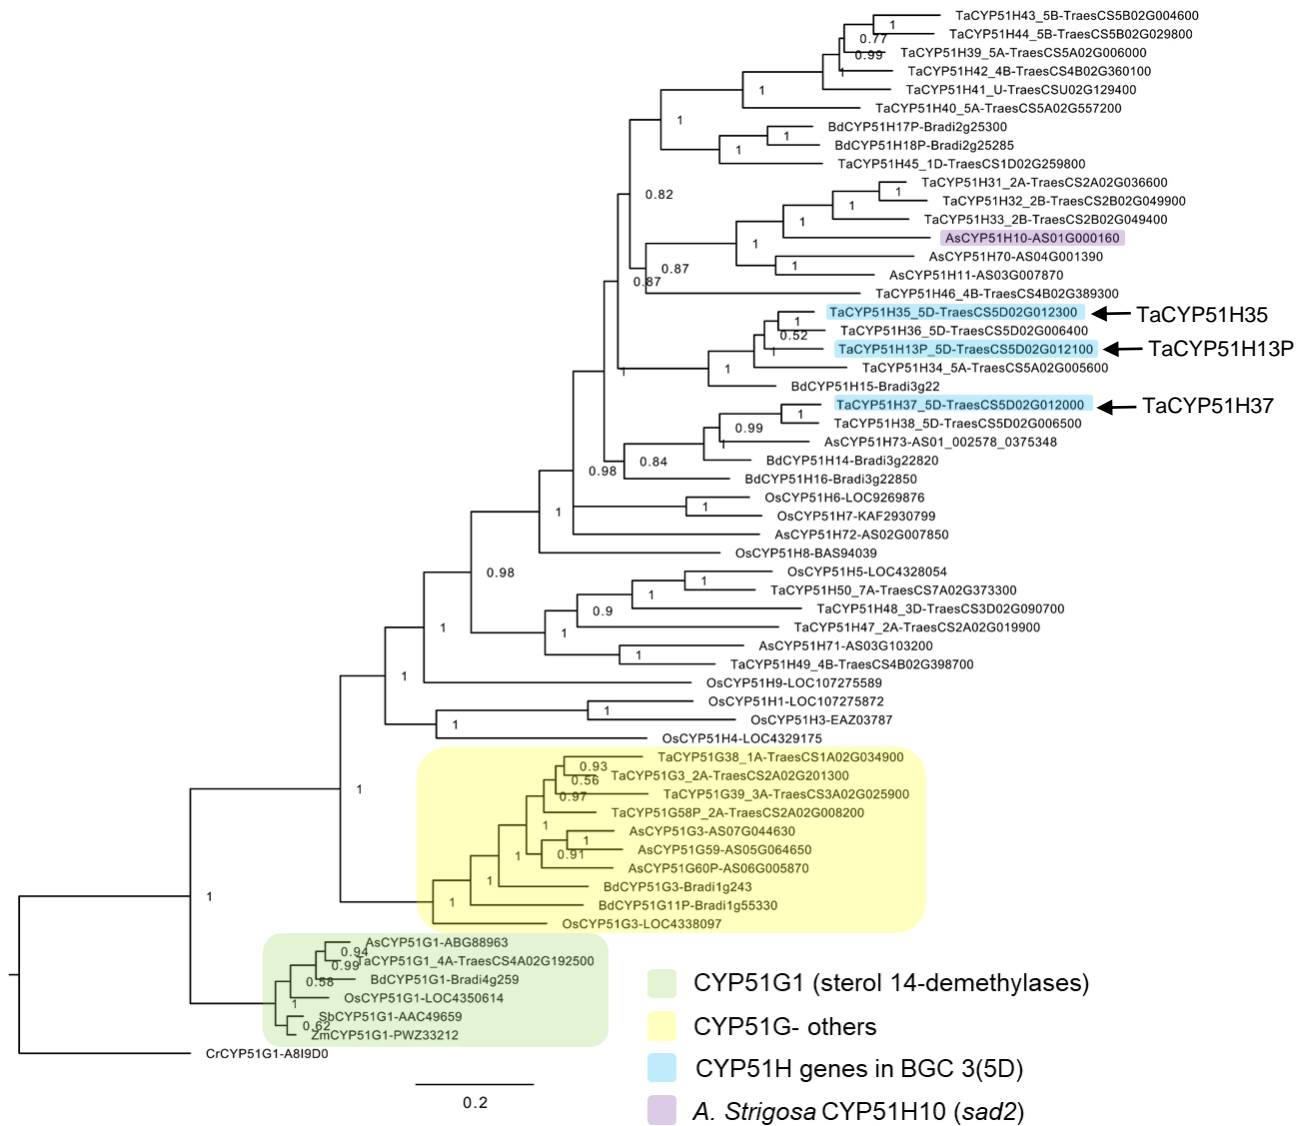

**Fig. S17. Phylogeny of CYP51-family cytochrome P450 proteins identified in wheat, brachypodium, oat and rice.** Peptide sequences of CYP51s were aligned with MUSCLE (with a maximum of 100 iterations) and a phylogenetic tree was generated using MrBayes (34), with a mixed amino acid probability model and default MCMC parameters. The tree includes one representative homoeolog of each assigned wheat CYP51. For a tree including all identified wheat homoeologs, see Fig. 18. Ta, *Triticum aestivum*; Bd, *Brachypodium distachyon*; Os, *Oryza sativa*; As, *Avena strigosa*; Zm, *Zea mays*; Sb, *Sorghum bicolor*; Cr, *Chlamydomonas reinhardtii*.

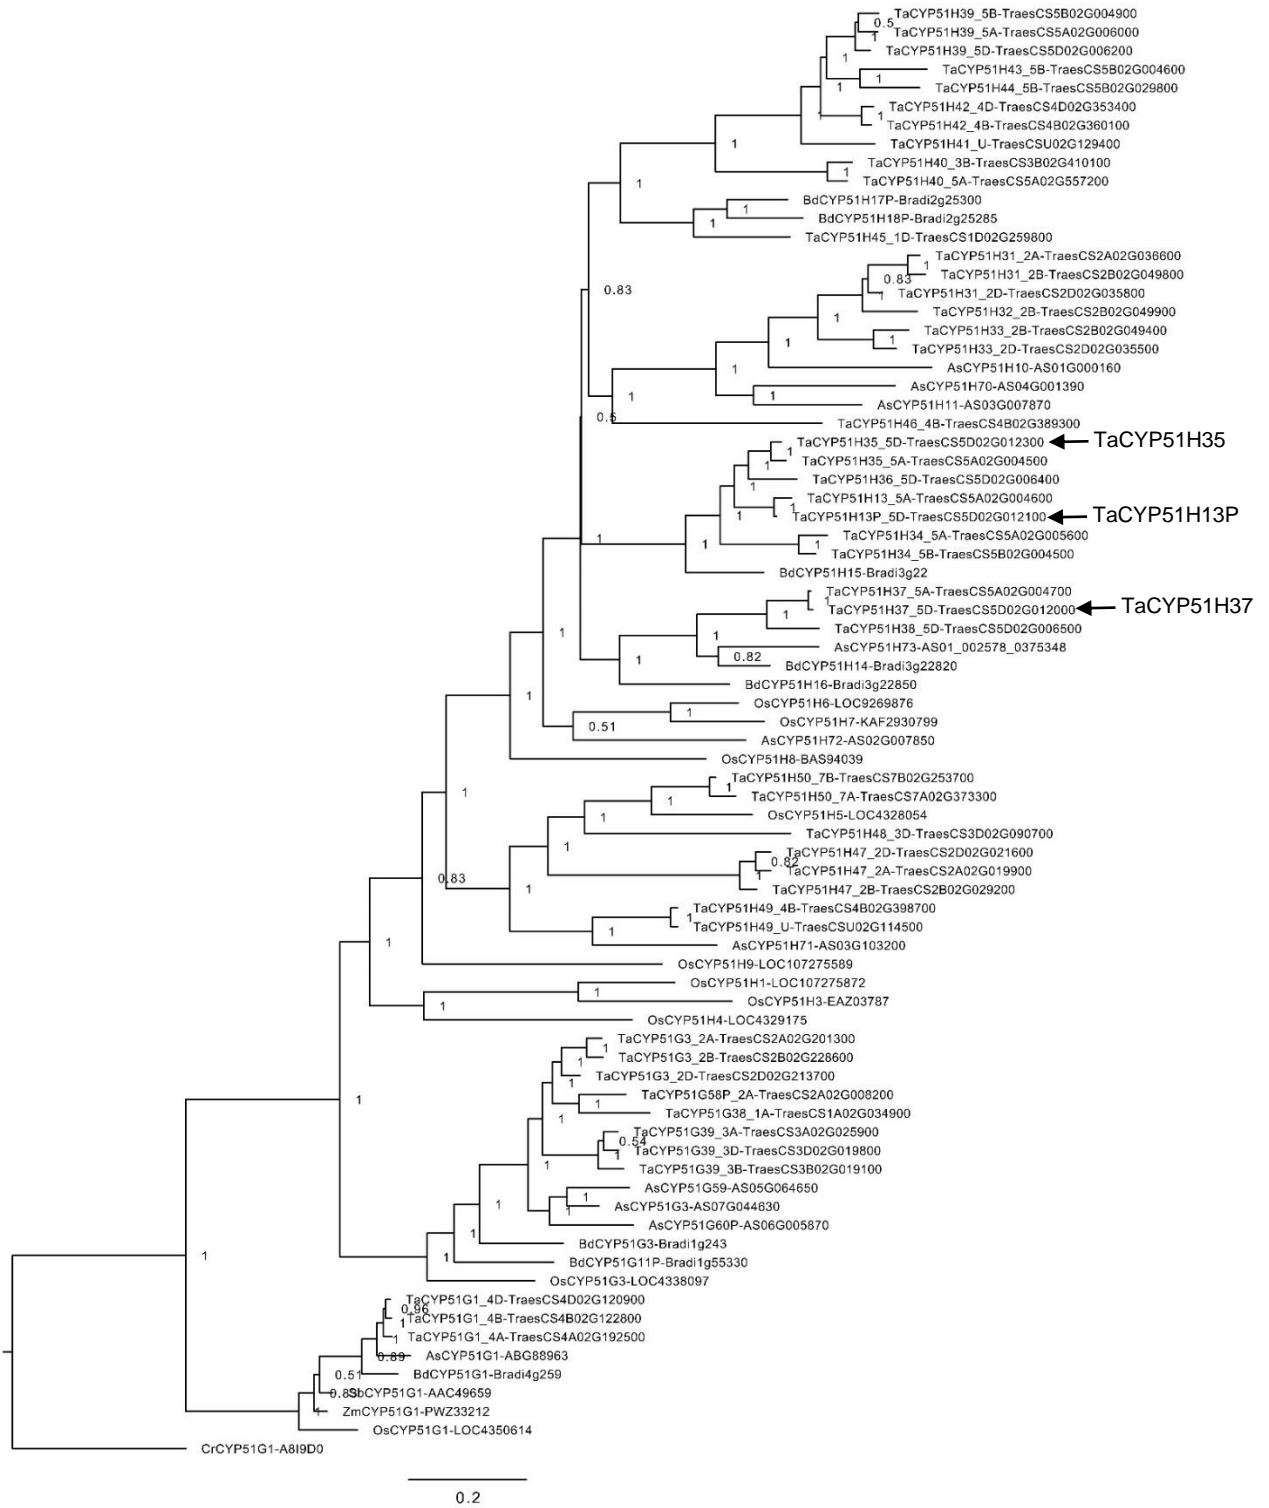

**Fig. S18.** Bayesian tree of CYP51 genes from wheat, brachypodium, oat and rice.

**A**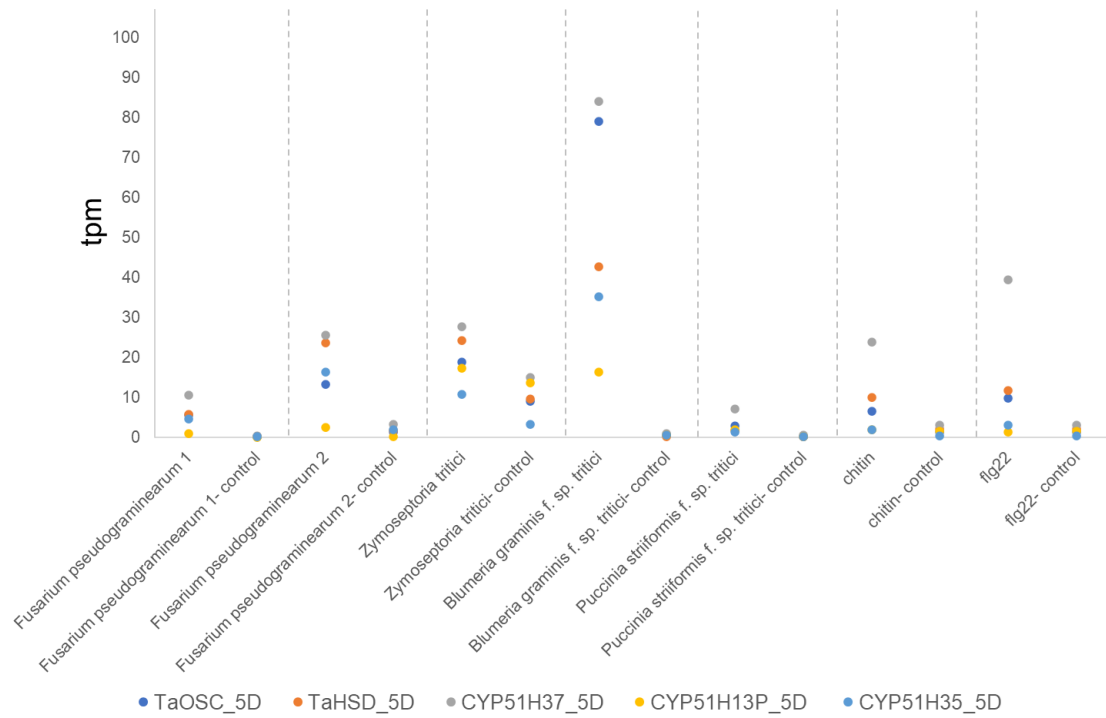**B**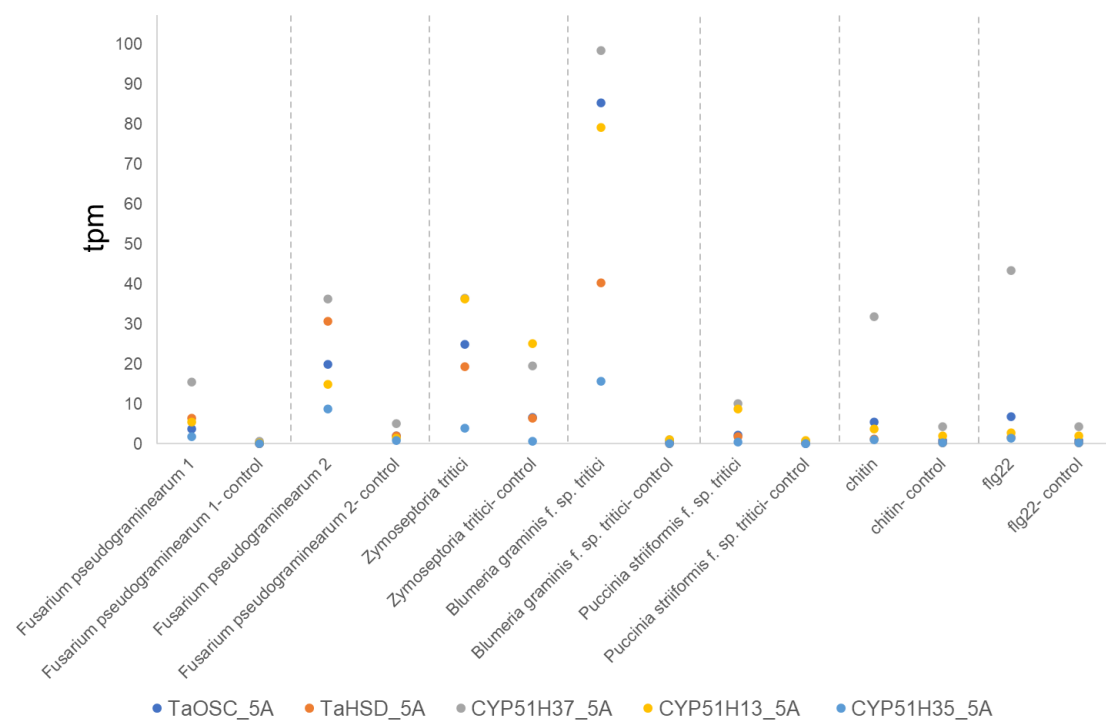

**Fig. S19. Expression of wheat clustered genes under biotic stress.** (A) Genes in Chr.5D cluster. (B) genes in Chr.5A cluster. Expression data extracted from <http://www.wheat-expression.com> includes studies applying treatment with *Fusarium pseudograminearum* (study 1: (36), study 2: (37)), *Zymoseptoria tritici* (38), *Blumeria graminis* (39), *Puccinia striiformis* (40), chitin (14), or flg22 (14). TaCYP51H13P\_5D values are average of TraesCS5D01G012100 and TraesCS5D01G012200. tpm, transcripts per million.

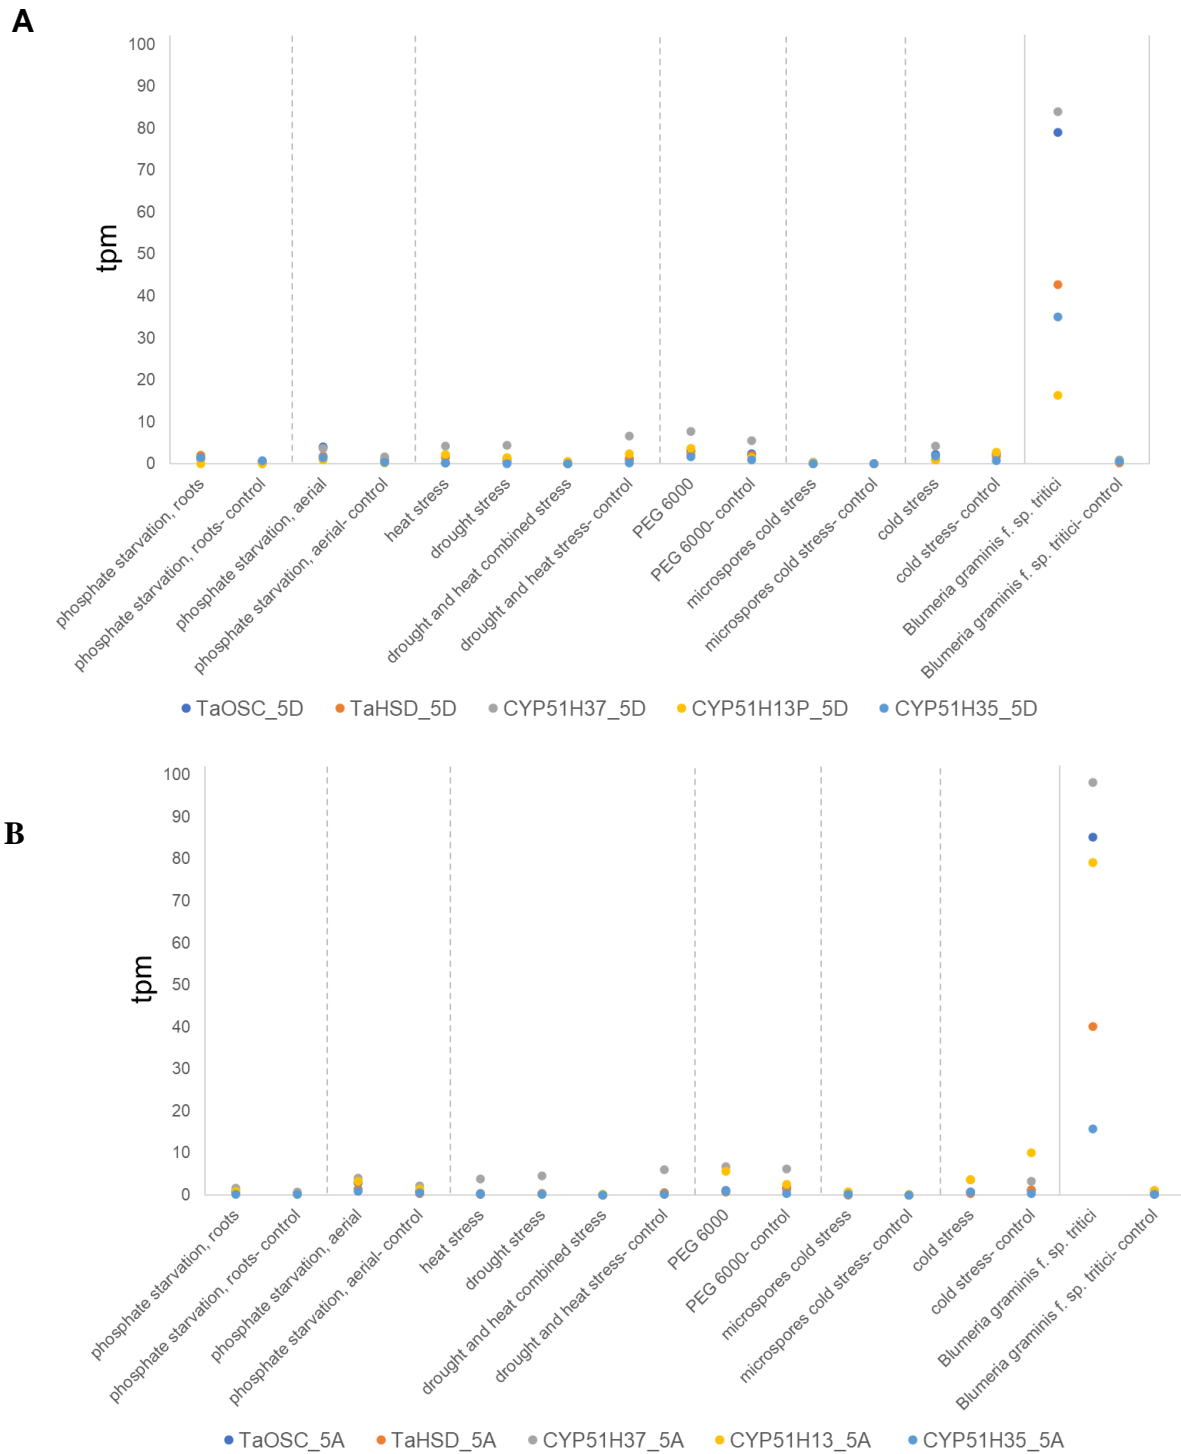

**Fig. S20. Expression of wheat clustered genes under abiotic stress.** (A) Genes in Chr.5D cluster. (B) Genes in Chr.5A cluster. Expression data extracted from <http://www.wheat-expression.com> includes studies applying phosphate starvation (41), heat and drought stress (42), PEG 6000, microspores cold stress (43) and cold stress (44). TaCYP51H13P\_5D values are average of TraesCS5D01G012100 and TraesCS5D01G012200. Data of powdery mildew infection experiment (*Blumeria graminis f. sp. tritici*) (39) is shown for comparison. tpm, transcripts per million.

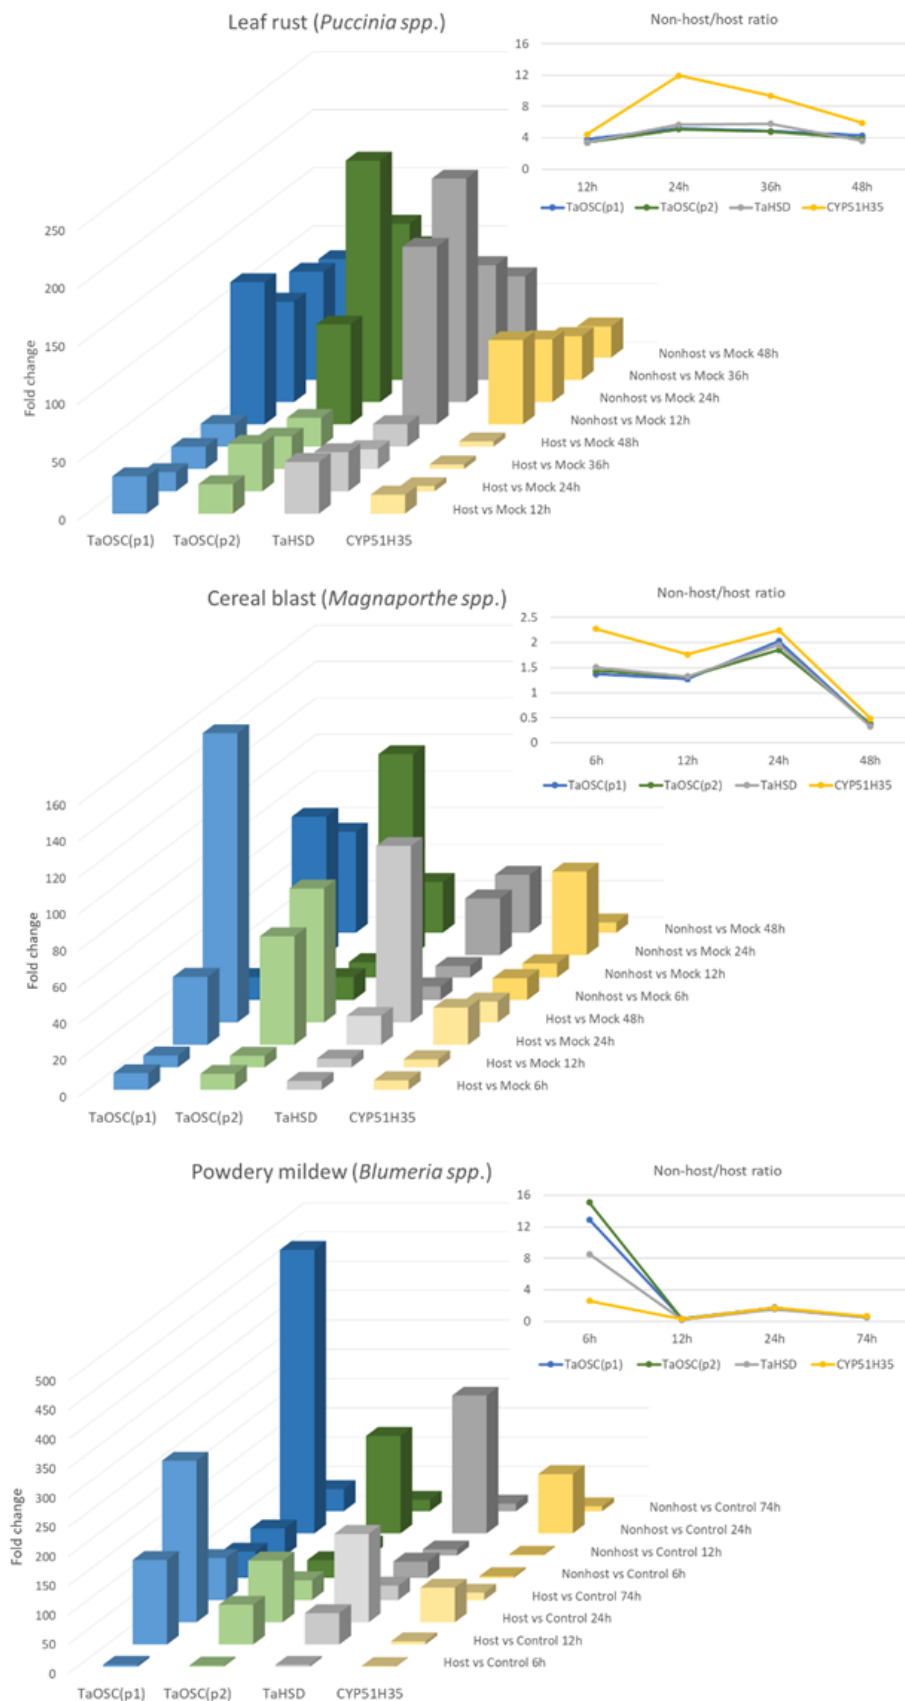

**Fig. S21. Wheat clustered genes TaOSC, TaHSD and TaCYP51H35 are induced by infection of wheat plants with adapted and non-adapted isolates of leaf rust, cereal blast, or powdery mildew.** Microarray probe signal intensities are plotted in 3D-columns showing fold change expression in adapted and non-adapted vs. control experiments. 2D plots show fold change ratio of non-adapted/adapted vs. control, per each time point. TaOSC is represented by two probes.



**A**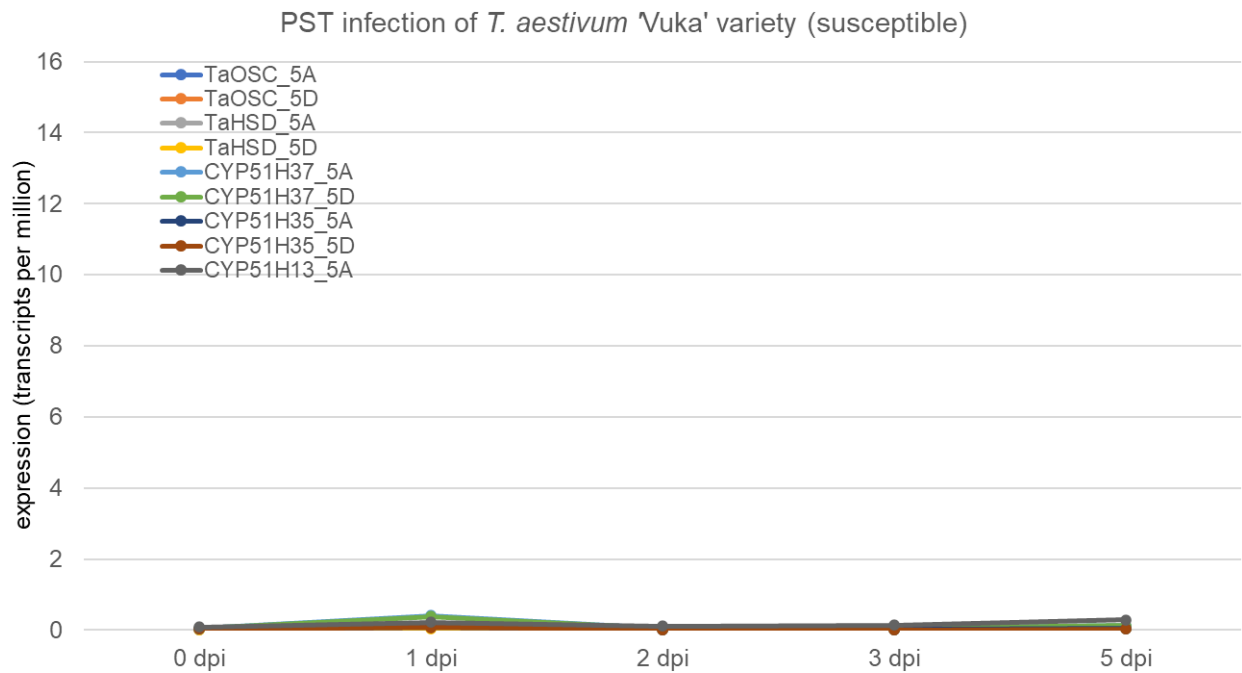**B**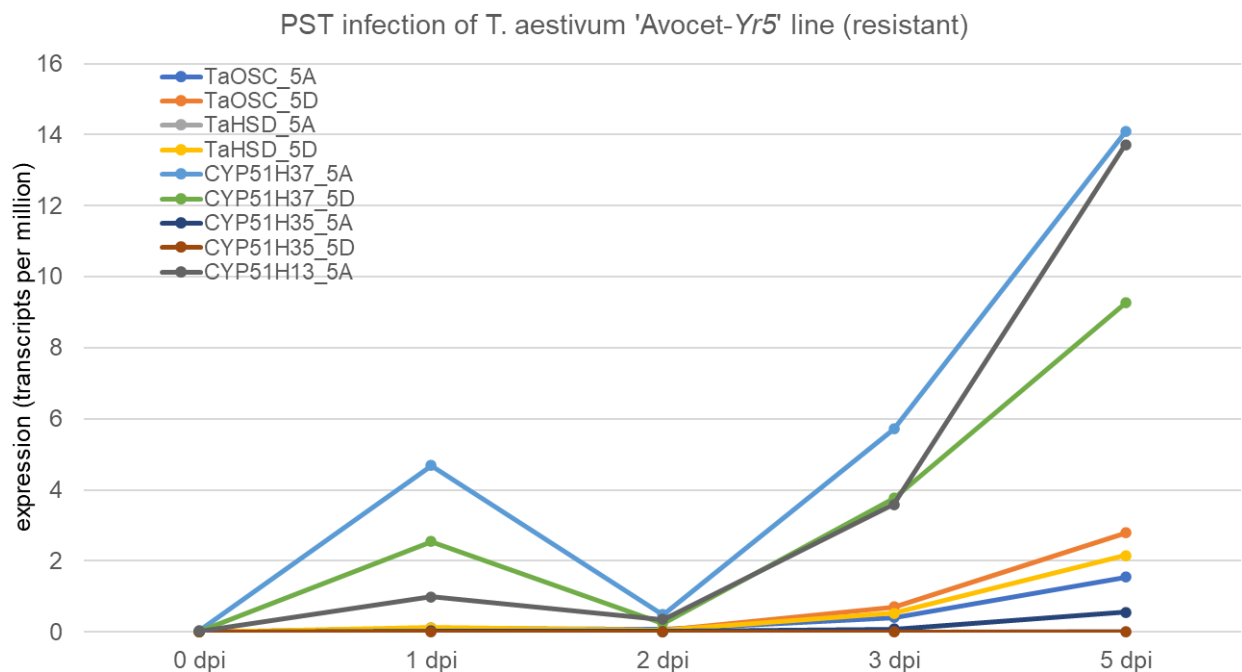

**Fig. S22. Induction of wheat cluster genes following infection with yellow rust (*Puccinia striiformis* f. sp. *tritici*) is suppressed in a susceptible variety.** Expression values were extracted from RNA-seq data of a susceptible wheat variety 'Vuka' (A), or a resistant 'Avocet' introgression line (B), infected with yellow rust, 0, 1, 2, 3, and 5 days post infection.

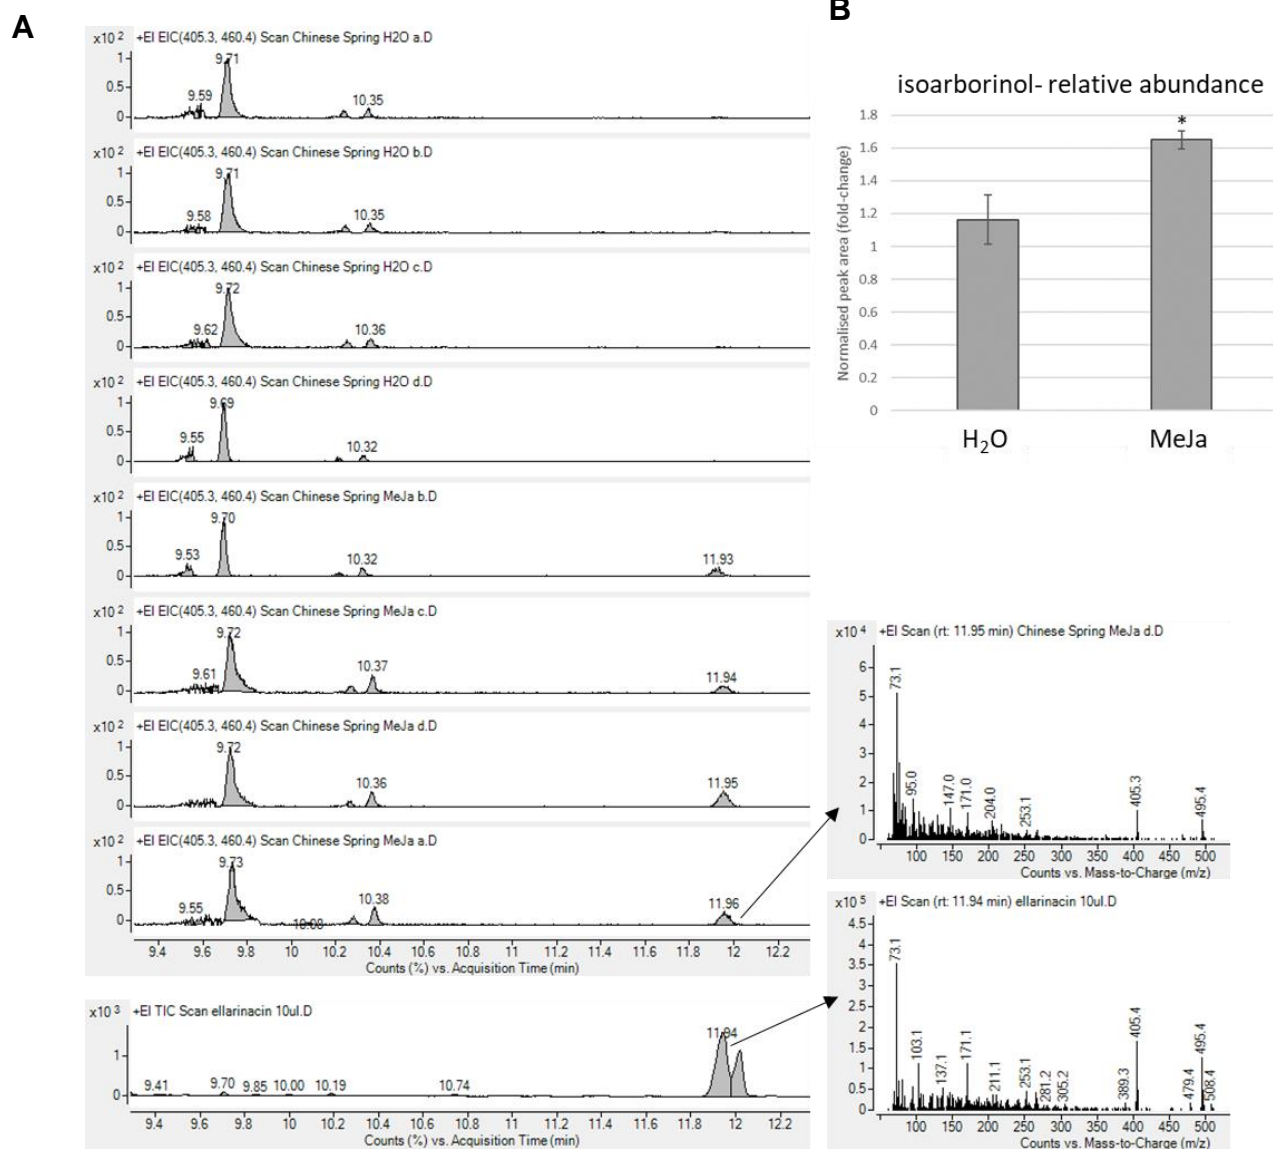

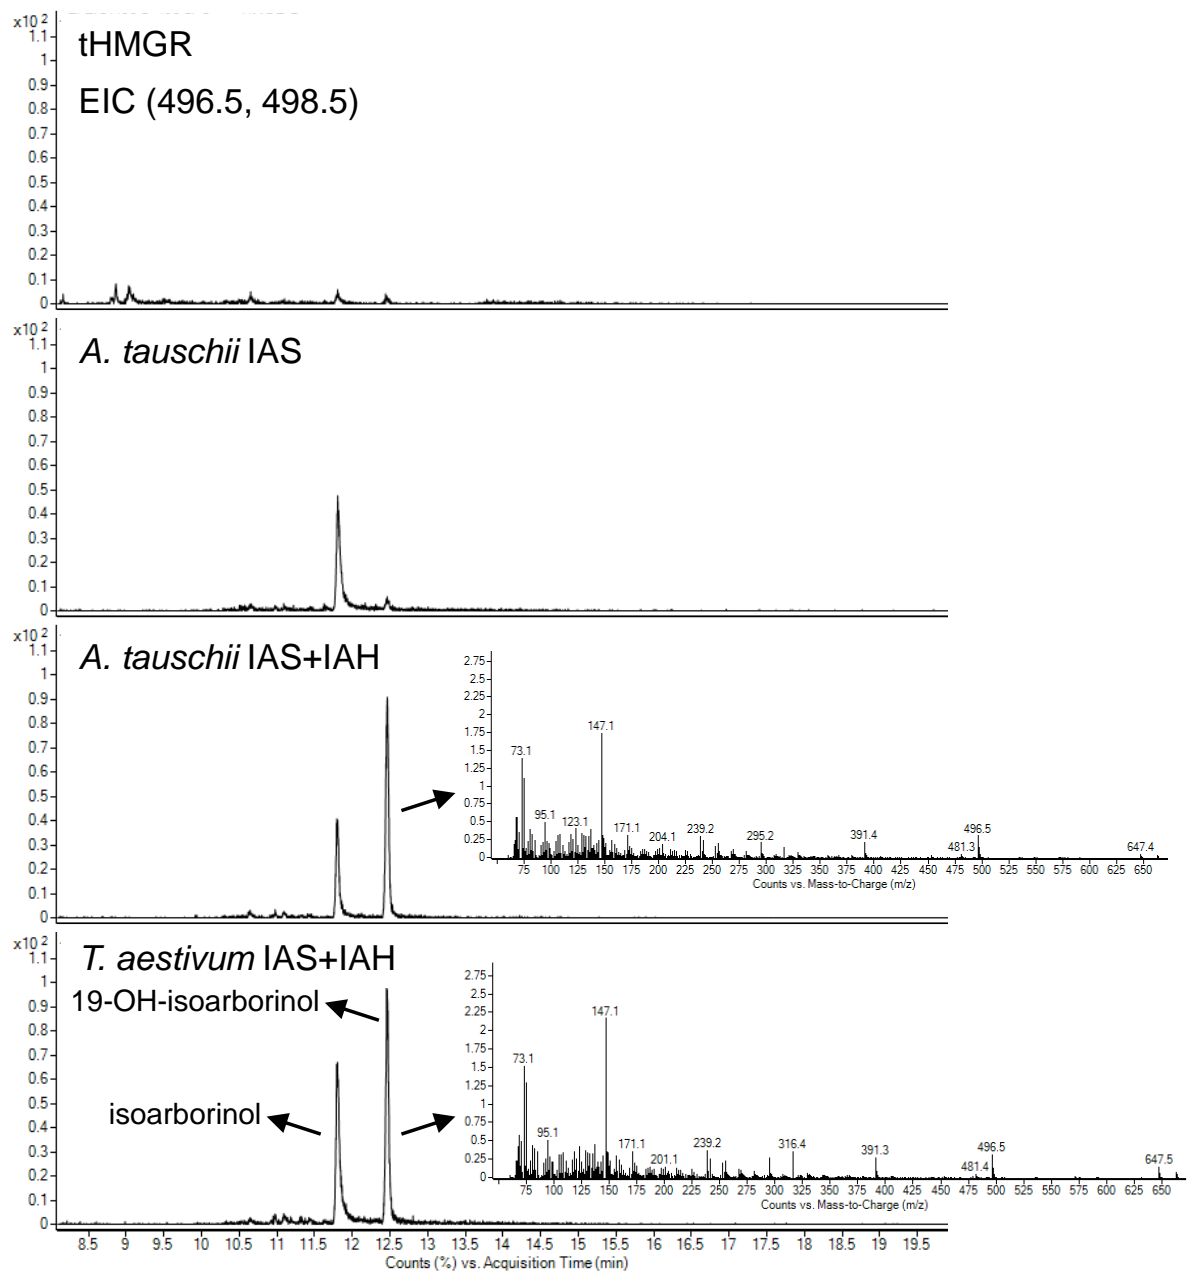

**Fig. S24.** GC-MS analysis of *Aegilops tauschii* IAS and IAH expression in *N. benthamiana*. EIC, extracted ion chromatogram of fragment ions representing isoarborinol (498.5) and 19-hydroxy-isoarborinol (496.5). Analysis of wheat IAS and IAH expression is provided for reference.

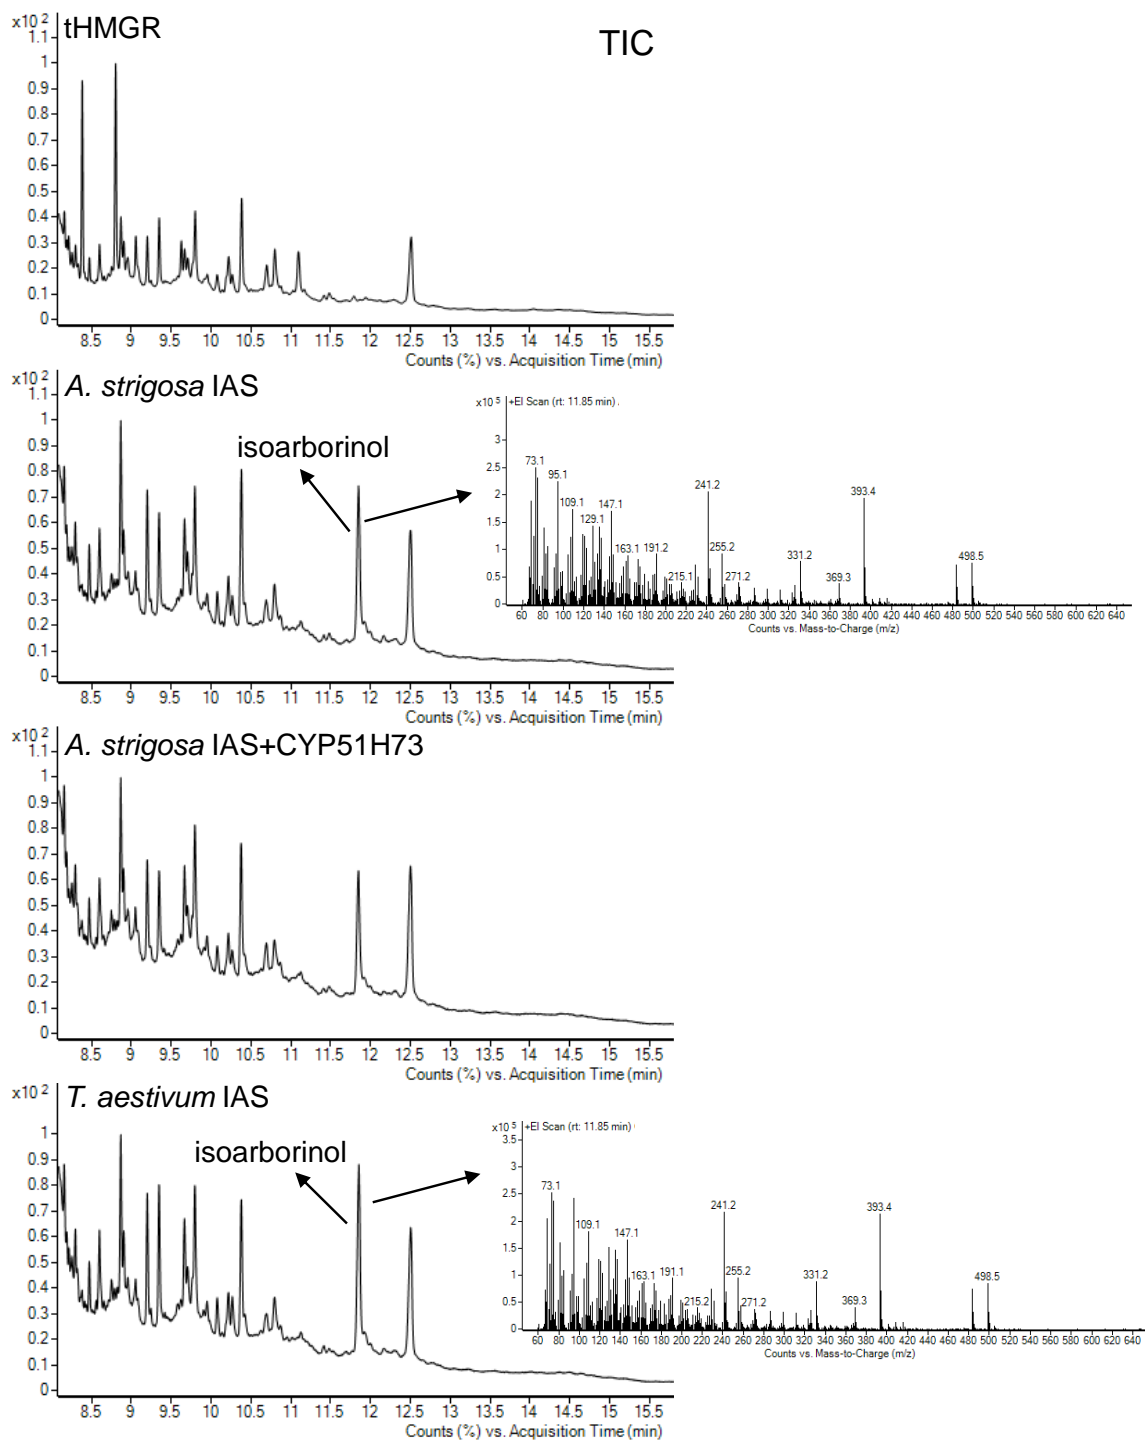

**Fig. S25.** GC-MS analysis of *Avena strigosa* IAS and CYP51H73 expression in *N. benthamiana*. TIC, total ion chromatogram. Analysis of wheat IAS expression is provided for reference.

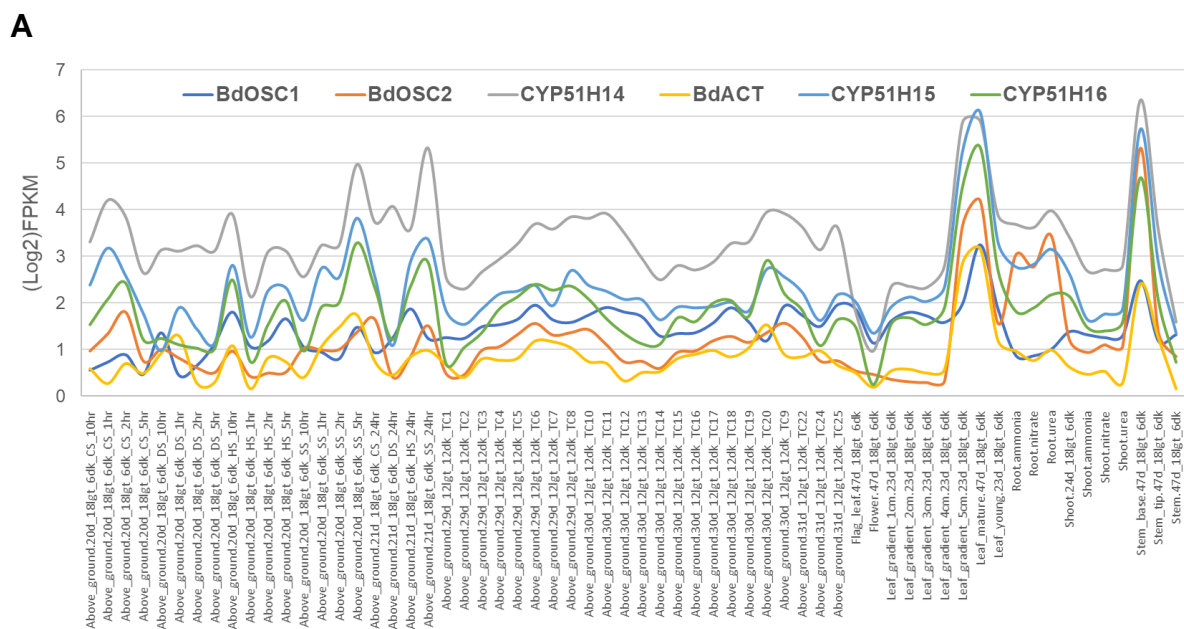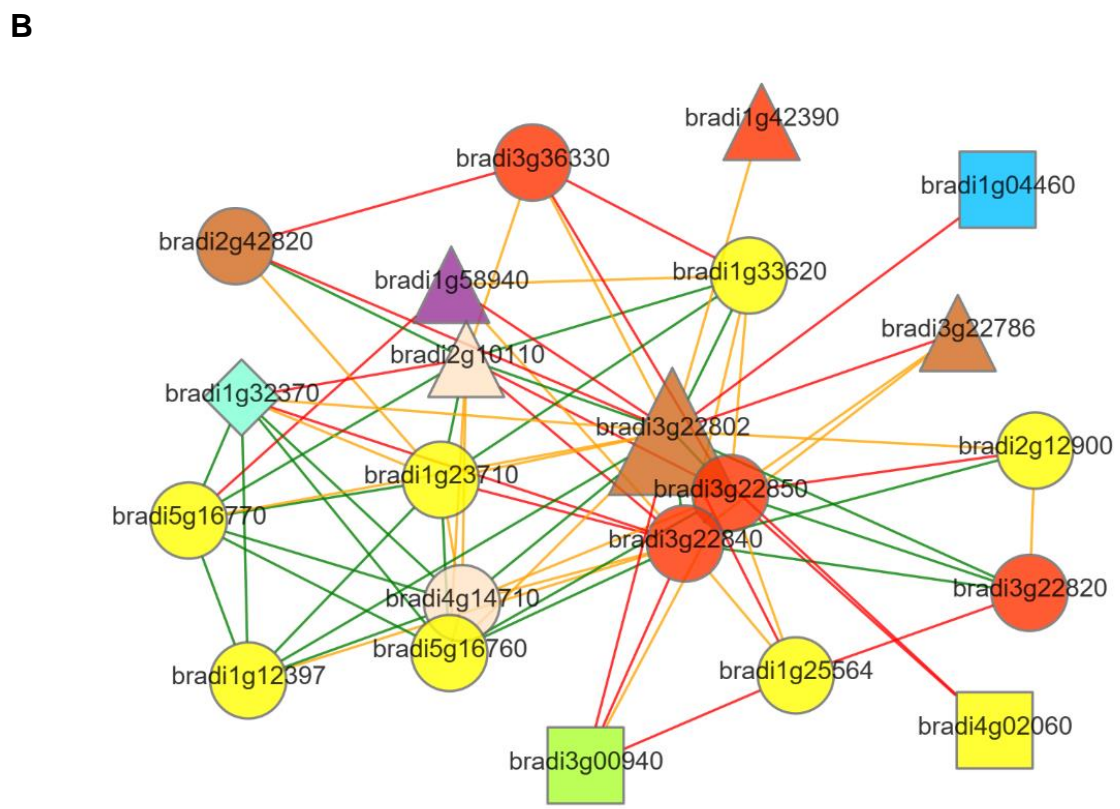

**Fig. S26. Triterpene-related clustered genes on *B. distachyon* Chr.03 are co-expressed.** (A) Gene expression data extracted from JGI Phytozome Gene Atlas (release 1.0), plotted as Log2 of FPKM values. (B) Co-expression network (1<sup>st</sup> level) neighbourhood of bradi3g22802 (BdOSC2) extracted from PlaNet (<http://www.gene2function.de/>), shows it is co-expressed with cluster genes: Bradi3g22786, Bradi3g22820, Bradi3g22840 and Bradi3g22850.

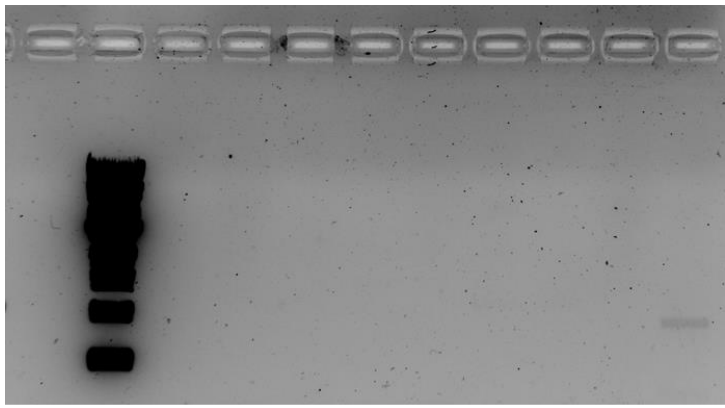

ntc 2s 2r 14st 14l 60sp 60r 60l 60st

**Fig. S27. Semiquantitative RT-PCR of Bradi3g22830.** Amplification of Bradi3g22830 from *B. distachyon* mature stem base cDNA is observed only with prolonged camera exposure (8 sec.). ntc, no template control; 2s, seedling shoot (2 day old); 2r, seedling root; 14st, young plant stem base (14 day old); 14l, young plant leaf; 60sp, mature plant spike (60 day old); 60r, mature plant root; 60l, mature plant leaf; 60st, mature plant stem base.

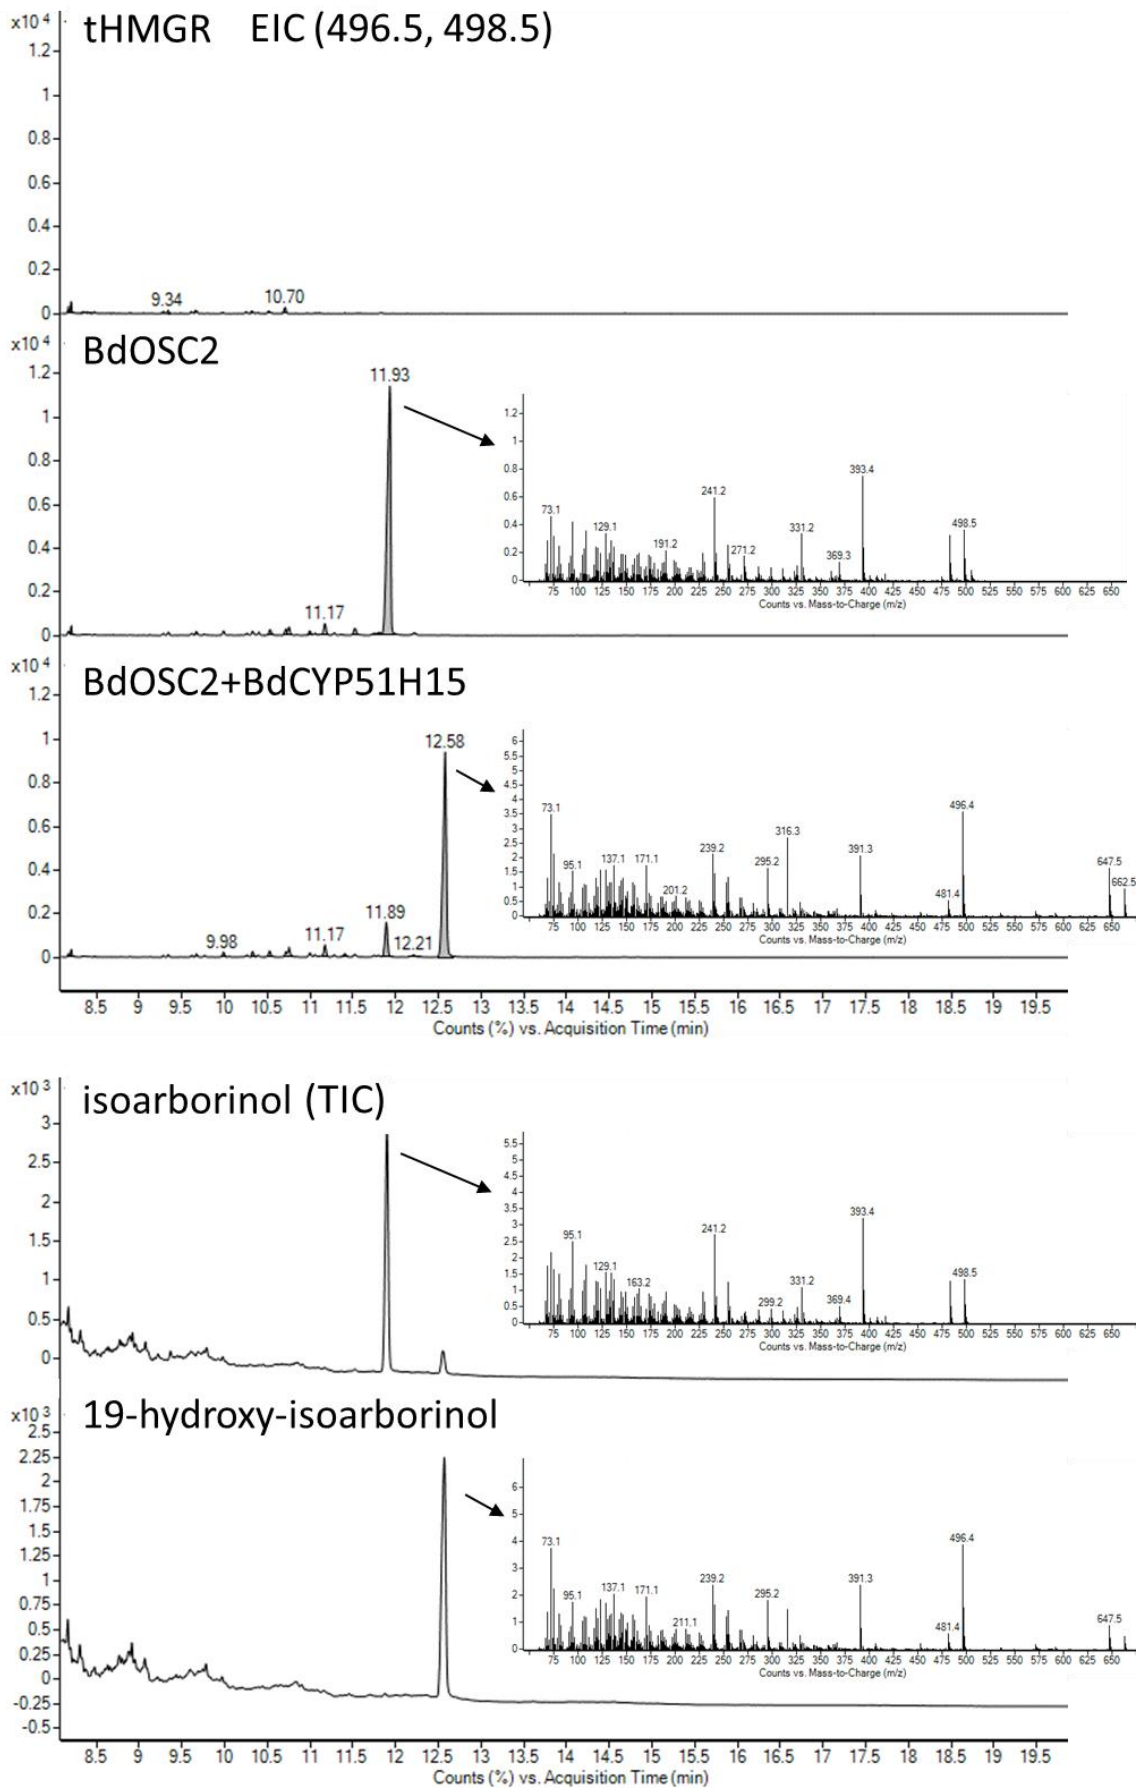

**Fig. S28.** GC-MS analysis of *B. distachyon* genes **BdOSC2** and **BdCYP51H15** expression in *N. benthamiana*. Extracted ion chromatograms for ions representing isoarborinol (498.5, Rt 11.93), and 19-hydroxy-isoarborinol brachynacin (496.5, Rt 12.58) and mass spectra at retention times of product peaks are shown. All gene expression combinations included oat tHMGR. Products were identified based on comparison to isoarborinol and 19-hydroxy-isoarborinol purified from *N. benthamiana*.

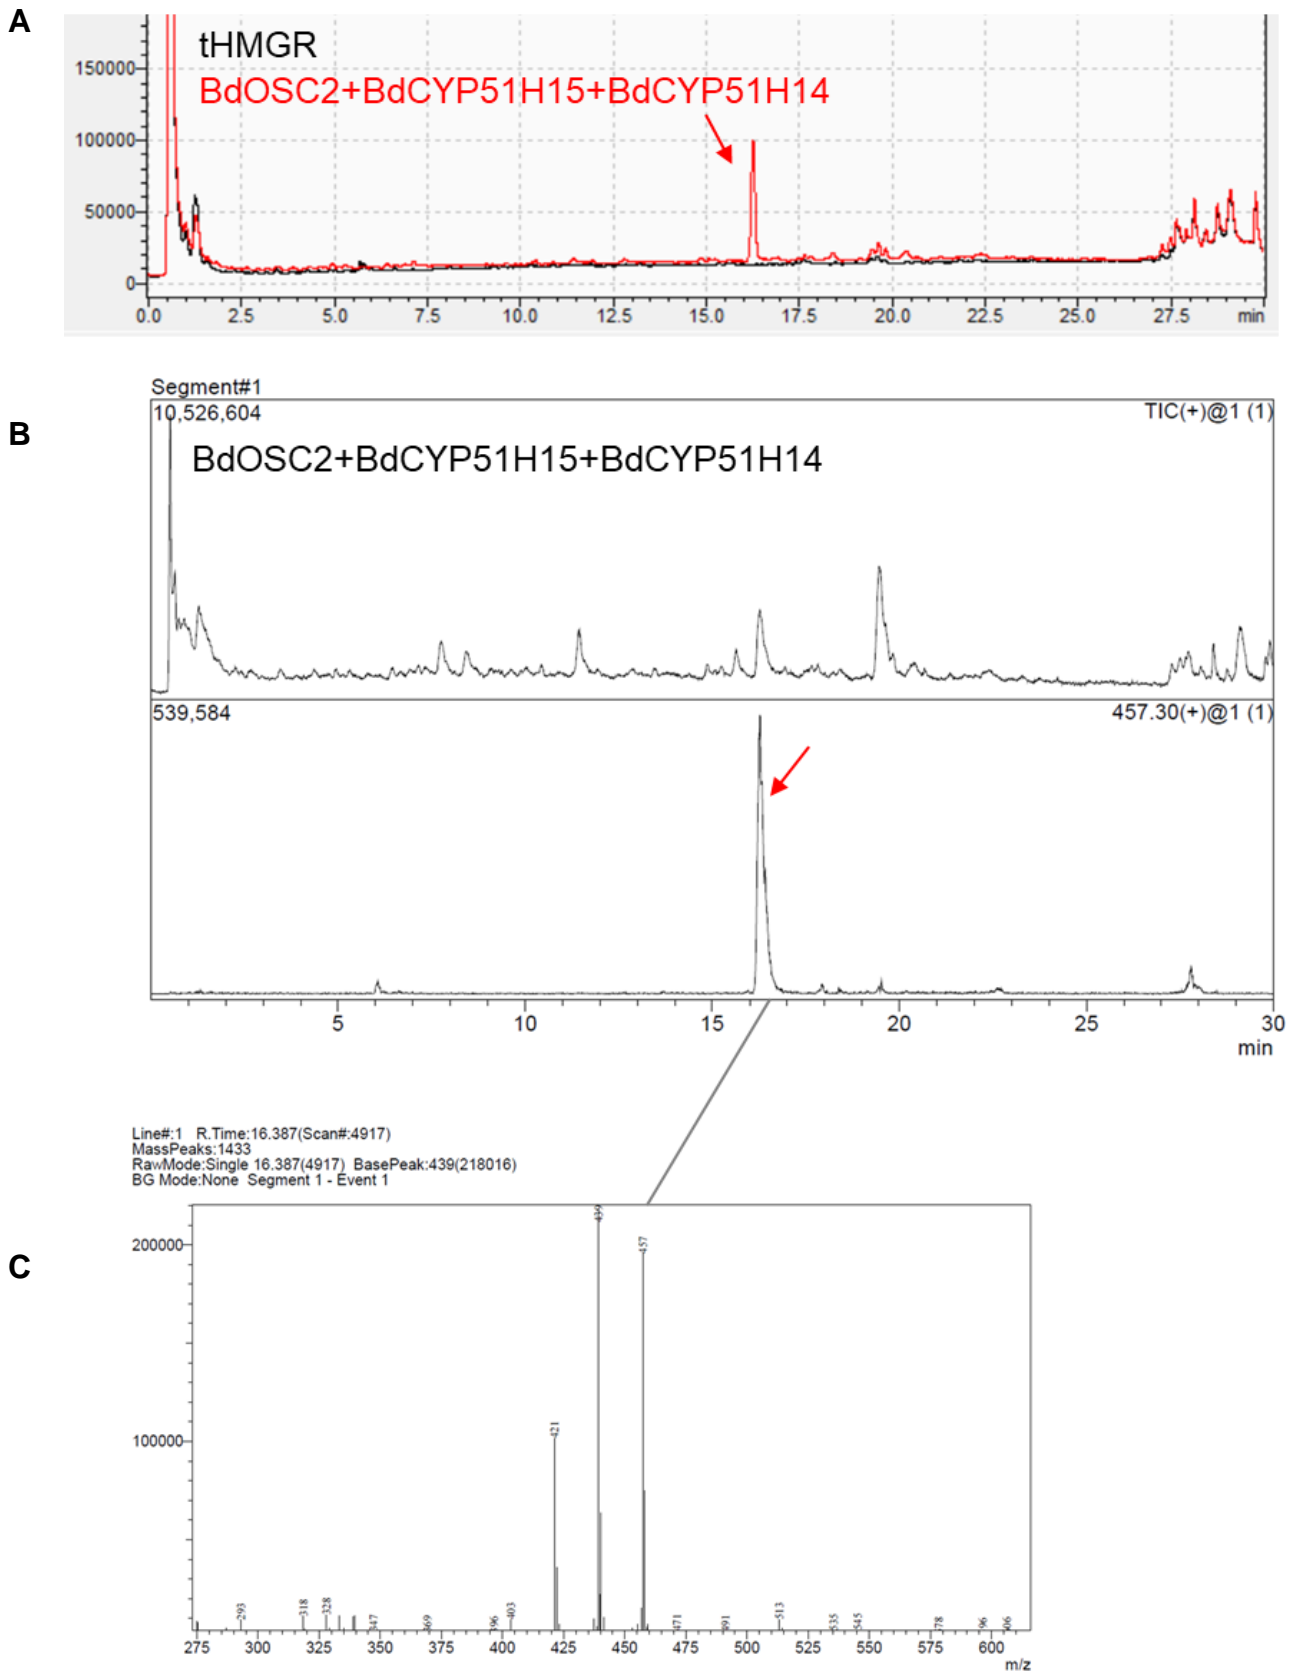

**Fig. S29. LC-MS detection of 7,19,28-trihydroxy-isoarborinol molecular ion.** (A) CAD chromatogram. (B) MS chromatogram- TIC and EIC of 457.3. (C) mass spectra at peak retention time.



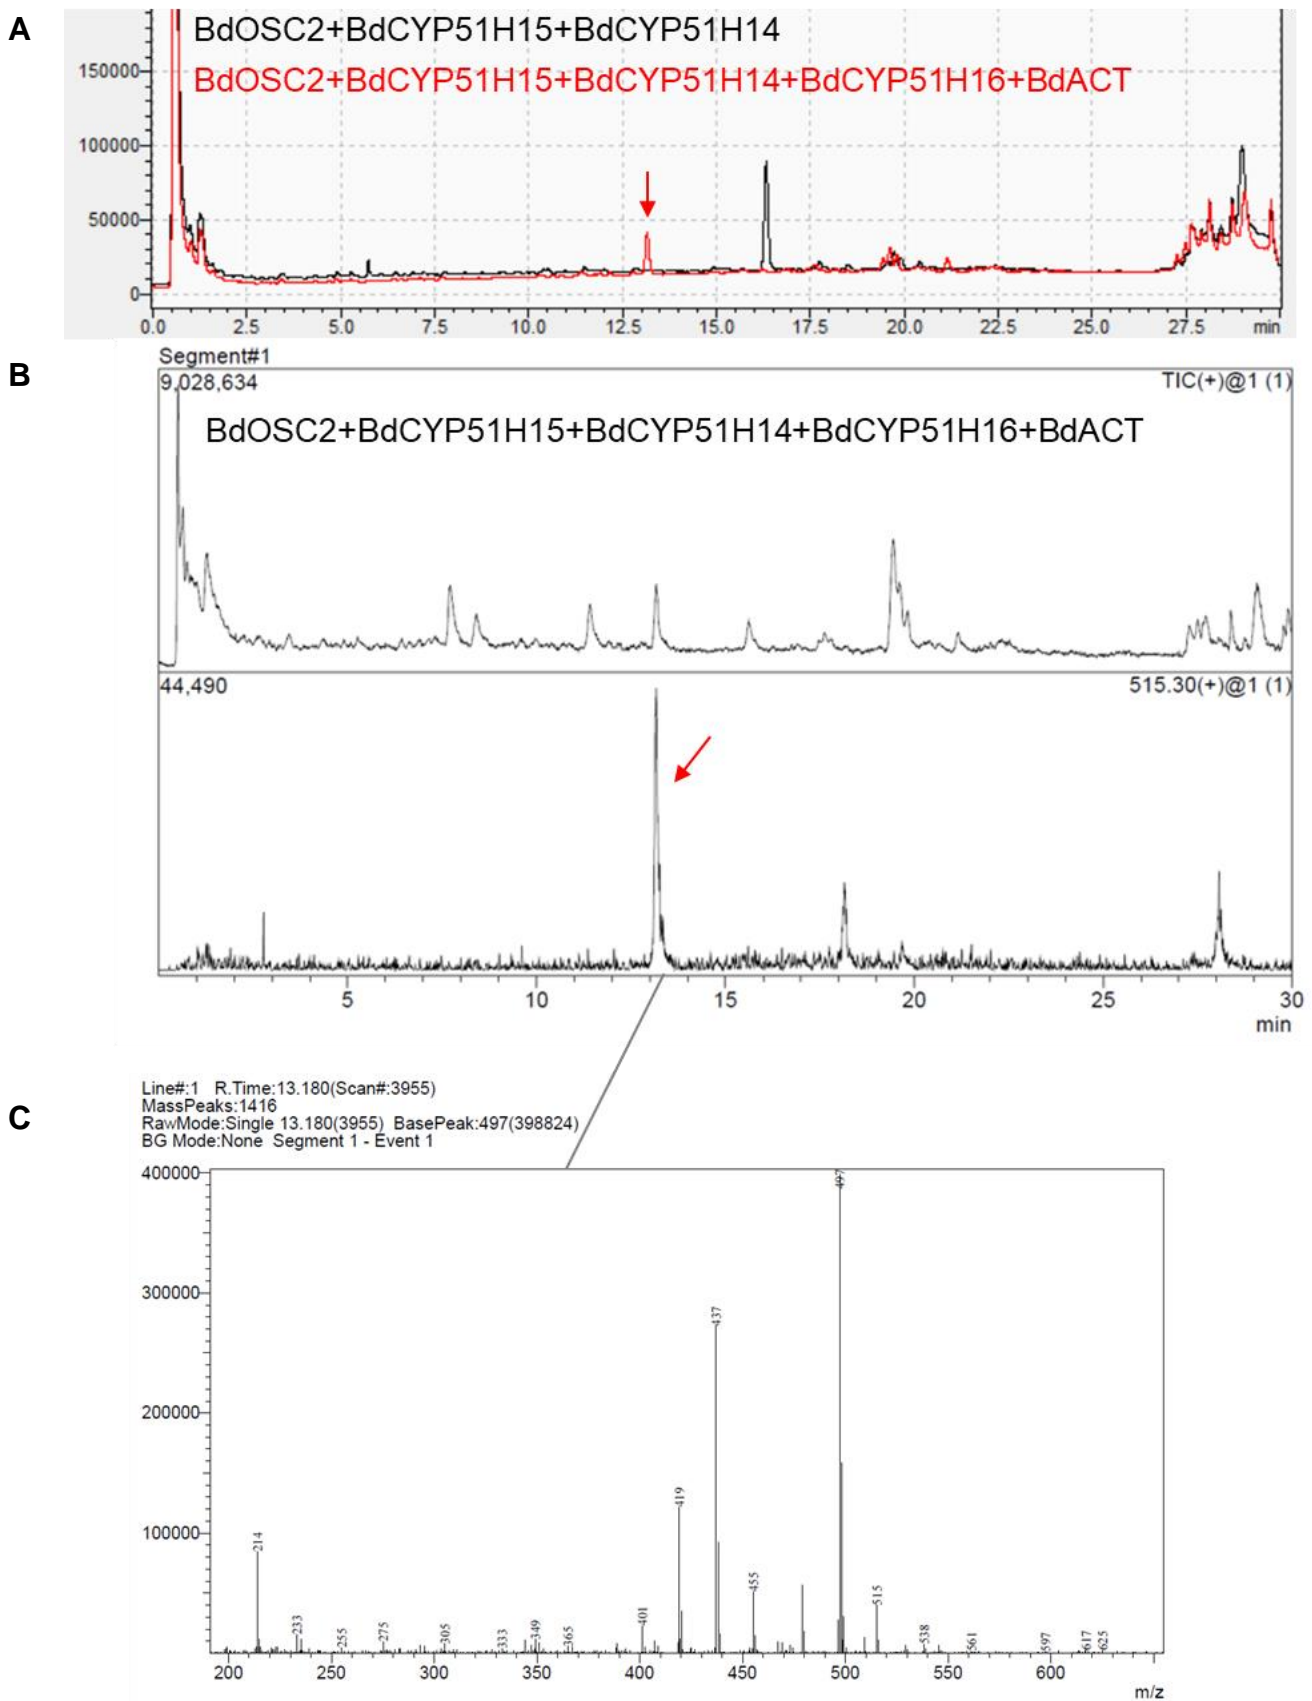

**Fig. S30. LC-MS detection of brachynacin molecular ion.** (A) CAD chromatogram, (B) MS chromatogram- TIC and EIC of 515.3. (C) mass spectra at peak retention time.

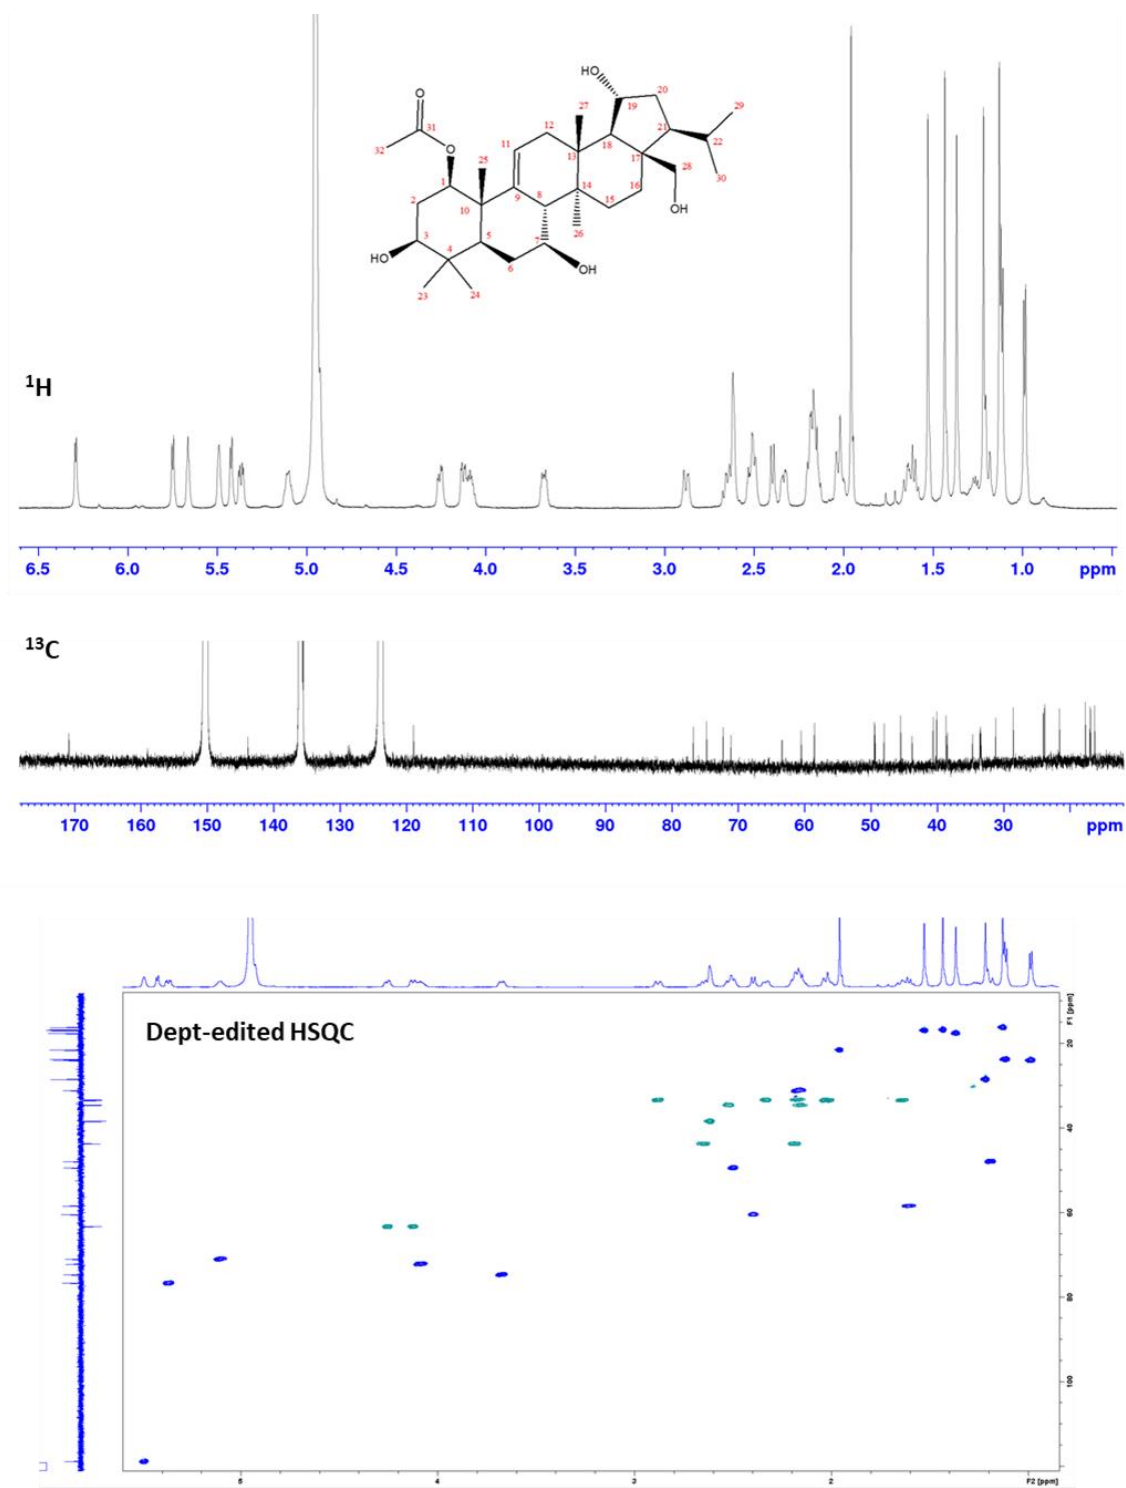

**Fig. S31.**  $^1\text{H}$ ,  $^{13}\text{C}$ , and dept-edited HSQC spectra for brachynacin (Pyridine- $\text{d}_5$ ). Referenced to residual solvent peak ( $^1\text{H}$   $\delta$ : 8.74) ( $^{13}\text{C}$   $\delta$ : 150.3)]. 600 MHz instrument.

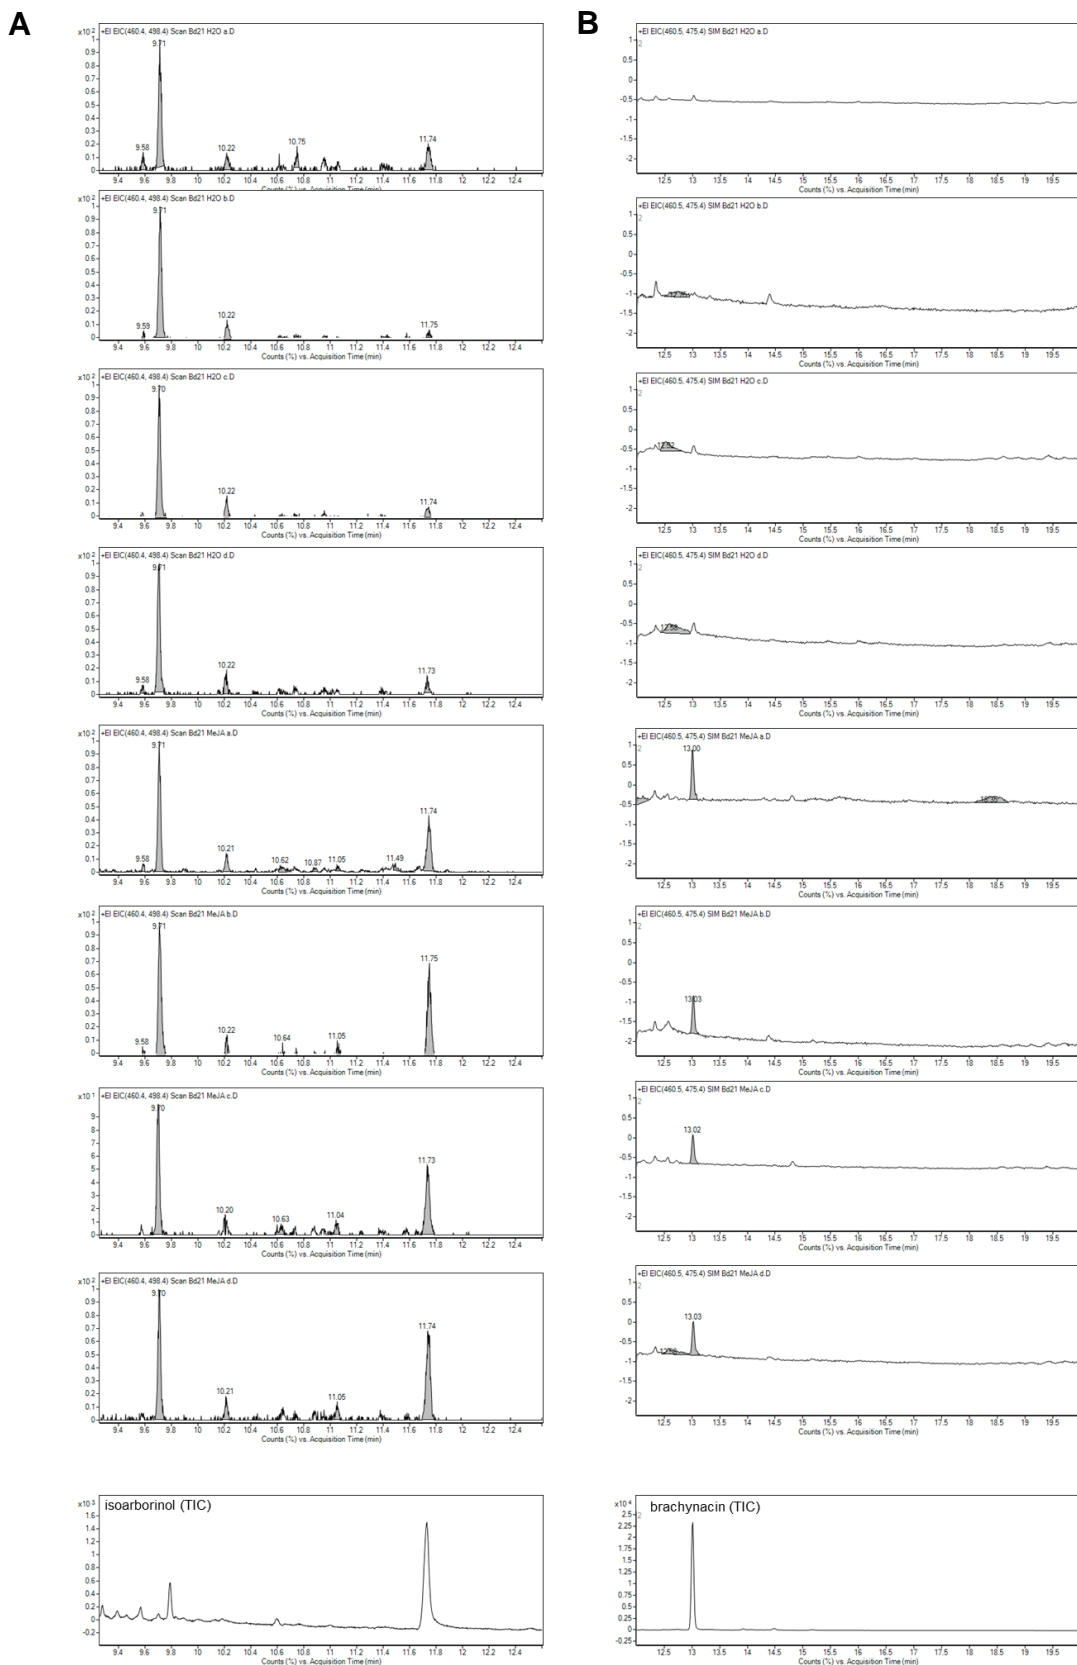

**Fig. S32. GC-MS analysis of TMS-derivatized extracts from *B. distachyon* leaves treated with methyl jasmonate (MeJa), or H<sub>2</sub>O (control) for 12 hours.** Extracted ion chromatograms are for ions representing (A) isoarborinol (498.4, Rt 11.73), 5 $\alpha$ -cholestan-3 $\beta$ -ol (460.4, Rt 9.70) and (B) brachynacin (475.4, Rt 13.02). Y-axes are linked to peak of internal standard- 5 $\alpha$ -cholestan-3 $\beta$ -ol. Extracts from four biological replicates are shown. *B. distachyon* extracts were compared to isoarborinol and brachynacin purified from *N. benthamiana* for identification.

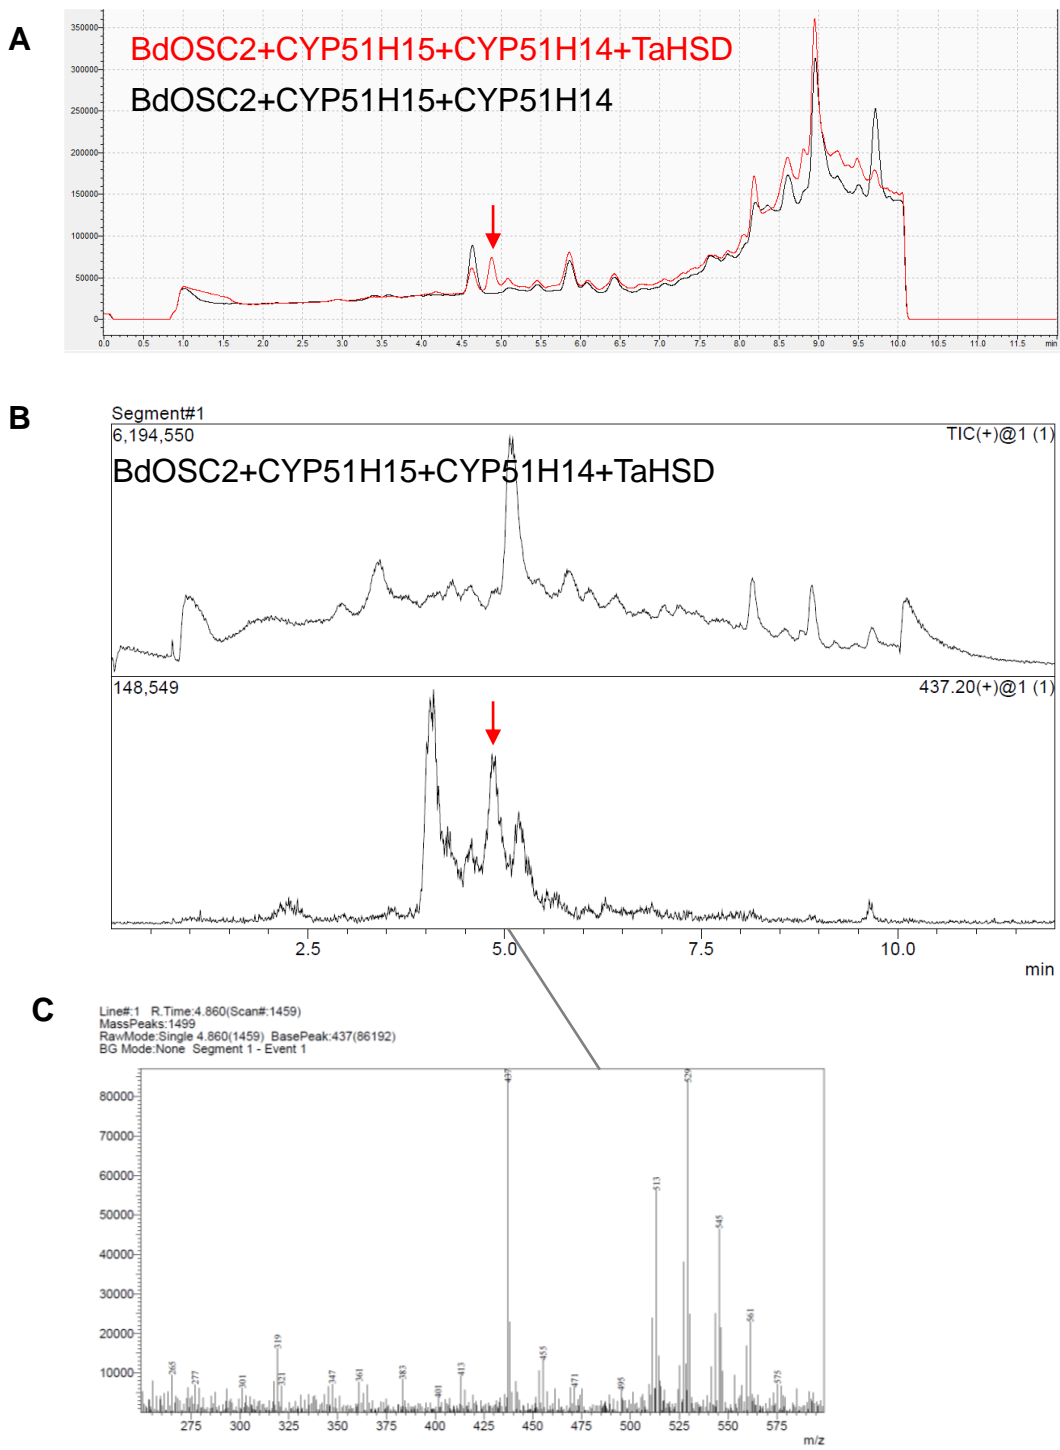

**Fig. S33. LC-MS detection of 7,9,28-trihydroxy-isoarborinone molecular ion.** (A) CAD chromatogram. (B) MS chromatogram- TIC and EIC of 437.2. (C) mass spectra at peak retention time.

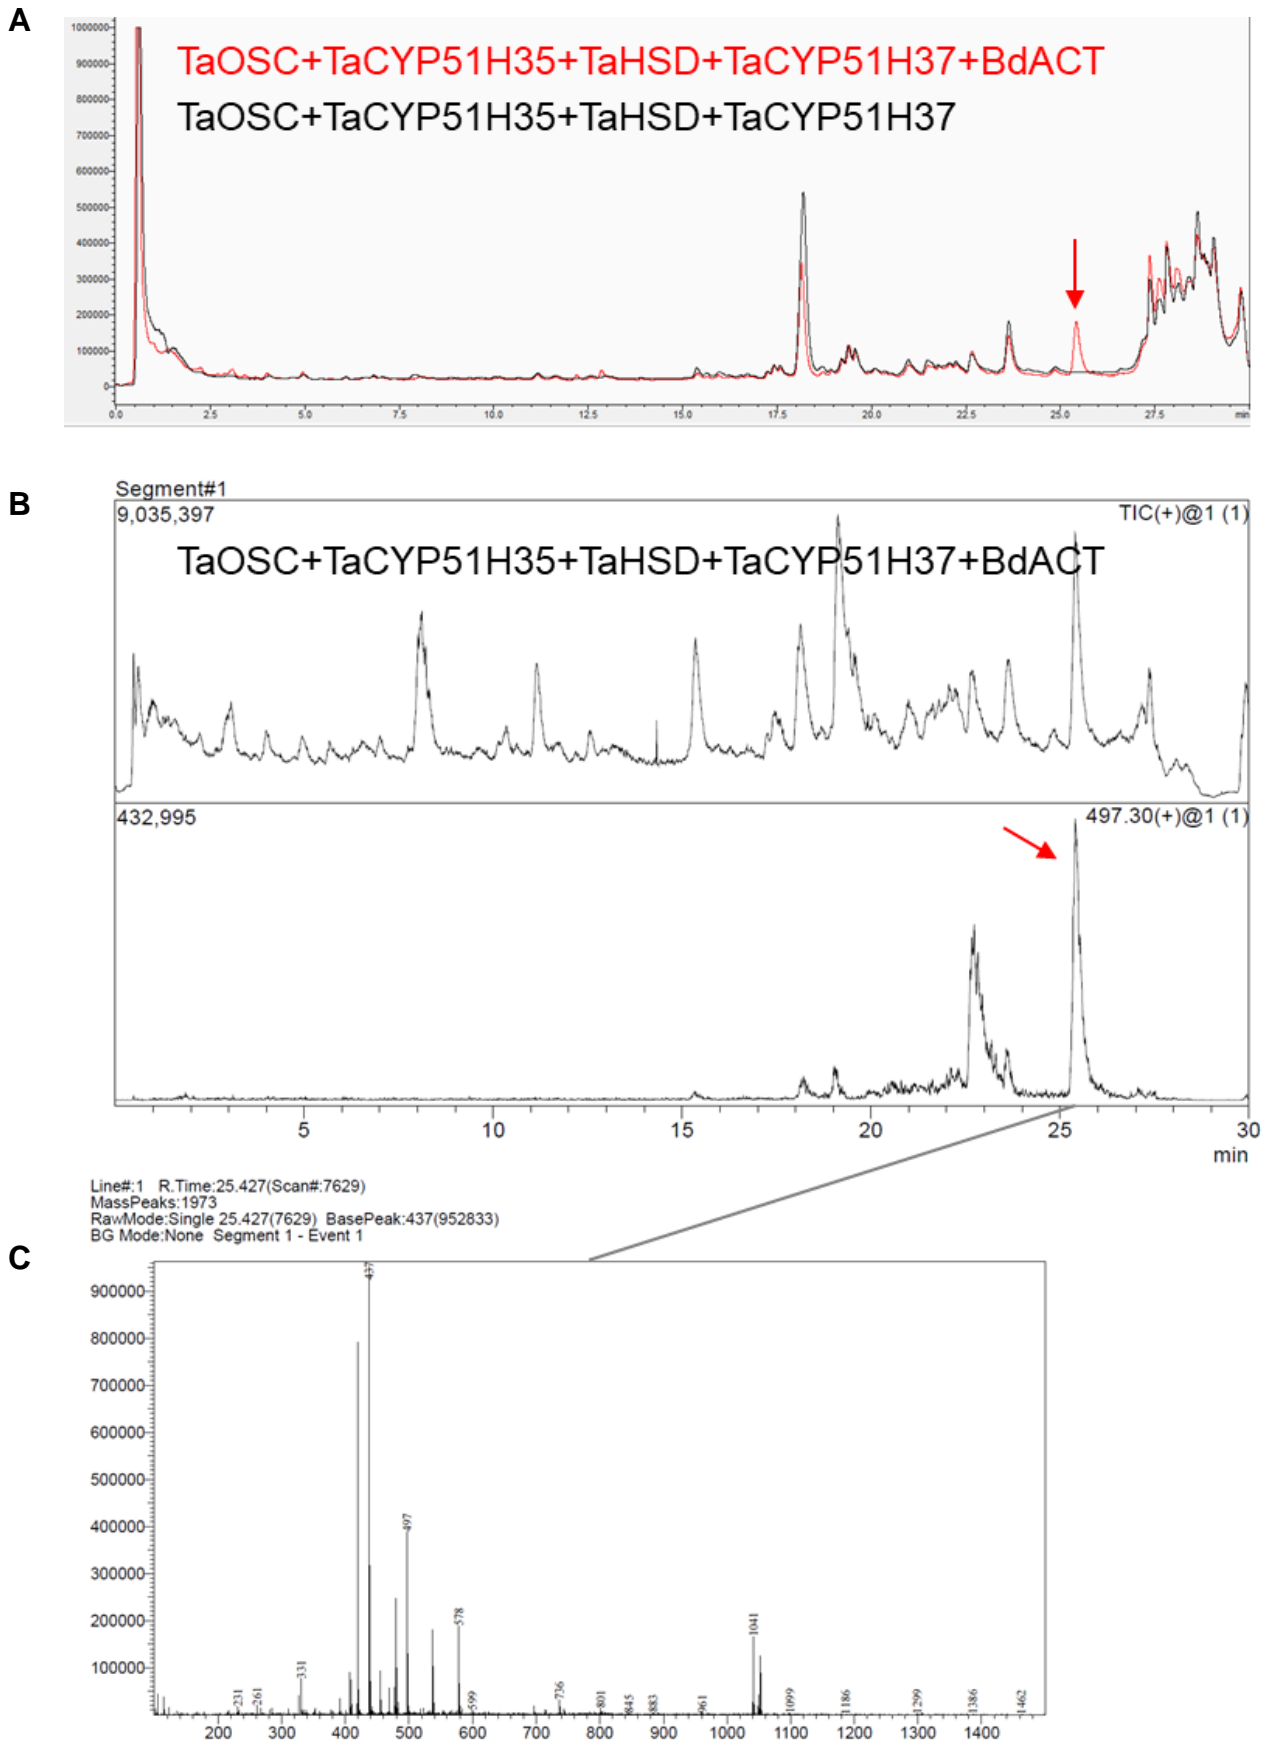

**Fig. S34. LC-MS detection of acetyl-ellarinacin molecular ion.** (A) CAD chromatogram. (B) MS chromatogram- TIC and EIC of 497.3. (C) mass spectra at peak retention time.

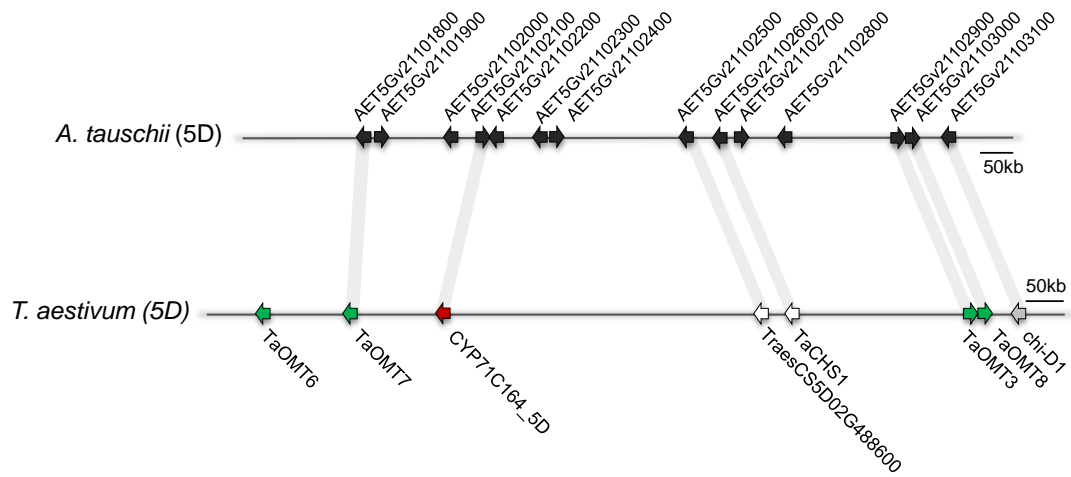

**Fig. S35. Wheat flavonoid producing cluster, BGC 4(5D), is conserved in the *Aegilops tauschii* genome (Aet v4.0).** Grey lines denote orthologous genes, as assigned by Ensembl Plants (<http://www.plants.ensembl.org>). Genomic location of the *TaOMT6* *A. tauschii* ortholog, *AET0Gv20112500*, is unassigned.

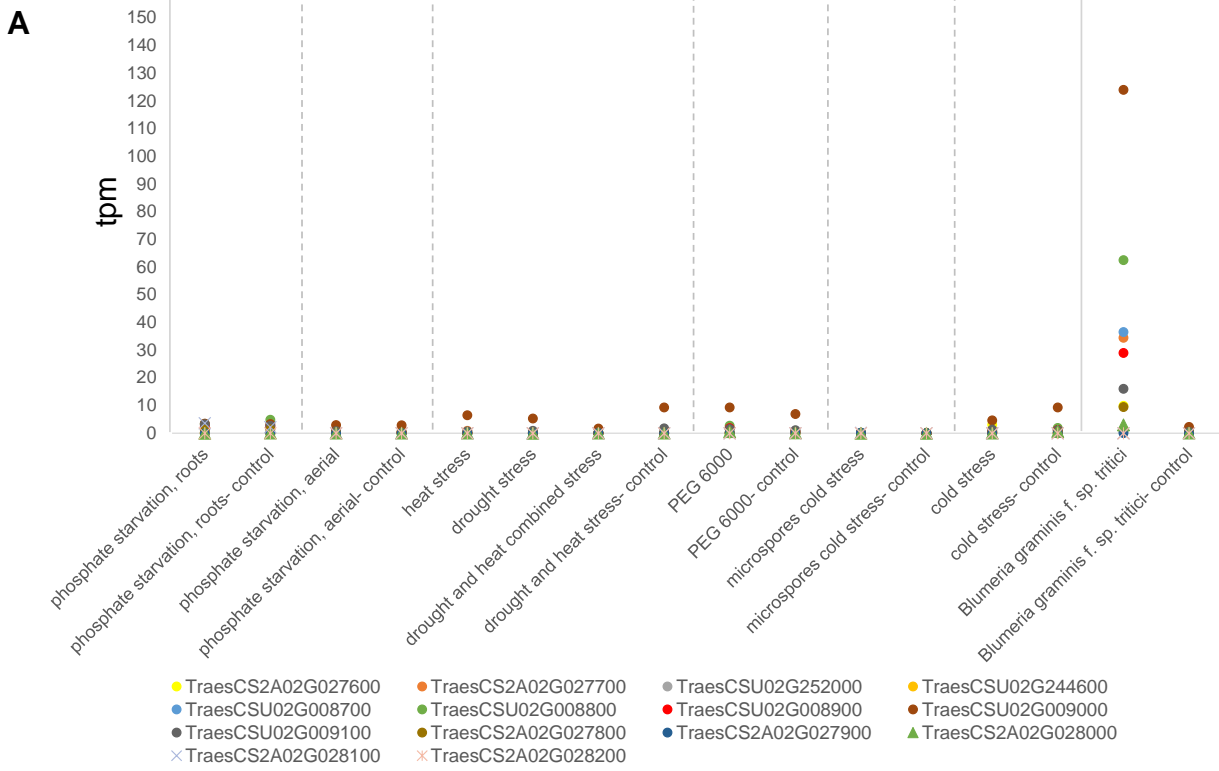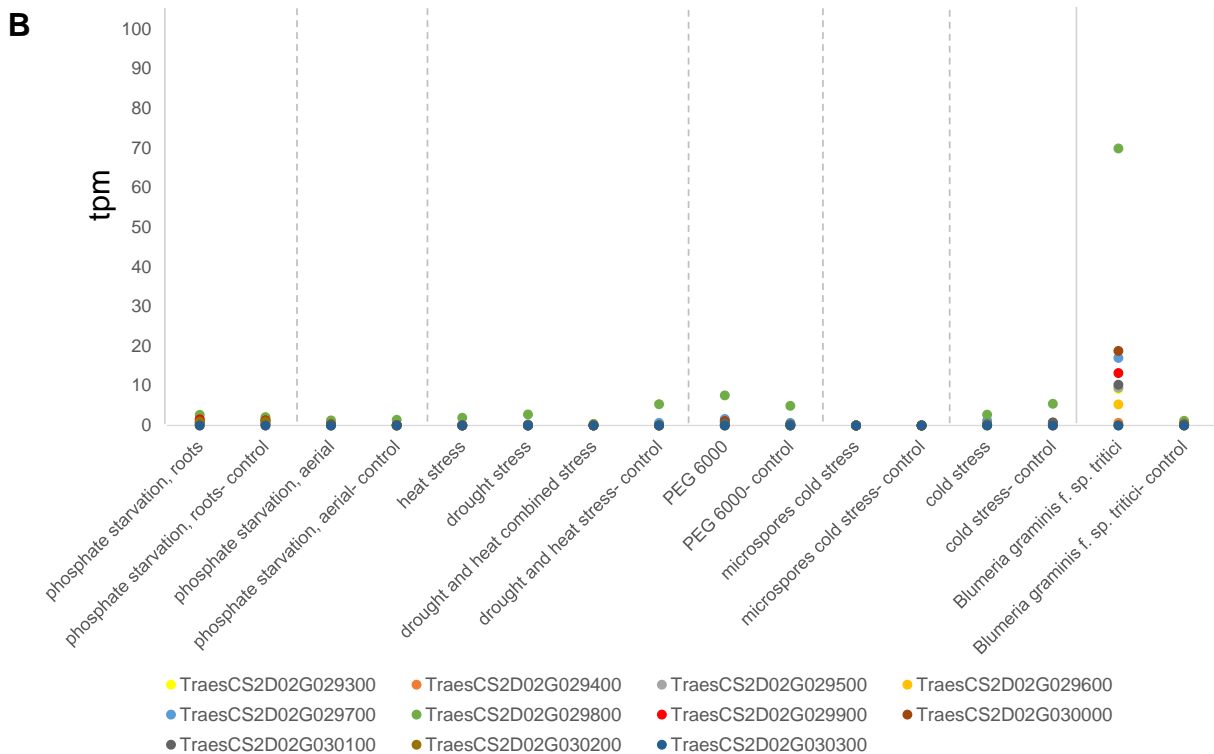

**Fig. S36. Expression of wheat diterpene BGCs 1(2A/2D) under abiotic stress.** (A) Genes in Chr.2A cluster. (B) Genes in Chr.2D cluster. Expression data extracted from <http://www.wheat-expression.com> includes studies applying phosphate starvation (41), heat and drought stress (42), PEG 6000, microspores cold stress (43) and cold stress (44). Data of powdery mildew infection experiment (*Blumeria graminis f. sp. tritici*) (39) is shown for comparison. tpm, transcripts per million. See Table S1 for functional annotations of gene IDs.

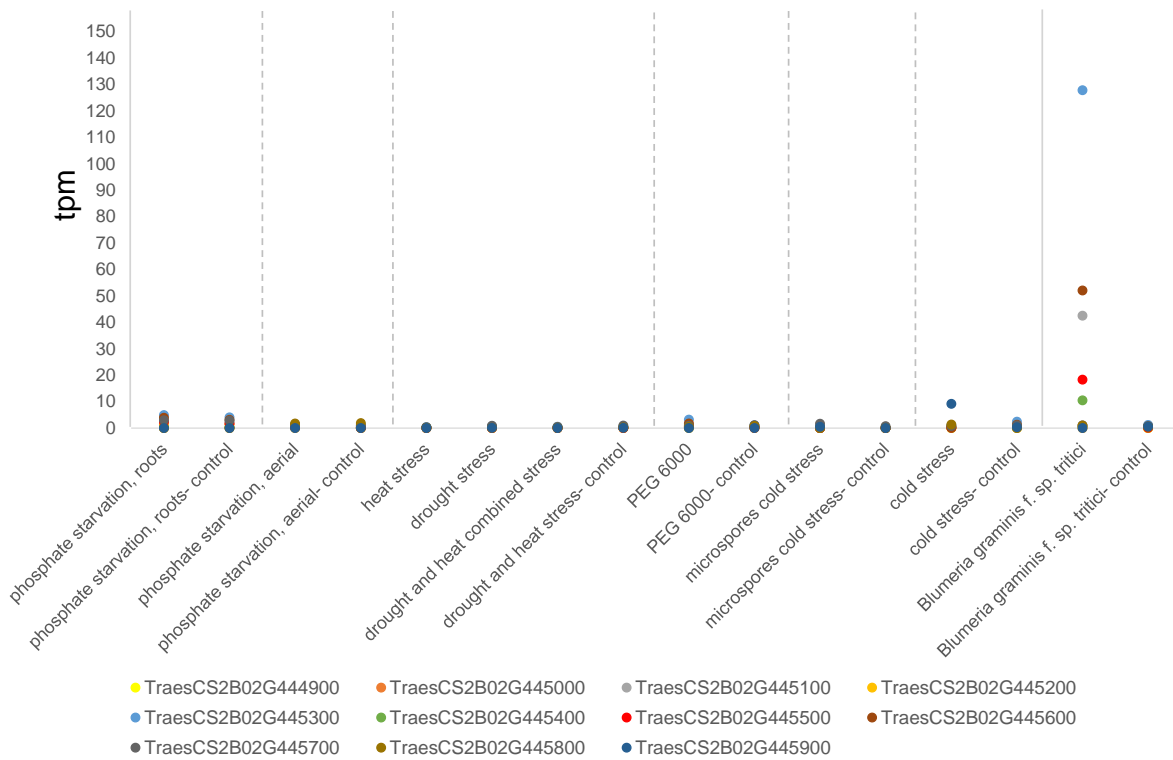

**Fig. S37. Expression of wheat diterpene BGC 2(2B) under abiotic stress.** Expression data extracted from <http://www.wheat-expression.com> includes studies applying phosphate starvation (41), heat and drought stress (42), PEG 6000, microspores cold stress (43) and cold stress (44). Data of powdery mildew infection experiment (*Blumeria graminis f. sp. tritici*) (39) is shown for comparison. tpm, transcripts per million. See Table S1 for functional annotations of gene IDs.



## SI Tables

**Table S1.** Genes comprising six wheat BGCs, and the co-expression network modules to which they belong. In bold: genes that are co-expressed ( $r\text{-val}>0.7$ ) with bait genes (asterisked)

| BGC no.            | Gene ID                   | Gene annotation                               | Gene name in this study      | Co-expression network module |
|--------------------|---------------------------|-----------------------------------------------|------------------------------|------------------------------|
| 1(2A)              | TraesCS2A02G027600        | Kaurene synthase                              |                              | 8                            |
|                    | TraesCS2A02G027700        | Cytochrome P450                               |                              | 8                            |
|                    | TraesCSU02G252000         | Copalyl diphosphate synthase                  |                              | 34                           |
|                    | TraesCSU02G244600         | Copalyl diphosphate synthase                  |                              | 34                           |
|                    | TraesCSU02G244600         | Copalyl diphosphate synthase                  |                              | 34                           |
|                    | <b>TraesCSU02G008700</b>  | <b>Kaurene synthase*</b>                      | <b>TaKSL1</b>                | <b>25</b>                    |
|                    | <b>TraesCSU02G008800</b>  | <b>Cytochrome P450</b>                        |                              | <b>25</b>                    |
|                    | <b>TraesCSU02G008900</b>  | <b>Cytochrome P450</b>                        |                              | <b>25</b>                    |
|                    | <b>TraesCSU02G009000</b>  | <b>Glycosyltransferase</b>                    |                              | <b>12</b>                    |
|                    | <b>TraesCSU02G009100</b>  | <b>Cytochrome P450</b>                        |                              | <b>25</b>                    |
|                    | <b>TraesCS2A02G027800</b> | <b>Copalyl diphosphate synthase</b>           | <b>TaCPS2</b>                | <b>25</b>                    |
|                    | TraesCS2A02G027900        | RING/FYVE/PHD zinc finger superfamily protein |                              | N/A                          |
|                    | <b>TraesCS2A02G028000</b> | <b>Glycosyltransferase</b>                    |                              | <b>25</b>                    |
|                    | TraesCS2A02G028100        | Kaurene synthase                              |                              | N/A                          |
|                    | TraesCS2A02G028200        | Copalyl diphosphate synthase                  |                              | N/A                          |
| 1(2D)              | TraesCS2D02G029300        | Cytochrome P450                               |                              | 8                            |
|                    | TraesCS2D02G029400        | Kaurene synthase                              |                              | 34                           |
|                    | TraesCS2D02G029500        | Cytochrome P450                               |                              | 34                           |
|                    | <b>TraesCS2D02G029600</b> | <b>Copalyl diphosphate synthase</b>           | <b>TaCPS-D2</b>              | <b>25</b>                    |
|                    | <b>TraesCS2D02G029700</b> | <b>Cytochrome P450</b>                        |                              | <b>12</b>                    |
|                    | <b>TraesCS2D02G029800</b> | <b>Glycosyltransferase</b>                    |                              | <b>25</b>                    |
|                    | <b>TraesCS2D02G029900</b> | <b>Cytochrome P450</b>                        |                              | <b>25</b>                    |
|                    | <b>TraesCS2D02G030000</b> | <b>Cytochrome P450</b>                        |                              | <b>25</b>                    |
|                    | <b>TraesCS2D02G030100</b> | <b>Kaurene synthase*</b>                      | <b>TaKSL-D1</b>              | <b>25</b>                    |
|                    | TraesCS2D02G030200        | Kaurene synthase                              | TaKSL4                       | N/A                          |
|                    | TraesCS2D02G030300        | Copalyl diphosphate synthase                  |                              | N/A                          |
| 2(2B)              | TraesCS2B02G444900        | Kaurene synthase                              |                              | N/A                          |
|                    | TraesCS2B02G445000        | Cytochrome P450                               |                              | N/A                          |
|                    | <b>TraesCS2B02G445100</b> | <b>Kaurene synthase</b>                       | <b>TaKSL3</b>                | <b>25</b>                    |
|                    | <b>TraesCS2B02G445200</b> | <b>Kaurene synthase*</b>                      | <b>TaKSL2</b>                | <b>25</b>                    |
|                    | <b>TraesCS2B02G445300</b> | <b>Cytochrome P450</b>                        |                              | <b>25</b>                    |
|                    | TraesCS2B02G445400        | Cytochrome P450                               |                              | 0                            |
|                    | <b>TraesCS2B02G445500</b> | <b>Ent-copalyl diphosphate synthase</b>       | <b>TaCPS1</b>                | <b>25</b>                    |
|                    | <b>TraesCS2B02G445600</b> | <b>Cytochrome P450</b>                        |                              | <b>25</b>                    |
|                    | TraesCS2B02G445700        | Ent-kaurene synthase                          |                              | 0                            |
|                    | TraesCS2B02G445800        | Kaurene synthase                              |                              | N/A                          |
| TraesCS2B02G445900 | Kaurene synthase          |                                               | N/A                          |                              |
| 3(5A)              | <b>TraesCS5A02G004500</b> | <b>Cytochrome P450-like protein</b>           | <b>TaCYP51H35_5A</b>         | <b>34</b>                    |
|                    | <b>TraesCS5A02G004600</b> | <b>Cytochrome P450-like protein</b>           | <b>TaCYP51H13_5A</b>         | <b>25</b>                    |
|                    | <b>TraesCS5A02G004700</b> | <b>Cytochrome P450-like protein</b>           | <b>TaCYP51H37_5A</b>         | <b>25</b>                    |
|                    | <b>TraesCS5A02G004800</b> | <b>Hydroxysteroid dehydrogenase, putative</b> | <b>TaHSD_5A</b>              | <b>25</b>                    |
|                    | <b>TraesCS5A02G004900</b> | <b>Terpene cyclase/mutase family member*</b>  | <b>TaOSC_5A</b>              | <b>25</b>                    |
| 3(5D)              | <b>TraesCS5D02G011800</b> | <b>Terpene cyclase/mutase family member*</b>  | <b>TaOSC (TaIAS)</b>         | <b>25</b>                    |
|                    | <b>TraesCS5D02G011900</b> | <b>Hydroxysteroid dehydrogenase, putative</b> | <b>TaHSD (TaHID)</b>         | <b>25</b>                    |
|                    | <b>TraesCS5D02G012000</b> | <b>Cytochrome P450-like protein</b>           | <b>TaCYP51H37_5D (TaHIO)</b> | <b>25</b>                    |
|                    | <b>TraesCS5D02G012100</b> | <b>Cytochrome P450-like protein</b>           | <b>TaCYP51H13P_5D</b>        | <b>25</b>                    |
|                    | <b>TraesCS5D02G012200</b> | <b>Obtusifolliol 14-alpha demethylase</b>     | <b>TaCYP51H13P_5D</b>        | <b>25</b>                    |
|                    | <b>TraesCS5D02G012300</b> | <b>Cytochrome P450-like protein</b>           | <b>TaCYP51H35_5D (TaIAH)</b> | <b>34</b>                    |
| 4(5D)              | <b>TraesCS5D02G488300</b> | <b>O-methyltransferase-like protein</b>       | <b>TaOMT6</b>                | <b>25</b>                    |
|                    | <b>TraesCS5D02G488400</b> | <b>O-methyltransferase-like protein</b>       | <b>TaOMT7</b>                | <b>25</b>                    |
|                    | <b>TraesCS5D02G488500</b> | <b>Cytochrome P450</b>                        | <b>TaCYP71C164_5D</b>        | <b>25</b>                    |
|                    | TraesCS5D02G488600        | Chalcone synthase                             |                              | 0                            |
|                    | <b>TraesCS5D02G488700</b> | <b>Chalcone synthase*</b>                     | <b>TaCHS1</b>                | <b>25</b>                    |
|                    | <b>TraesCS5D02G488800</b> | <b>O-methyltransferase</b>                    | <b>TaOMT3</b>                | <b>25</b>                    |
|                    | <b>TraesCS5D02G488900</b> | <b>O-methyltransferase</b>                    | <b>TaOMT8</b>                | <b>25</b>                    |
|                    | TraesCS5D02G489000        | Chalcone-flavanone isomerase family protein   | chi-D1                       | 10                           |

**Table S2.** Genomic location of benzoxazinoid biosynthetic genes in the wheat genome

| Chromosomal arm location | Gene name | GenBank accession | Gene ID            | Gene annotation                 | Genomic position                |
|--------------------------|-----------|-------------------|--------------------|---------------------------------|---------------------------------|
| 2BL                      | Taglu1b   | AB236422*         | TraesCS2B02G599800 | Beta-glucosidase                | Chr.2B: 782,533,511-782,538,118 |
|                          | Taglu1a   | AB100035*         | TraesCS2B02G600200 | Beta-glucosidase                | Chr.2B: 783,226,574-783,231,181 |
| 2DL                      | Taglu1c   | AB236423*         | TraesCS2D02G594400 | Beta-glucosidase                | Chr.2D: 648,238,204-648,242,750 |
| 4AS                      | TaBx1A    | AB094060†         | TraesCS4A02G097400 | Tryptophan synthase alpha chain | Chr.4A: 108,369,445-108,371,437 |
|                          | TaBx2A    | AB042630†         | TraesCS4A02G097500 | Cytochrome P450                 | Chr.4A: 108,373,749-108,375,763 |
| 4BL                      | TaBx2B    | AB042631†         | TraesCS4B02G207000 | Cytochrome P450                 | Chr.4B: 440,921,340-440,923,458 |
|                          | TaBx1B    | AB124849†         | TraesCS4B02G207100 | Tryptophan synthase alpha chain | Chr.4B: 440,925,239-440,927,352 |
| 4DL                      | TaBx2D    | AB124851†         | TraesCS4D02G207800 | Cytochrome P450                 | Chr.4D: 357,525,599-357,527,592 |
|                          | TaBx1D    | AB124850†         | TraesCS4D02G207900 | Tryptophan synthase alpha chain | Chr.4D: 357,529,483-357,531,474 |
| 5AS                      | TaBx5A    | AB042629†         | TraesCS5A02G008700 | Cytochrome P450                 | Chr.5A: 6,287,359-6,290,472     |
|                          | TaBx4A    | AB124854†         | TraesCS5A02G008800 | Cytochrome P450                 | Chr.5A: 6,411,078-6,413,189     |
|                          | TaBx3A    | AB042628†         | TraesCS5A02G008900 | Cytochrome P450                 | Chr.5A: 6,422,019-6,424,272     |
| 5BS                      | TaBx5B    | AB124856†         | TraesCS5B02G007000 | Cytochrome P450                 | Chr.5B: 8,185,879-8,188,188     |
|                          | TaBx4B    | AB124855†         | TraesCS5B02G007100 | Cytochrome P450                 | Chr.5B: 8,342,582-8,344,606     |
|                          | TaBx3B    | AB124853†         | TraesCS5B02G007200 | Cytochrome P450                 | Chr.5B: 8,351,751-8,353,860     |
| 5DS                      | TaBx5D    | AB124857†         | TraesCS5D02G014100 | Cytochrome P450                 | Chr.5D: 7,964,211-7,966,925     |
|                          | TaBx4D    | AB042627†         | TraesCS5D02G014200 | Cytochrome P450                 | Chr.5D: 8,020,016-8,022,015     |
|                          | TaBx3D    | AB124852†         | TraesCS5D02G014300 | Cytochrome P450                 | Chr.5D: 8,033,202-8,035,560     |
| 7BS                      | TaGTb     | AB547238*         | TraesCS7B02G016800 | UDP-glycosyltransferase         | Chr.7B: 14,726,749-14,728,414   |
| 7DL                      | TaGTd     | AB547240*         | TraesCS7D02G116700 | UDP-glycosyltransferase         | Chr.7D: 71,837,050-71,839,162   |
| Unassigned               | Taglu1d   | AB548284*         | TraesCSU02G036600  | Beta-glucosidase, putative      | Chr.Un: 31,204,475-31,209,405   |
|                          | TaGTc     | AB547239*         | TraesCSU02G093300  | UDP-glycosyltransferase         | Chr.Un: 82,568,510-82,570,472   |
|                          | TaGTa     | AB547237*         | TraesCSU02G095600  | UDP-glycosyltransferase         | Chr.Un: 84,308,887-84,310,663   |

\*Reference for GenBank accession number: (16)

†Reference for GenBank accession number: (45)

**Table S3.** Gene expression values of 3-5A and 3-5D cluster paralogs

| <b>Gene accession</b> | <b>Annotation</b>                      | <b>Average expression (tpm)</b> | <b>Max expression (tpm)</b> |
|-----------------------|----------------------------------------|---------------------------------|-----------------------------|
| TraesCS5D02G006200    | Cytochrome P450-like protein           | 0.112±0.035                     | 8.896                       |
| TraesCS5D02G006300    | Hydroxysteroid dehydrogenase, putative | 0.009±0.003                     | 0.792                       |
| TraesCS5D02G006400    | Cytochrome P450-like protein           | 0±0                             | 0.018                       |
| TraesCS5D02G006500    | Cytochrome P450-like protein           | 0.018±0.004                     | 0.963                       |
| TraesCS5D02G006600    | Terpene cyclase/mutase family member   | 0.009±0.004                     | 1.257                       |
| TraesCS5D02G006700    | Terpene cyclase/mutase family member   | 0.011±0.003                     | 0.566                       |
| TraesCS5A02G005600    | Cytochrome P450-like protein           | 0.006±0.001                     | 0.186                       |
| TraesCS5A02G005900    | Terpene cyclase/mutase family member   | 0.025±0.01                      | 2.936                       |
| TraesCS5A02G006000    | Cytochrome P450-like protein           | 0.0075±0.003                    | 0.897                       |
| TraesCS5B01G004500    | Cytochrome P450-like protein           | 0.148±0.031                     | 5.928                       |
| TraesCS5B01G004800    | Terpene cyclase/mutase family member   | 0.005±0.001                     | 0.213                       |
| TraesCS5B01G004900    | Cytochrome P450-like protein           | 0.669±0.2334                    | 61.012                      |
| TraesCS5B01G004600    | Cytochrome P450-like protein           | 0.250±0.0779                    | 24.462                      |

Average and maximal normalized gene expression values of TaOSC, TaHSD and TaCYP51H35/37 paralogs, across 379 datapoints in <http://www.wheat-expression.com> transcriptomes dataset. tpm, transcripts per million.

**Table S4.**  $^{13}\text{C}$   $\delta$  of **19-hydroxy-isoarborinol** in this work [100 MHz] compared to the literature (**rubiaronol K**) [125 MHz]. **Pyridine-d<sub>5</sub>** [referenced to the most downfield peak reported in the literature] (33).

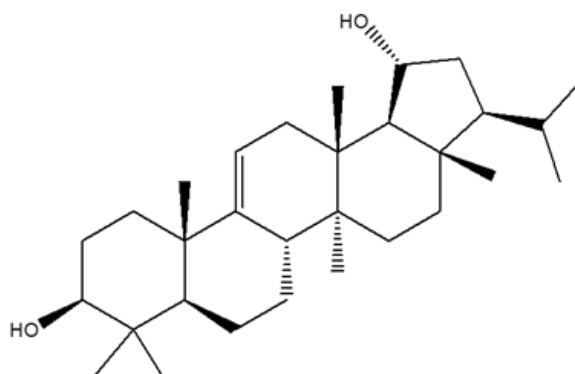

| $^{13}\text{C}$ $\delta$ This work | $^{13}\text{C}$ $\delta$ Lit | $\Delta$ ( $^{13}\text{C}$ $\delta$ This work - Lit) |
|------------------------------------|------------------------------|------------------------------------------------------|
| 148.8                              | 148.8                        | 0.0                                                  |
| 114.9                              | 114.9                        | 0.0                                                  |
| 78.1                               | 78.1                         | 0.0                                                  |
| 70.1                               | 70.2                         | -0.1                                                 |
| 59.0                               | 59.0                         | 0.0                                                  |
| 57.7                               | 57.8                         | -0.1                                                 |
| 52.9                               | 52.9                         | 0.0                                                  |
| 44.0                               | 44.1                         | -0.1                                                 |
| 41.9                               | 42.0                         | -0.1                                                 |
| 41.1                               | 41.1                         | 0.0                                                  |
| 39.9                               | 40.0                         | -0.1                                                 |
| 39.7                               | 39.8                         | -0.1                                                 |
| 38.4                               | 38.5                         | -0.1                                                 |
| 37.6                               | 37.6                         | 0.0                                                  |
| 37.2                               | 37.2                         | 0.0                                                  |
| 36.6                               | 36.6                         | 0.0                                                  |
| 36.5                               | 36.6                         | -0.1                                                 |
| 30.7                               | 30.8                         | -0.1                                                 |
| 29.9                               | 29.9                         | 0.0                                                  |
| 28.9                               | 29.0                         | -0.1                                                 |
| 28.7                               | 28.7                         | 0.0                                                  |
| 27.1                               | 27.2                         | -0.1                                                 |
| 23.2                               | 23.2                         | 0.0                                                  |
| 22.4                               | 22.5                         | -0.1                                                 |
| 22.2                               | 22.3                         | -0.1                                                 |
| 21.9                               | 21.9                         | 0.0                                                  |
| 17.5                               | 17.6                         | -0.1                                                 |
| 16.8                               | 16.8                         | 0.0                                                  |
| 16.6                               | 16.6                         | 0.0                                                  |
| 15.9                               | 15.9                         | 0.0                                                  |

**Table S5.**  $^{13}\text{C}$  &  $^1\text{H}$   $\delta$  assignments for **ellarinacin**. **Pyridine-d5** [referenced to residual solvent peak ( $^1\text{H}$   $\delta$ : 8.74) ( $^{13}\text{C}$   $\delta$ : 150.3)]. Assignments were made via a combination of  $^1\text{H}$ ,  $^{13}\text{C}$ , DEPT-edited HSQC, HMBC, COSY and 2D NOESY experiments. Where signals overlap  $^1\text{H}$   $\delta$  is reported as the centre of the respective HSQC crosspeak. C3-C2 epoxide was assigned as beta due to an NOE observed between C2-H and C5-H.

| Carbon numbering scheme and selected COSY, HMBC and NOESY                          |                                       |                                                            |          |                                       |                                    |
|------------------------------------------------------------------------------------|---------------------------------------|------------------------------------------------------------|----------|---------------------------------------|------------------------------------|
| 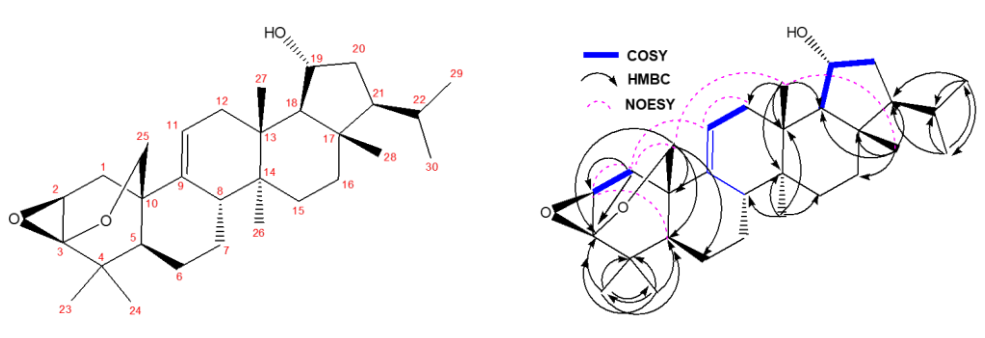 |                                       |                                                            |          |                                       |                                    |
| Carbon #                                                                           | $^{13}\text{C}$ $\delta$<br>(100 MHz) | $^1\text{H}$ $\delta$<br>(400 MHz)                         | Carbon # | $^{13}\text{C}$ $\delta$<br>(100 MHz) | $^1\text{H}$ $\delta$<br>(400 MHz) |
| 9                                                                                  | 139.69                                | /                                                          | 13       | 38.37                                 | /                                  |
| 11                                                                                 | 123.34                                | 5.69 (1H, m)                                               | 12       | 38.34                                 | 2.47 (2H, m)                       |
| 3                                                                                  | 98.76                                 | /                                                          | 16       | 37.50                                 | 1.67 (2H, m)                       |
| 25                                                                                 | 72.56                                 | 4.51 (1H, dd $J=8.5, 3.1$ )<br>3.65 (1H, dd $J=8.5, 1.0$ ) | 1        | 37.08                                 | 2.33 (1H, m)<br>2.21 (1H, m)       |
| 2                                                                                  | 72.21                                 | 3.92 (1H, td $J=10.7, 3.1$ )                               | 15       | 32.11                                 | 2.98 (1H, m)<br>1.86 (1H, m)       |
| 19                                                                                 | 70.69                                 | 4.50 (1H, m)                                               | 6        | 31.83                                 | 2.31 (1H, m)<br>1.50 (1H, m)       |
| 18                                                                                 | 59.45                                 | 2.04 (1H, m)                                               | 22       | 31.13                                 | 1.41 (1H, m)                       |
| 21                                                                                 | 58.21                                 | 1.39 (1H, m)                                               | 7        | 30.87                                 | 2.40 (1H, m)<br>2.18 (1H, m)       |
| 8                                                                                  | 50.62                                 | 2.22 (1H, m)                                               | 24       | 28.67                                 | 1.26 (3H, s)                       |
| 5                                                                                  | 48.05                                 | 1.63 (1H, m)                                               | 29       | 23.61                                 | 0.86 (3H, d $J=5.9$ )              |
| 17                                                                                 | 44.15                                 | /                                                          | 30       | 22.57                                 | 0.90 (3H, d $J=5.9$ )              |
| 20                                                                                 | 42.31                                 | 2.07 (1H, m)<br>1.97 (1H, m)                               | 23       | 19.93                                 | 1.40 (3H, s)                       |
| 4                                                                                  | 40.44                                 | /                                                          | 27       | 17.21                                 | 1.10 (3H, s)                       |
| 14                                                                                 | 40.29                                 | /                                                          | 26       | 16.45                                 | 1.31 (3H, s)                       |
| 10                                                                                 | 39.00                                 | /                                                          | 28       | 16.39                                 | 0.90 (3H, s)                       |

**Table S6.** Pairwise alignment of putative proteins from orthologous biosynthetic gene clusters in common wheat, *Aegilops tauschii*, and wild emmer wheat.

| <i>T. aestivum</i> (Chr.5D)                                 | <i>A. tauschii</i>                | % identity |
|-------------------------------------------------------------|-----------------------------------|------------|
| TraesCS5D02G011800<br>TaOSC_5D                              | AET5Gv20013100                    | 99.9       |
| TraesCS5D02G011900<br>TaHSD_5D                              | AET5Gv20013000                    | 100        |
| TraesCS5D02G012000<br>TaCYP51H37_5D                         | AET5Gv20012900                    | 100        |
| TraesCS5D02G012100/<br>TraesCS5D02G012200<br>TaCYP51H13P_5D | AET5Gv20012800                    | 99.4       |
| TraesCS5D02G012300<br>TaCYP51H35_5D                         | AET5Gv20012700                    | 99.6       |
| <i>T. aestivum</i> (Chr.5A)                                 | <i>T. turgidum ssp. diccoides</i> | % identity |
| TraesCS5A02G004500<br>TaCYP51H35_5A                         | TRIDC5AG000720                    | 99.6       |
| TraesCS5A02G004600<br>TaCYP51H13_5A                         | TRIDC5AG000730                    | 99.4       |
| TraesCS5A02G004700<br>TaCYP51H37_5A                         | TRIDC5AG000740                    | 100        |
| TraesCS5A02G004800<br>TaHSD_5A                              | TRIDC5AG000750                    | 99.7       |
| TraesCS5A02G004900<br>TaOSC_5A                              | TRIDC5AG000760                    | 99.9       |

**Table S7.** Normalized expression values (RPKM) of *AsOSC1* and *AsCYP51H73* in an RNA-seq dataset sampling six *Avena strigosa* tissues (28). Average and maximum RPKM values of entire dataset are shown.

|            | <b>Leaf</b> | <b>Root tip</b> | <b>Panicle</b> | <b>Root</b> | <b>Shoot</b> | <b>Spikelet</b> |
|------------|-------------|-----------------|----------------|-------------|--------------|-----------------|
| AsOSC1     | 0.00        | 0.00            | 0.30           | 0.00        | 0.00         | 0.01            |
| AsCYP51H73 | 0.00        | 0.00            | 0.00           | 0.00        | 0.00         | 0.00            |
| Avg. RPKM  | 25.94       | 22.46           | 20.48          | 23.02       | 30.79        | 19.40           |
| Max RPKM   | 358635.00   | 452433.07       | 76143.40       | 316116.93   | 530585.92    | 30338.72        |

**Table S8.**  $^{13}\text{C}$  &  $^1\text{H}$   $\delta$  assignments for **brachynacin**. **Pyridine-d5** [referenced to residual solvent peak ( $^1\text{H}$   $\delta$ : 8.74) ( $^{13}\text{C}$   $\delta$ : 150.3)]. Assignments were made via a combination of  $^1\text{H}$ ,  $^{13}\text{C}$ , DEPT-edited HSQC, HMBC, COSY, TOCSY and 2D ROESY experiments. Where signals overlap  $^1\text{H}$   $\delta$  is reported as the centre of the respective HSQC crosspeak. C1-OAc was assigned as beta due to NOEs observed between C1-H and C3-H, and C5-H. C7-OH was assigned as beta due to NOEs observed between C7-H and C26-H<sub>3</sub> and C5-H.

| Carbon numbering scheme and selected COSY, HMBC and TOCSY                                                                                                                                               |                                       |                                                                  |                                                                                    |                                       |                                    |
|---------------------------------------------------------------------------------------------------------------------------------------------------------------------------------------------------------|---------------------------------------|------------------------------------------------------------------|------------------------------------------------------------------------------------|---------------------------------------|------------------------------------|
| 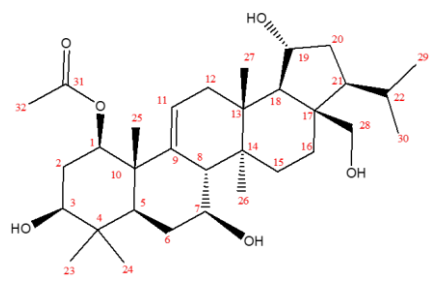                                                                                                                       |                                       |                                                                  |  |                                       |                                    |
| Carbon #                                                                                                                                                                                                | $^{13}\text{C}$ $\delta$<br>(150 MHz) | $^1\text{H}$ $\delta$<br>(600 MHz)                               | Carbon #                                                                           | $^{13}\text{C}$ $\delta$<br>(150 MHz) | $^1\text{H}$ $\delta$<br>(600 MHz) |
| 31                                                                                                                                                                                                      | 170.84                                | /                                                                | 4                                                                                  | 40.09                                 | /                                  |
| 9                                                                                                                                                                                                       | 143.87                                | /                                                                | 13                                                                                 | 38.66                                 | /                                  |
| 11                                                                                                                                                                                                      | 118.92                                | 5.49 (1H, m)                                                     | 12                                                                                 | 38.47                                 | 2.62 (2H, m)                       |
| 1                                                                                                                                                                                                       | 76.75                                 | 5.37 (1H, dd $J = 11.5, 4.3$ )                                   | 2                                                                                  | 34.67                                 | 2.52 (1H, m)<br>2.16 (1H, m)       |
| 3                                                                                                                                                                                                       | 74.75                                 | 3.67 (1H, m)                                                     | 6                                                                                  | 33.56                                 | 2.33 (1H, m)<br>2.18 (1H, m)       |
| 7                                                                                                                                                                                                       | 72.26                                 | 4.09 (1H, m)                                                     | 15                                                                                 | 33.50                                 | 2.03 (1H, m)<br>1.64 (1H, m)       |
| 19                                                                                                                                                                                                      | 71.07                                 | 5.11 (1H, m)                                                     | 16                                                                                 | 33.43                                 | 2.88 (1H, m)<br>2.03 (1H, m)       |
| 28                                                                                                                                                                                                      | 63.38                                 | 4.26 (1H, dd $J = 11.1, 4.2$ )<br>4.12 (1H, dd $J = 11.1, 4.2$ ) | 22                                                                                 | 31.18                                 | 2.17 (1H, m)                       |
| 18                                                                                                                                                                                                      | 60.50                                 | 2.40 (1H, d $J = 9.9$ )                                          | 23                                                                                 | 28.56                                 | 1.22 (3H, s)                       |
| 21                                                                                                                                                                                                      | 58.50                                 | 1.61 (1H, m)                                                     | 30                                                                                 | 24.03                                 | 0.99 (3H, d $J = 6.5$ )            |
| 8                                                                                                                                                                                                       | 49.47                                 | 2.50 (1H, m)                                                     | 29                                                                                 | 23.81                                 | 1.11 (3H, d $J = 6.5$ )            |
| 17                                                                                                                                                                                                      | 49.38                                 | /                                                                | 32                                                                                 | 21.59                                 | 1.96 (3H, s)                       |
| 5                                                                                                                                                                                                       | 48.00                                 | 1.20 (1H, m)                                                     | 26                                                                                 | 17.67                                 | 1.34 (3H, s)                       |
| 10                                                                                                                                                                                                      | 45.51                                 | /                                                                | 27                                                                                 | 16.99                                 | 1.53 (3H, s)                       |
| 20                                                                                                                                                                                                      | 43.80                                 | 2.65 (1H, m)<br>2.19 (1H, m)                                     | 25                                                                                 | 16.84                                 | 1.43 (3H, s)                       |
| 14                                                                                                                                                                                                      | 40.62                                 | /                                                                | 24                                                                                 | 16.29                                 | 1.13 (3H, s)                       |
| <b>Exchangable Protons (Assigned by COSY)</b>                                                                                                                                                           |                                       |                                                                  |                                                                                    |                                       |                                    |
| <b>C3-OH:</b> $\delta$ 6.19 (1H, d, $J = 5.2$ ); <b>C7-OH:</b> $\delta$ 5.75 (1H, d, $J = 6.2$ ); <b>C28-OH:</b> $\delta$ 5.66 (1H, brt, $J = 3.9$ ), <b>C19-OH:</b> $\delta$ 5.42 (1H, d, $J = 5.8$ ). |                                       |                                                                  |                                                                                    |                                       |                                    |



**Table S9.** *B. distachyon* putative terpene cluster homologous to wheat BGC 2(2B)

| Gene ID      | Location                          | Description                            |
|--------------|-----------------------------------|----------------------------------------|
| Bradi5g21383 | Bd5:24179552..24182576 (+ strand) | farnesyl diphosphatase/FPP phosphatase |
| Bradi5g21387 | Bd5:24182863..24188013 (+ strand) | ent-kaurene synthase                   |
| Bradi5g21400 | Bd5:24188931..24190869 (- strand) | cytochrome P450                        |
| Bradi5g21410 | Bd5:24194057..24196081 (- strand) | cytochrome P450                        |
| Bradi5g21420 | Bd5:24200947..24203100 (- strand) | germacrene A alcohol dehydrogenase     |
| Bradi5g21430 | Bd5:24205464..24207731 (- strand) | germacrene A alcohol dehydrogenase     |
| Bradi5g21440 | Bd5:24210985..24218157 (+ strand) | ent-kaurene synthase                   |
| Bradi5g21447 | Bd5:24218971..24221276 (- strand) | cytochrome P450                        |
| Bradi5g21460 | Bd5:24222480..24225443 (- strand) | cytochrome P450                        |
| Bradi5g21465 | Bd5:24227072..24227779 (+ strand) | unknown protein                        |
| Bradi5g21470 | Bd5:24229095..24230866 (- strand) | cytochrome P450                        |
| Bradi5g21480 | Bd5:24238153..24242304 (+ strand) | ent-kaurene synthase                   |
| Bradi5g21488 | Bd5:24244530..24246038 (+ strand) | cytochrome P450                        |
| Bradi5g21492 | Bd5:24246237..24247028 (+ strand) | unknown protein                        |
| Bradi5g21497 | Bd5:24270996..24274843 (+ strand) | ent-kaurene synthase                   |

**Table S10.** Oligonucleotides used in this study

|                                     |                                                                |
|-------------------------------------|----------------------------------------------------------------|
| <b>Full CDS cloning</b>             |                                                                |
| TaCYP51H35_5D F                     | GCGCCGTCGCTCGAATGGACTTAGCAAGTCTC                               |
| TaCYP51H35_5D R                     | GCGCCGTCGCTCGAAGCCTACAAAATGCCATTCTC                            |
| TaCYP51H37_5D F                     | GCGCCGTCGCTCGAATGGAGATGGCAAGTAGCGC                             |
| TaCYP51H37_5D R                     | GCGCCGTCGCTCGAAGCCTAGCCTAGCAGCTGGCGCCTTTGTAG                   |
| TaCYP51H13_5A F                     | GCGCCGTCGCTCGAATGGACTTGACAAAGTCTACTACG                         |
| TaCYP51H13_5A R                     | GCGCCGTCGCTCGAAGCTTAAATTCCATTCTCGTATATCTCA                     |
| A. tauschii IAH F                   | GGGGACAAGTTTGTACAAAAAAGCAGGCTATGGACTTAGCAAGTCTCAC              |
| A. tauschii IAH R                   | GGGGACCACCTTTGTACAAAGAAAGCTGGGTCTAATTAAGTGACTGCAAAAATGC        |
| BdOSC2 F                            | GCGCCGTCGCTCGAATGTGGAAGCTAAAGATCGCA                            |
| BdOSC2 R                            | GCGCCGTCGCTCGAAGCTTATGCCTTTTGTGCTTGCCAG                        |
| BdCYP51H14 F                        | GCGCCGTCGCTCGAATGTTTCATGACAAAGTAGCGCC                          |
| BdCYP51H14 R                        | GCGCCGTCGCTCGAAGCCTAGCCCAACAGCCGATGTC                          |
| BdCYP51H15 F                        | GCGCCGTCGCTCGAATGGACTTGCAAGCACAGC                              |
| BdCYP51H15 R                        | GCGCCGTCGCTCGAAGCCTAAGTGCTAGCACGGCAGC                          |
| BdCYP51H16 F                        | GCGCCGTCGCTCGAATGGAATTTACAAGTGGCGAC                            |
| BdCYP51H16 R                        | GCGCCGTCGCTCGAAGCCTAGGCTGACATCCTCGATC                          |
| TaCYP71C164_5D F                    | GGGGACAAGTTTGTACAAAAAAGCAGGCTATGGAAGATCTCGTGAAGAAACC           |
| TaCYP71C164_5D R                    | GGGGACCACCTTTGTACAAAGAAAGCTGGGTCTACATCCAGGATTTTGAATTAACAATAG   |
| TaCYP71F53_5D F                     | GGGGACAAGTTTGTACAAAAAAGCAGGCTATGGAGGGTTGGTTAACCTTATGTTTC       |
| TaCYP71F53_5D R                     | GGGGACCACCTTTGTACAAAGAAAGCTGGGTCTATATAGTGGAGCGTACATATGGAATAGC  |
| TaOMT6 F                            | GGGGACAAGTTTGTACAAAAAAGCAGGCTATGGCGCCCAAGCAAGCAGAGTTCTCA       |
| TaOMT6 R                            | GGGGACCACCTTTGTACAAAGAAAGCTGGGTTCAGGGTAGAGCTCAATAACAGATCTAACTC |
| TaOMT3 F                            | GGGGACAAGTTTGTACAAAAAAGCAGGCTATGGGTCTCCACTGGCGTGGAGAAGGTC      |
| TaOMT3 R                            | GGGGACCACCTTTGTACAAAGAAAGCTGGGTCTATTTGACGAACTCAATGACCCATGC     |
| TaOMT8 F                            | GGGGACAAGTTTGTACAAAAAAGCAGGCTATGGGTCTATCTCCGACGACGAGGGC        |
| TaOMT8 R                            | GGGGACCACCTTTGTACAAAGAAAGCTGGGTCTATTTGTTCAACTCAATGACCCATATG    |
| <b><i>T. aestivum</i> RT-PCR</b>    |                                                                |
| TaCYP51H35_5D F                     | GGTGGGCTGTGGCTCTT                                              |
| TaCYP51H35_5D R                     | CTACAAAATGCCATTCTCTT                                           |
| TaCYP51H13_5A F                     | ACCAACATTGATCCACAGC                                            |
| TaCYP51H13_5A R                     | TTAAATTCCATTTCTCGTATATCTC                                      |
| TaCYP51H37_5D F                     | CCGCTGCTCCAGCCAGTGA                                            |
| TaCYP51H37_5D R                     | CTAGCCTAGCAGCTGGCGTCTC                                         |
| TaOSC_5D F                          | GGGAGTTCGATCCTGCC                                              |
| TaOSC_5D R                          | CTATCTTCCAAGCGAATGTG                                           |
| TaOSC_5A F                          | TGGAACAACATGGGTATCACATA                                        |
| TaOSC_5A R                          | CAGGGCAGTCCGCACG                                               |
| <b><i>T. aestivum</i> qRT-PCR</b>   |                                                                |
| TaOSC_5D qRT-PCR F                  | GGGACTGCATATCGAGGGAA                                           |
| TaOSC_5D qRT-PCR R                  | CCCCAAGCAATCTCAAAGCA                                           |
| TaHSD qRT-PCR F                     | GCCTACTTCTCTGTGCGACCT                                          |
| TaHSD qRT-PCR R                     | GTTGTTGGTATGATCCGCCG                                           |
| TaCYP51H35_5D qRT-PCR F             | TGGAAGACACATTTGCACCG                                           |
| TaCYP51H35_5D qRT-PCR R             | CGAGCTCAAAGTCTCTCAGC                                           |
| TaCYP51H37_5D qRT-PCR F             | GCTGAACCCACCAACAACAA                                           |
| TaCYP51H37_5D qRT-PCR R             | GTCTTGTCCGCACTGTGAAA                                           |
| TUBB qPCR F                         | CAAGGAGGTGGACGAGCAGATG                                         |
| TUBB qPCR R                         | GACTTGACGTTGTTGGGGATCCA                                        |
| <b><i>B. distachyon</i> RT-PCR</b>  |                                                                |
| BdOSC1 F                            | CATCAGAAGGAGATTCCGAGATA                                        |
| BdOSC1 R                            | CCATCGTCATTCATCAGTGATAA                                        |
| BdOSC2 F                            | CATCAGAAAAGAGATGCGGAGATA                                       |
| BdOSC2 R                            | CCATCCTCGTTCATCAGAGATAAC                                       |
| BdCYP51H14 F                        | ATGCATACTTCAACAAGGATCTAT                                       |
| BdCYP51H14 R                        | CCTTGATGCAACTATGGAGTGTA                                        |
| BdACT F                             | ACAAGAATCACATGTGCATTCC                                         |
| BdACT R                             | GAATCAAGTAGTGCTGGCGT                                           |
| BdCYP51H15 F                        | CTCTTCTTTCATCACTGCTTTAG                                        |
| BdCYP51H15 R                        | TTGACTACAATAGGACTCGCTAC                                        |
| BdCYP51H16 F                        | ATGGAATTTACAAGTGGCGAC                                          |
| BdCYP51H16 R                        | CTGCCAAGGTATTGTAGTCGA                                          |
| BdGAPDH F                           | ATGGGCAAGATTAAGATCGGAA                                         |
| BdGAPDH R                           | TTACTGAGTCTTGGCCATGT                                           |
| <b><i>B. distachyon</i> qRT-PCR</b> |                                                                |
| BdOSC1 F                            | CAGGGGCTGGTGTATTCAA                                            |
| BdOSC1 R                            | GTAATCTGCAGCCTTTCGGA                                           |
| BdOSC2 F                            | CTCCTGAATTGGCTGGTGAG                                           |
| BdOSC2 R                            | GCCATCCTCGTTCATCAGAG                                           |
| BdCYP51H14 F                        | GCTGCTCTGAAAATCGTGA                                            |
| BdCYP51H14 R                        | GGCCGTCTTTGTAAGTTGAA                                           |
| BdACT F                             | AATCACATGTGCATTCCGGT                                           |
| BdACT R                             | GCACCTTTTATCGTCTCGGC                                           |
| BdCYP51H15 F                        | TCCGCTCCTATTGCTGGA                                             |
| BdCYP51H15 R                        | ACATTGGGTGGCTAAGCAAA                                           |
| BdCYP51H16 F                        | CTCCTTGGACTTCTACACGC                                           |
| BdCYP51H16 R                        | CACCTTTTGTCCAAGCAAGC                                           |
| BdGAPDH F                           | TTGCTCTCCAGAGCGATGAC                                           |
| BdGAPDH R                           | CTCCACGACATAATCGGCAC                                           |
| <b>Site-directed mutagenesis</b>    |                                                                |
| TaOSC_5D(I581S) F                   | GTACCCCAAACACAGTCGCTTGGAAAG                                    |
| TaOSC_5D(I581S) R                   | CTCTTCCAAGCGACTGTGTTGGGGTAC                                    |

**Table S11.** Isolera Prime gradient conditions

| <b>Compound</b> | <b>Column</b>       | <b>Solvents</b>               | <b>Gradient</b>                        |
|-----------------|---------------------|-------------------------------|----------------------------------------|
| Ellarinacin     | SNAP Ultra 50 gr    | A: hexane                     | 0-100% B (10 CV)                       |
|                 |                     | B: ethyl acetate              | 100-100% B (1 CV)                      |
|                 | KP- sil 25 gr       | A: hexane<br>B: ethyl acetate | 50-70% B (60 CV)                       |
| Brachynacin     | SNAP Ultra 50 gr    | A: hexane                     | 0-100% B (10 CV)                       |
|                 |                     | B: ethyl acetate              | 100-100% B (1 CV)                      |
|                 | Sfar silica D 30 gr | A: hexane<br>B: ethyl acetate | 10-100% B (43 CV)<br>100-100% B (5 CV) |

**REFERENCES**

1. A. Untergasser *et al.*, Primer3-new capabilities and interfaces. *Nucleic Acids Research* **40** (2012).
2. M. W. Pfaffl, A new mathematical model for relative quantification in real-time RT-PCR. *Nucleic Acids Research* **29** (2001).
3. J. J. Scholtz, B. Visser, Reference gene selection for qPCR gene expression analysis of rust-infected wheat. *Physiological and Molecular Plant Pathology* **81**, 22-25 (2013).
4. R. Makandar, J. S. Essig, M. A. Schapaugh, H. N. Trick, J. Shah, Genetically engineered resistance to Fusarium head blight in wheat by expression of Arabidopsis NPR1. *Mol Plant Microbe Interact* **19**, 123-129 (2006).
5. J. M. Ruijter *et al.*, Amplification efficiency: linking baseline and bias in the analysis of quantitative PCR data. *Nucleic Acids Research* **37** (2009).
6. R. De La Peña, E. S. Sattely, Rerouting plant terpene biosynthesis enables momilactone pathway elucidation. *Nat Chem Biol* **17**, 205-212 (2021).
7. L. Zheng, U. Baumann, J. L. Reymond, An efficient one-step site-directed and site-saturation mutagenesis protocol. *Nucleic Acids Res* **32**, e115 (2004).
8. C. Roberts *et al.* (1997) A Comprehensive Set of Modular Vectors for Advanced Manipulations and Efficient Transformation of Plants. in *pCAMBIA Vector Release Manual Rockefeller Foundation Meeting of the International Program on Rice Biotechnology, September 15-19, Malacca, Malaysia*.
9. A. Sarrion-Perdigones *et al.*, GoldenBraid 2.0: A Comprehensive DNA Assembly Framework for Plant Synthetic Biology. *Plant Physiology* **162**, 1618-1631 (2013).

10. T. Dahan-Meir *et al.*, Efficient in planta gene targeting in tomato using geminiviral replicons and the CRISPR/Cas9 system. *Plant Journal* **95**, 5-16 (2018).
11. F. Sainsbury, E. C. Thuenemann, G. P. Lomonosoff, pEAQ: versatile expression vectors for easy and quick transient expression of heterologous proteins in plants. *Plant Biotechnology Journal* **7**, 682-693 (2009).
12. J. Reed *et al.*, A translational synthetic biology platform for rapid access to gram-scale quantities of novel drug-like molecules. *Metab Eng* **42**, 185-193 (2017).
13. M. J. Stephenson, J. Reed, B. Brouwer, A. Osbourn, Transient Expression in Nicotiana Benthamiana Leaves for Triterpene Production at a Preparative Scale. *Jove-Journal of Visualized Experiments* 10.3791/58169 (2018).
14. R. H. Ramirez-Gonzalez *et al.*, The transcriptional landscape of polyploid wheat. *Science* **361**, 662-+ (2018).
15. P. Shannon *et al.*, Cytoscape: A software environment for integrated models of biomolecular interaction networks. *Genome Research* **13**, 2498-2504 (2003).
16. B. Makowska, B. Bakera, M. Rakoczy-Trojanowska, The genetic background of benzoxazinoid biosynthesis in cereals. *Acta Physiologiae Plantarum* **37** (2015).
17. P. Borrill, R. Ramirez-Gonzalez, C. Uauy, expVIP: a Customizable RNA-seq Data Analysis and Visualization Platform. *Plant Physiology* **170**, 2172-2186 (2016).
18. M. C. Luo *et al.*, Genome sequence of the progenitor of the wheat D genome *Aegilops tauschii*. *Nature* **551**, 498-+ (2017).
19. R. Avni *et al.*, Wild emmer genome architecture and diversity elucidate wheat evolution and domestication. *Science* **357**, 93-97 (2017).
20. R. Appels *et al.*, Shifting the limits in wheat research and breeding using a fully annotated reference genome. *Science* **361** (2018).
21. H. Tang *et al.*, Unraveling ancient hexaploidy through multiply-aligned angiosperm gene maps. *Genome Res* **18**, 1944-1954 (2008).
22. M. Alonge, A. Shumate, D. Puiu, A. V. Zimin, S. L. Salzberg, Chromosome-Scale Assembly of the Bread Wheat Genome Reveals Thousands of Additional Gene Copies. *Genetics* **216**, 599-608 (2020).

23. Y. Kawahara *et al.*, Improvement of the *Oryza sativa* Nipponbare reference genome using next generation sequence and optical map data. *Rice (N Y)* **6**, 4 (2013).
24. P. S. Schnable *et al.*, The B73 Maize Genome: Complexity, Diversity, and Dynamics. *Science* **326**, 1112-1115 (2009).
25. S. Beier *et al.*, Construction of a map-based reference genome sequence for barley, *Hordeum vulgare* L. *Sci Data* **4**, 170044 (2017).
26. J. P. Vogel *et al.*, Genome sequencing and analysis of the model grass *Brachypodium distachyon*. *Nature* **463**, 763-768 (2010).
27. S. Ouyang *et al.*, The TIGR Rice Genome Annotation Resource: Improvements and new features. *Nucleic Acids Research* **35**, D883-D887 (2007).
28. Y. Li *et al.*, Subtelomeric assembly of a multi-gene pathway for antimicrobial defense compounds in cereals. *Nature Communications* **12** (2021).
29. D. M. Goodstein *et al.*, Phytozome: a comparative platform for green plant genomics. *Nucleic Acids Research* **40**, D1178-D1186 (2012).
30. M. Krzywinski *et al.*, Circos: An information aesthetic for comparative genomics. *Genome Research* **19**, 1639-1645 (2009).
31. J. K. M. Brown, M. S. Wolfe, Structure and evolution of a population of *Erysiphe graminis* f. sp. *hordei*. *Plant Pathology* **39**, 376-390 (1990).
32. M. Xu, M. L. Hillwig, S. Prisic, R. M. Coates, R. J. Peters, Functional identification of rice syn-copalyl diphosphate synthase and its role in initiating biosynthesis of diterpenoid phytoalexin/allelopathic natural products. *Plant J* **39**, 309-318 (2004).
33. J. T. Fan *et al.*, Biologically active arborinane-type triterpenoids and anthraquinones from *Rubia yunnanensis*. *J Nat Prod* **74**, 2069-2080 (2011).
34. J. P. Huelsenbeck, F. Ronquist, MRBAYES: Bayesian inference of phylogenetic trees. *Bioinformatics* **17**, 754-755 (2001).
35. A. Rahier, S. Darnet, F. Bouvier, B. Camara, M. Bard, Molecular and enzymatic characterizations of novel bifunctional 3 beta-hydroxysteroid dehydrogenases/C-4 decarboxylases from *Arabidopsis thaliana*. *Journal of Biological Chemistry* **281**, 27264-27277 (2006).

36. J. Ma *et al.*, Transcriptome and allele specificity associated with a 3BL locus for Fusarium crown rot resistance in bread wheat. *PLoS One* **9**, e113309 (2014).
37. J. J. Powell *et al.*, The Fusarium crown rot pathogen *Fusarium pseudograminearum* triggers a suite of transcriptional and metabolic changes in bread wheat (*Triticum aestivum* L.). *Ann Bot* **119**, 853-867 (2017).
38. J. J. Rudd *et al.*, Transcriptome and Metabolite Profiling of the Infection Cycle of *Zymoseptoria tritici* on Wheat Reveals a Biphasic Interaction with Plant Immunity Involving Differential Pathogen Chromosomal Contributions and a Variation on the Hemibiotrophic Lifestyle Definition. *Plant Physiology* **167**, 1158+ (2015).
39. H. Zhang *et al.*, Large-scale transcriptome comparison reveals distinct gene activations in wheat responding to stripe rust and powdery mildew. *BMC Genomics* **15**, 898 (2014).
40. A. Dobon, D. C. E. Bunting, L. E. Cabrera-Quio, C. Uauy, D. G. O. Saunders, The host-pathogen interaction between wheat and yellow rust induces temporally coordinated waves of gene expression. *Bmc Genomics* **17** (2016).
41. Y. Oono *et al.*, Characterisation of the wheat (*Triticum aestivum* L.) transcriptome by de novo assembly for the discovery of phosphate starvation-responsive genes: gene expression in Pi-stressed wheat. *BMC Genomics* **14**, 77 (2013).
42. Z. Liu *et al.*, Temporal transcriptome profiling reveals expression partitioning of homeologous genes contributing to heat and drought acclimation in wheat (*Triticum aestivum* L.). *BMC Plant Biol* **15**, 152 (2015).
43. F. Seifert, S. Bössow, J. Kumlehn, H. Gnad, S. Scholten, Analysis of wheat microspore embryogenesis induction by transcriptome and small RNA sequencing using the highly responsive cultivar "Svilena". *BMC Plant Biol* **16**, 97 (2016).
44. Q. Li *et al.*, Understanding the biochemical basis of temperature-induced lipid pathway adjustments in plants. *Plant Cell* **27**, 86-103 (2015).
45. T. Nomura, A. Ishihara, R. C. Yanagita, T. R. Endo, H. Iwamura, Three genomes differentially contribute to the biosynthesis of benzoxazinones in hexaploid wheat. *Proceedings of the National Academy of Sciences of the United States of America* **102**, 16490-16495 (2005).
